# Supplementary material for: Prognostic value of hemoglobin to red cell distribution width ratio in patients with pulmonary embolism
Source: Research Square preprint supplement (doi:10.21203/rs.3.rs-6888191/v1), 2025-08-05
Supplement: Supplementary file 1 [file 664f504fe770f5cebef36986.xlsx]

## Sheet: 初步汇总
Age	Gender	weight	height	BMI	T	HR	SBP	DBP	RR	SPO2	WBC	Platelet	Hemoglobin	RDW	HRR	Albumin	Sodium	Potassium	Calciumtotal	Glucose	Creatinine	Smoke	AtrialFibrillation	Phlebothrombosis	PTH	Sepsis	Hypertension	Diabetes	Heart failure	AMI	AKI	SOFA	APSIII	OASIS	Charlson	Vasoactiveagent	Anticoagulantdrugs	Antiplateletdrugs	CRRT	Ventilation	Invadeventilation	HospLOS	ICULOS	Death28days	Death90days
56	2	64.1	173	21.4174	36.61	105	104	81	22	100	8.4	113	10.8	13.7	0.788321	2.7	125	2.8	8.1	132	2.7	0	0	0	0	1	0	0	0	0	0	9	59	32	2	1	1	1	0	1	0	14.7	2.91	0	0
78	2	73.4	168	26.0062	36.11	60	131	71	21	99	11.6	143	12.4	11.9	1.04202	3.4	141	4.2	7.7	128	1.5	0	1	1	0	0	0	0	0	0	1	4	39	27	7	1	1	0	0	1	0	4.71	1.31	0	0
69	1	82.6	157	33.5105	36.39	76	109	69	0	91	15.4	310	11.7	14.4	0.8125	2.8	138	4.1	9.3	481	1.2	0	0	0	0	1	0	1	1	0	1	6	24	28	7	1	1	0	0	0	1	4.39	4.48	1	1
78	1	52.9	168	18.7429	36.5	124	116	94	32	97	7.4	140	9.3	17.7	0.525424	2.8	132	5.1	8.9	128	0.9	0	1	0	1	0	0	0	1	0	1	6	54	47	6	1	1	1	0	0	0	5.88	2.08	0	0
31	1	95.1	165	34.9311	37.33	90	138	85	17	100	9	277	11.5	12.2	0.942623	2.8	140	3.5	8.5	111	0.7	0	0	0	0	0	0	0	0	0	1	1	22	21	1	1	1	1	0	0	0	11.33	1.21	0	0
31	1	126	173	42.0996	36.44	93	112	99	17	96	9.3	202	13.1	12.3	1.06504	2.8	145	4.4	9	99	0.9	1	0	1	0	0	1	0	0	0	0	0	7	14	1	1	0	0	0	0	0	4.63	1.99	0	0
72	2	109	178	34.4022	36.72	68	113	62	12	98	12.7	166	11.2	15.7	0.713376	3.3	132	3.5	8.2	124	1.4	1	0	0	0	1	0	0	0	0	1	9	47	34	9	1	1	1	0	1	1	14.06	9.08	0	1
29	1	93.4	168	33.0924	36.72	86	135	94	19	100	12	100	10	11	0.909091	2.8	130	3.5	7.8	118	3.6	0	0	0	0	0	0	0	0	0	0	1	15	15	0	1	0	0	0	0	0	1.14	1.08	0	0
57	1	62	168	21.9671	38.44	106	134	52	23	96	10.4	220	8.7	13.1	0.664122	2.9	138	3.6	9.3	431	2.5	0	0	0	0	1	1	0	1	0	1	4	51	29	8	1	0	0	0	1	0	10.53	3.73	0	0
76	1	59	168	20.9042	37.67	125	112	64	39	99	11.9	304	8.2	18	0.455556	2.8	140	3.6	6.3	91	0.7	0	1	0	0	1	1	0	0	0	1	7	90	42	6	1	1	0	0	1	0	2.22	1.29	1	1
57	1	86	168	30.4705	38.39	102	125	79	25	97	13.3	387	7.7	19.6	0.392857	2.9	128	3.7	8.9	139	0.4	0	0	0	0	1	1	1	0	0	1	6	44	35	2	1	1	1	0	1	1	73.51	13.87	0	0
71	2	97.15	168	34.4211	36.33	73	96	60	26	95	4.2	45	10	19.7	0.507614	2.8	140	4.7	8.8	84	1.8	0	0	0	0	1	0	0	0	0	1	7	49	25	7	1	0	1	0	1	0	3.74	1.91	0	0
68	2	74.4	168	26.3605	37	79	82	49	16	94	13	193	11.3	16.5	0.684848	2.8	135	4.8	8.4	75	7.1	1	1	0	0	1	0	1	1	0	0	5	66	36	6	1	0	0	0	0	0	1.07	1.1	0	0
57	2	104.2	168	36.9189	37.22	87	115	98	31	97	8.8	240	11.4	15.2	0.75	3.3	142	3.4	8.4	82	0.6	0	0	0	0	1	0	0	0	0	1	4	30	35	1	1	1	0	0	1	1	6.86	6.87	0	0
37	1	46.8	168	16.5816	38.83	86	134	82	11	99	14.4	121	9.7	12.4	0.782258	2.6	143	3.3	7.2	133	0.6	0	0	0	0	1	0	0	0	0	0	6	33	22	0	1	0	0	0	0	0	5.03	1.56	0	0
61	1	80.2	168	28.4155	37.5	102	98	61	27	86	18	217	11.6	13.3	0.87218	3.5	141	4.6	8.6	166	1.5	0	0	1	0	0	1	0	0	0	1	4	59	37	9	1	1	1	0	1	0	6.85	2.67	0	0
69	2	87	183	25.9787	36.5	80	110	64	15	100	13	244	7.7	15.9	0.484277	3.5	132	4.9	7.8	132	1	0	0	0	0	0	0	0	1	1	0	2	24	32	6	1	1	1	0	1	1	20.9	1.33	0	0
48	2	61.366666666666674	170	21.2341	37.44	129	145	79	15	96	9.2	358	8.6	17.2	0.5	2.3	156	4.1	8.6	216	1.2	1	0	0	0	0	1	0	0	0	0	2	53	34	8	1	1	1	0	1	1	9.51	5.59	0	1
71	2	164	170	56.7474	36.78	112	106	76	27	82	20.9	156	14	15.7	0.89172	3	136	4.9	8.3	281	1.3	0	1	0	1	1	0	1	1	1	1	11	71	36	9	1	1	0	1	0	0	3.85	3.97	1	1
41	2	135.7	168	48.0796	36.67	144	135	90	27	97	13.5	183	11.7	13.7	0.854015	2.7	143	2.8	8	256	1.2	0	0	0	0	0	0	0	0	0	0	1	46	34	2	1	0	1	0	1	0	7.35	7.32	0	0
69	2	97.75	178	30.8515	36.44	90	100	58	13	100	29.1	266	12	13.7	0.875912	2.8	135	4.2	8.5	116	0.8	0	1	0	0	0	1	0	0	0	0	4	31	25	2	1	1	1	0	1	0	5.73	2.35	0	0
60	1	76.8	168	27.2109	36.78	101	128	98	20	93	7.6	170	12	13.3	0.902256	2.8	138	3.3	8.5	128	0.7	0	0	1	0	0	1	1	0	0	0	1	17	21	2	1	1	0	0	1	0	3.65	2.73	0	0
40	2	90.5	168	32.0649	36.83	121	139	90	21	86	7.8	152	15.4	12.8	1.20312	2.8	142	4.5	9.1	339	0.9	1	0	1	0	0	0	0	0	0	0	3	26	24	2	1	1	0	0	1	0	4.03	1.1	0	0
62	2	83.2	168	29.4785	36.28	91	90	62	28	96	13.3	298	10.1	15.3	0.660131	2.8	136	4.2	7.7	152	0.9	0	1	1	0	1	1	1	1	0	1	4	28	27	5	1	1	1	0	1	0	9.81	1.73	0	0
76	1	59	168	20.9042	36.94	119	115	73	26	92	28.8	421	7.2	16.3	0.441718	2.8	160	3.1	8.5	130	1.4	0	1	0	0	1	0	0	0	0	0	4	84	31	5	1	1	1	0	1	0	9.49	1.63	1	1
55	2	81	168	28.699	37.17	92	116	82	28	86	30.7	349	14.8	12.2	1.21311	2.8	136	5.2	8.1	186	1	0	0	0	0	1	0	1	0	0	1	8	39	35	3	1	1	1	0	0	1	39.68	39.69	0	0
75	1	100.3	160	39.1797	37.22	111	112	74	16	98	16.5	246	9.3	14.5	0.641379	2.5	136	4.7	7.9	80	5.9	0	0	0	0	1	0	0	0	0	1	8	38	23	5	1	0	1	0	0	0	8.53	4.67	0	1
71	1	65.4	168	23.1718	37.22	79	138	62	18	94	9.9	212	9.2	12.6	0.730159	2.8	137	3.8	8.3	155	0.7	0	0	0	0	0	0	0	0	1	1	1	26	14	5	1	1	1	0	1	0	11.35	5.85	0	0
53	2	152.6	193	40.9675	37.61	114	145	89	25	95	6.4	177	12.3	14.5	0.848276	3.6	140	4.1	9	185	1.2	0	0	0	0	0	0	1	1	0	1	1	28	31	3	1	1	1	0	1	0	10.78	5.89	0	0
75	1	54.2	157	21.9887	37	74	108	63	16	100	16.3	329	12.2	14.3	0.853147	2.8	138	4	8	175	0.7	0	0	0	0	1	1	0	0	1	1	1	28	37	7	1	0	1	0	0	1	24.8	24.8	0	0
53	2	95.4	178	30.1098	37.06	121	103	81	15	95	10.7	149	12	13.6	0.882353	2.8	138	5	8	148	0.9	1	0	0	1	0	0	1	0	0	1	3	26	26	2	1	1	0	0	0	0	2.93	1.9	0	0
72	2	76.7	168	27.1755	36.83	89	105	58	26	97	33.1	215	8.2	19.7	0.416244	2.9	131	4.2	7.6	127	0.9	1	0	0	0	1	0	0	0	0	1	3	49	42	7	1	1	0	0	1	1	26.41	3.67	1	1
40	2	143	185	41.7823	36.72	89	120	62	26	100	19.5	155	15.9	14	1.13571	2.8	141	4.7	10.2	128	1.6	0	0	0	0	0	0	0	0	0	1	4	43	34	0	1	1	0	0	1	1	16.29	4.51	0	0
53	1	60	170	20.7612	38.83	138	117	90	41	91	18.7	326	8.5	17.9	0.47486	2.3	135	3.1	7.3	105	0.7	0	1	0	0	0	0	0	0	0	0	2	45	39	7	1	1	1	0	1	0	10.31	1.23	0	1
61	2	72.4	170	25.0519	36.56	119	133	98	32	96	15.6	198	17	12.8	1.32812	3.6	140	4.9	8	121	1.4	0	0	0	0	0	0	0	0	0	1	3	42	34	2	1	1	0	0	1	0	3.98	2.17	0	0
38	1	78.7	168	27.8841	37.5	77	103	86	38	98	16.1	124	9.1	15	0.606667	2.3	136	2.9	8	137	0.8	1	0	0	1	1	0	0	0	0	1	5	46	28	0	1	1	0	0	0	0	18.75	2.9	0	0
45	1	77.2	168	27.3526	36.5	138	150	80	24	100	5	193	10	15.5	0.645161	2.8	138	4.5	10	297	1.4	1	0	0	0	1	0	0	0	0	0	4	43	24	2	1	1	0	0	0	0	2.88	1.28	0	0
46	2	86.8	178	27.3955	36.06	122	141	71	19	100	13.6	130	13.5	14	0.964286	3.1	143	4.7	7.6	127	1	1	0	0	0	1	0	0	0	0	0	6	30	35	0	1	1	1	0	1	1	9.24	3.89	0	0
63	2	93.2	168	33.0215	36.33	69	117	81	13	97	4.3	270	11.9	15.9	0.748428	3.2	140	4.1	8.2	189	0.7	1	0	1	0	0	1	0	0	0	1	1	22	19	6	1	1	0	0	0	0	3.66	1.41	0	0
77	2	110.8	168	39.2574	37.89	87	109	53	24	98	14.8	265	11.2	12.6	0.888889	2.8	133	4.2	8.1	180	1.2	1	0	0	0	0	1	1	0	0	0	2	28	21	7	1	1	0	0	1	0	6.21	2.34	0	0
64	2	58.9	168	20.8688	37.17	101	98	72	16	97	40.4	238	10.6	14.6	0.726027	3	137	4.1	8.5	160	1.2	0	0	1	0	1	0	0	0	0	0	2	35	28	4	1	1	0	0	1	0	6	1.1	0	0
61	1	106.85	157	43.3486	37.22	88	117	63	33	100	17.8	183	15.2	15.8	0.962025	3	144	4.9	8.6	125	0.4	0	1	0	0	0	0	0	0	0	1	1	48	26	2	1	0	1	0	0	0	6.07	4.86	0	0
48	2	96.5	168	34.1908	37.06	105	138	102	26	99	12	100	10	11	0.909091	2.8	130	3.5	7.8	118	3.6	0	0	1	0	0	0	0	1	0	0	3	33	27	10	1	1	0	0	1	0	46.59	2.67	0	0
64	2	124.55	185	36.3915	37.22	72	126	72	15	99	6	93	9.3	13.6	0.683824	2.8	137	4.8	8.3	129	1	0	0	1	0	0	0	0	0	0	1	5	19	11	3	1	1	0	0	1	0	5.93	1.1	0	0
53	2	218.3	168	77.3455	36.5	108	141	99	20	93	11.1	188	13.8	15	0.92	3.8	140	4.1	9.4	116	1.1	0	0	0	0	0	0	0	0	0	1	0	28	26	1	1	1	0	0	1	0	6.36	2.2	0	0
40	1	68	168	24.093	37.28	90	132	73	13	100	14.5	360	11.8	14.5	0.813793	3	135	4.3	7.6	276	0.6	0	0	0	0	1	1	1	0	0	0	1	37	25	4	1	1	0	0	0	0	38.11	2.04	0	0
62	2	123	180	37.963	38.61	136	100	63	25	100	16.9	477	10.9	14.8	0.736486	3	138	5.9	7.2	196	2	0	1	0	1	1	0	1	0	0	1	7	61	44	13	1	1	0	0	1	1	20.74	3.67	0	0
74	1	77.1	168	27.3172	36.67	78	154	94	17	97	7	132	12.1	13.2	0.916667	2.8	136	3.9	8.7	125	0.8	0	0	1	0	0	1	0	0	0	0	1	20	18	4	1	1	0	0	0	0	2.43	1.73	0	0
47	2	137.8	191	37.7731	37.78	93	133	84	19	99	9.4	328	11.9	14	0.85	2.8	137	5.2	8.4	118	0.7	1	1	0	0	0	1	0	0	0	1	6	71	39	3	1	0	0	0	1	1	15.14	3.1	0	0
56	2	147	183	43.895	37.61	135	147	109	27	93	16.6	355	13.5	15.1	0.89404	4.4	139	6.4	9.1	265	1.3	0	0	0	0	0	0	1	0	0	1	8	90	53	4	1	1	0	0	1	1	18.9	3.34	0	1
72	1	65.3	150	29.0222	36.94	75	118	70	21	96	4.4	228	8.9	18.1	0.491713	2.8	142	3.3	8	86	3.4	1	1	1	0	1	0	0	0	0	1	3	45	26	6	1	0	1	0	1	1	19.72	4.74	0	0
29	2	141.96666666666667	175.26	46.219	37.78	88	101	67	9	97	12.2	163	14.2	13.6	1.04412	3.5	142	4.5	7.2	124	1	1	0	0	0	0	1	0	0	0	1	9	17	41	0	1	1	0	0	1	1	5.41	3	0	0
31	2	93	168	32.9507	37.22	97	115	99	24	94	10.5	36	9.6	19.3	0.497409	2.5	133	2.8	8.9	109	2.1	0	0	0	0	1	0	0	0	0	0	11	41	31	0	1	0	1	0	1	0	24.95	1.89	0	0
62	1	135.45	163	50.9805	37	133	96	61	16	100	14.1	173	11.4	16.4	0.695122	3.4	137	3.9	8.5	127	0.9	0	0	0	0	1	0	0	1	0	1	10	47	48	8	1	0	0	0	1	1	8.87	2.77	0	0
62	2	135.1	168	47.8671	36.72	108	123	76	27	92	25.7	356	15	16.2	0.925926	3.1	135	5.3	8.9	163	0.8	0	0	1	1	0	0	1	1	0	1	5	43	33	6	1	1	0	0	1	0	6.34	2.46	0	0
72	2	73.8	178	23.2925	36.72	67	107	65	19	96	15.6	169	9	20.8	0.432692	2.9	134	4.6	8.8	106	1.2	0	0	0	0	0	0	0	0	0	1	1	31	26	4	1	0	0	0	0	0	17.38	1.37	0	0
52	2	82.95	170	28.7024	37.06	54	137	86	10	100	6.2	72	7.5	19.9	0.376884	2.8	137	5.7	7.6	140	17.8	0	0	1	0	0	0	0	1	1	1	10	40	24	5	1	1	1	0	1	1	12.73	3.21	0	0
72	2	75.15	168	26.6263	36.72	84	89	39	20	96	9.1	171	7.5	20.8	0.360577	2.3	141	4.4	8.2	115	1	0	0	0	0	1	1	1	1	0	1	4	68	30	7	1	1	0	0	1	0	4.8	3.81	0	0
59	2	76.3	183	22.7836	36.94	87	129	48	15	96	7.1	192	7.1	20.8	0.341346	2.8	137	3.7	8.2	260	0.6	1	1	0	0	0	1	0	0	0	1	1	34	28	1	1	0	0	0	1	0	19.99	4.97	0	1
55	1	73	165	26.8136	37.39	108	91	40	21	93	13.8	276	8.2	14	0.585714	2.9	143	3.8	7.1	108	0.4	0	0	0	0	1	0	0	0	0	1	2	32	29	2	1	1	0	0	1	0	6.08	3.01	0	0
71	2	120	168	42.517	37	67	144	78	18	97	3.6	214	12.3	13.3	0.924812	2.8	142	4	8.9	102	0.8	0	0	0	0	0	1	0	0	0	1	4	26	28	4	1	1	0	0	0	0	11.97	11.93	0	0
52	2	110.7	168	39.2219	36.67	123	134	96	30	94	9.5	283	14.4	13.5	1.06667	2.9	135	4.3	9.1	124	1	1	0	1	0	0	1	0	0	0	1	0	31	25	2	1	1	0	0	1	0	3.91	2.93	0	0
52	2	51.3	173	17.1406	37.22	107	115	102	17	97	13.2	235	16.1	14.8	1.08784	4	157	5.2	10	141	1.4	0	0	0	0	1	0	0	0	0	1	5	41	34	1	1	0	0	0	0	1	5.36	5.82	1	1
74	2	66.23333333333333	168	23.467	38.22	67	111	65	23	99	5.7	127	9.9	15.1	0.655629	3	136	4.2	9	123	1.1	0	0	0	0	0	1	0	0	0	1	2	32	26	5	1	1	1	0	0	0	16.46	1.03	0	0
66	1	49.85	155	20.7492	36.28	98	112	72	18	89	12.3	375	13.3	13.4	0.992537	4	137	4.1	9.3	146	0.9	0	0	0	0	1	0	0	0	0	1	4	47	26	4	1	0	0	0	1	1	28.22	14.31	0	0
79	1	62.7	168	22.2151	36.78	82	130	54	21	91	14.6	282	9.7	13.1	0.740458	2.8	128	4.7	8.3	272	0.7	0	0	0	0	1	1	1	0	0	1	3	33	23	4	1	0	0	0	0	0	12.66	2.19	0	0
64	1	69	168	24.4473	37.56	96	94	72	25	96	14	248	9.3	17.2	0.540698	2.8	136	3.2	7.7	87	0.9	0	0	0	0	1	1	0	0	0	0	4	47	25	4	1	1	1	0	1	0	5.5	1.2	0	0
55	2	90	178	28.4055	37.56	107	105	53	16	75	11.6	320	8.9	14.7	0.605442	2.8	142	4.5	8	119	1.4	0	0	0	0	0	0	0	0	0	1	5	49	30	2	1	1	0	0	1	1	16.69	2.14	0	0
73	2	69	168	24.4473	NULL	112	108	66	21	99	23.2	155	15.5	13.3	1.16541	2.8	148	3.1	8.1	142	1.6	0	1	1	0	0	0	0	0	0	1	6	44	32	3	1	0	0	0	0	1	0.07	1.03	1	1
63	2	47	168	16.6525	36.44	77	131	70	20	95	10.8	158	9	15.8	0.56962	2.8	140	5.2	9	274	1.5	0	0	0	0	1	1	0	0	0	0	2	43	21	4	1	1	1	0	1	0	6.71	2.39	0	0
70	1	59.5	147	27.5348	36.28	120	87	42	23	93	12.8	218	8.9	21.6	0.412037	2.2	140	3.3	6.6	174	0.7	0	1	1	0	1	0	0	1	0	1	4	54	32	6	1	0	1	0	1	0	15.33	9.61	0	0
62	1	72.2	152	31.25	39.28	80	139	53	21	100	8.7	256	9.7	13.1	0.740458	3	137	4.6	9.1	371	1	0	0	0	0	1	0	0	1	1	1	5	44	42	5	1	1	0	0	1	1	71.66	7.7	0	1
41	2	64.2	180	19.8148	35.89	80	112	65	15	98	11.8	176	8.1	14.6	0.554795	2	127	3.9	7.2	149	0.4	0	0	0	0	1	0	0	0	0	1	1	25	34	1	1	1	0	0	1	1	52.09	23.99	0	0
54	2	82.4	170	28.5121	36.89	104	169	120	22	99	12.5	237	14.2	14.6	0.972603	4.3	142	4.1	8.1	135	0.7	1	0	0	0	1	0	0	0	0	1	3	21	35	1	1	1	0	0	1	1	82.91	6.11	0	0
71	2	93.9	178	29.6364	36.61	143	106	80	27	97	9.2	157	14	15	0.933333	2.7	137	4.3	8.5	103	1.5	1	1	0	0	1	1	0	1	0	1	5	45	34	4	1	0	0	0	1	0	8.83	6.81	0	0
54	2	78.3	168	27.7423	36.5	121	114	83	28	94	8.1	220	13.1	12.6	1.03968	3.3	143	3.6	8.3	122	0.6	0	0	0	0	0	0	0	0	0	0	0	31	22	7	1	1	0	0	1	0	6.8	1.86	0	0
26	2	230.25	185	67.2754	36.89	110	158	122	24	92	11.3	198	16.5	20.5	0.804878	2.9	142	4.2	8.4	162	0.9	0	0	0	0	0	0	0	1	0	1	5	38	28	2	1	0	0	0	1	0	13.64	3.84	0	0
69	2	65	178	20.5151	37.33	64	146	68	16	100	11	133	10.4	15	0.693333	2.9	136	4.3	8.4	170	0.7	0	0	1	0	0	1	0	0	0	1	5	57	33	4	1	1	0	0	0	1	9.5	4.87	0	0
63	2	111.15	173	37.1379	36.44	80	120	83	12	100	12.9	147	12	13.2	0.909091	2.8	137	4.1	8.5	113	1	0	1	1	0	1	0	0	0	1	1	6	26	29	4	1	0	0	0	1	1	10.84	2.01	0	0
62	1	68.65	168	24.3233	36.33	74	98	66	20	100	8.2	187	10.1	18.3	0.551913	2.4	139	4.3	7.9	111	0.6	0	0	1	0	1	0	1	0	0	0	1	37	41	5	1	0	0	0	0	0	17.89	2.11	0	0
22	1	78	168	27.6361	36.72	137	110	76	19	92	21.2	209	12.7	12.7	1	3.2	136	3.4	8.7	260	0.7	0	0	1	0	1	0	0	0	0	1	12	79	42	0	1	1	0	0	1	1	321.58	3.69	0	0
72	1	86.4	168	30.6122	35.89	77	94	52	20	100	14.5	156	9.2	16.3	0.564417	2.8	139	4.6	7.9	148	0.6	0	0	1	0	0	1	0	0	0	1	4	49	37	3	1	1	1	0	1	0	10.24	2.12	0	0
56	2	114	170	39.4464	35.89	89	130	89	25	99	10.3	216	13.7	13.1	1.0458	2.8	138	3.8	8.6	106	1	0	0	0	0	0	1	0	0	0	0	0	17	23	1	1	0	0	0	1	0	3.09	1.15	0	0
49	1	102	173	34.0807	36.89	128	123	85	17	83	11.4	43	12.1	14.5	0.834483	2.8	135	4.7	8.1	226	10.9	0	1	0	0	1	0	1	0	0	1	18	100	47	4	1	1	0	1	1	1	11.08	11.19	1	1
68	1	71.8	168	25.4393	36.61	77	95	55	20	97	53.4	242	10.6	21.2	0.5	1.5	131	3.5	8.2	106	7.5	0	0	0	0	1	0	1	1	0	1	5	72	35	7	1	1	1	1	1	1	41.31	24.5	0	1
66	1	56.7	168	20.0893	36.89	80	108	71	11	100	8.9	72	8.6	12.7	0.677165	2.8	140	4.6	8.3	128	0.7	0	1	1	0	0	0	0	0	0	0	5	28	23	2	1	1	1	0	1	0	6.73	1.2	0	0
29	1	48.4	168	17.1485	39.5	116	109	72	31	96	23.2	400	6.2	21.2	0.292453	3.2	138	4.4	9	111	0.5	0	0	0	1	1	0	0	0	0	0	3	35	25	1	1	1	0	0	1	0	6.85	1.91	0	0
66	1	84.3	160	32.9297	36.89	110	132	58	17	98	11.3	136	9.9	13.4	0.738806	2.8	139	3.7	7.8	107	0.7	0	0	1	0	1	0	0	0	0	1	2	38	30	2	1	0	1	0	1	0	7.08	2.12	0	0
54	1	90	168	31.8878	37	84	150	66	16	95	7.9	239	11.9	12.5	0.952	4.2	139	4.5	9.6	107	0.7	0	0	0	0	0	0	0	0	0	0	1	15	15	1	1	0	0	0	0	0	3.91	1.07	0	0
72	1	108.7	160	42.4609	36.39	105	127	67	27	87	22.8	258	8.7	14.6	0.59589	2.5	137	4.7	7.6	168	2.2	0	0	0	0	0	1	0	1	0	1	5	67	37	5	1	0	1	0	1	0	13.77	3.23	0	0
64	2	64.8	183	19.3496	37.11	108	121	68	41	82	13.3	21	11.9	12.7	0.937008	2.3	165	5.3	8.3	104	7.4	0	0	0	0	1	0	0	1	0	1	21	184	61	7	1	1	1	1	0	1	3.54	3.64	1	1
46	2	67.9	168	24.0575	36.72	84	126	78	14	100	8.8	257	12.7	11.5	1.10435	4.1	138	4.4	9.1	127	0.9	0	0	0	0	1	0	0	0	0	1	2	22	23	1	1	0	0	0	1	0	9.83	6.72	0	0
72	1	94.2	168	33.3759	36.78	126	129	84	25	98	10.5	502	9.4	13.8	0.681159	2.8	138	4.2	8.4	110	1	0	0	0	1	0	1	1	0	0	1	1	42	34	6	1	1	0	0	1	0	10.77	1.87	0	1
55	2	101	178	31.8773	36.44	63	146	58	13	92	13.3	175	12.8	12.1	1.05785	2.8	138	4.5	8.6	125	0.9	0	0	0	0	0	0	0	0	0	1	3	35	23	4	1	0	1	0	1	0	23.69	8.8	0	0
65	2	91.9	168	32.5609	37.17	76	104	60	14	98	21.9	315	7.9	13.2	0.598485	2.8	139	3.4	8.2	139	0.8	0	1	1	0	0	0	0	0	0	1	1	37	35	4	1	1	0	0	1	0	8	3.67	0	0
29	1	88.7	168	31.4272	37	77	109	65	16	100	4.9	257	7.9	15.9	0.496855	4.1	141	4.1	8.8	94	0.7	0	0	1	0	0	0	0	0	0	1	2	38	36	1	1	1	0	0	0	0	10.6	2.63	0	0
61	1	82	168	29.0533	38.56	135	114	69	30	93	20.6	264	14.6	13.2	1.10606	3.1	136	5.3	8.2	362	1.4	0	0	0	0	1	1	1	0	0	1	6	61	44	3	1	1	1	0	0	1	59.7	53.01	0	0
66	1	86	168	30.4705	36.72	104	138	84	15	93	10.6	358	9.3	16.5	0.563636	2.8	139	4.1	8.9	190	1.4	1	0	0	0	0	1	1	0	0	0	2	24	21	4	1	1	1	0	1	0	2.73	1.43	0	0
77	2	69	183	20.6038	36.44	72	119	73	25	95	8.6	99	11.6	15	0.773333	3.3	140	4.4	8.7	95	3.7	0	1	0	1	1	0	0	1	0	1	10	42	36	4	1	1	1	0	0	1	10.7	1.68	0	1
72	2	136	188	38.4789	35.78	94	148	87	16	99	8.8	208	12.8	14.1	0.907801	2.8	144	4.8	9.5	123	1.2	0	0	0	0	0	1	1	0	0	1	2	31	24	4	1	0	0	0	0	0	3.85	2.84	0	0
40	2	91	188	25.7469	37.17	116	161	86	36	96	20.6	115	10.1	14.7	0.687075	1.7	137	3.9	7.1	82	0.9	0	0	0	0	1	0	0	0	0	1	4	48	37	2	1	1	1	0	1	1	14.88	5.15	0	0
58	2	98.6	178	31.1198	37.44	122	114	70130	24	100	24.2	275	13.3	12.7	1.04724	2.8	136	4.1	8.7	295	1.2	0	1	0	0	1	0	1	1	0	1	7	67	36	3	1	1	1	0	1	1	51.28	7.33	0	0
69	1	90.5	165	33.2415	36.72	77	105	72	18	99	14.1	277	7	18.8	0.37234	2.7	139	5	9.4	112	1.7	0	1	1	0	1	1	1	0	0	1	8	33	33	6	1	1	1	0	1	1	5.61	1.83	0	0
45	1	88	168	31.1791	36.06	99	103	88	7	100	12.7	296	7.8	19	0.410526	2.8	137	3.6	7.5	128	1.1	0	0	0	0	0	0	0	0	0	0	2	33	27	0	1	1	0	0	1	1	27.72	2.36	0	0
49	1	70.85	170	24.5156	37.06	67	83	64	26	93	7.3	106	7.2	20.7	0.347826	1.7	144	3.2	7.9	73	0.5	0	0	0	0	1	0	0	0	0	1	8	36	29	3	1	1	1	1	0	1	34.3	34.33	0	0
71	2	97.2	168	34.4388	36.22	95	123	63	19	97	17	193	15.3	13.2	1.15909	2.8	142	3.7	9.2	122	0.6	1	0	1	0	0	0	0	0	0	1	2	17	20	4	1	0	0	0	1	0	2.49	1.31	0	0
58	2	123.6	188	34.9706	36.67	110	137	83	22	96	11.9	252	13.8	14.5	0.951724	3.5	138	4.4	8.4	167	1.3	0	0	1	0	1	0	0	0	0	1	5	43	28	6	1	0	1	1	1	1	11.51	9.89	1	1
73	1	77.8	168	27.5652	36.5	89	100	80	35	98	15.8	429	9.8	18	0.544444	2.8	133	4.2	7.5	108	2.8	1	0	0	0	0	1	0	0	0	0	3	44	29	9	1	0	0	0	1	0	3.89	2.82	0	0
65	2	88	183	26.2773	36.44	84	125	103	18	100	14	186	12.7	13.9	0.913669	2.8	141	4.2	8.2	107	1.3	0	1	1	0	1	0	0	0	0	1	9	21	29	2	1	0	1	0	1	1	7.09	3.46	0	0
69	2	84.5	168	29.9391	36.94	68	146	85	13	97	7.6	314	10.4	14.3	0.727273	3.6	142	3.9	9.2	138	1.2	0	0	0	0	0	1	0	0	0	0	2	26	25	4	1	1	0	0	0	0	11.54	3.46	0	0
69	1	67.75	163	25.4996	36.94	68	127	70	18	100	14.9	124	8.5	15	0.566667	2.8	137	4.8	8.4	100	0.6	0	1	0	0	0	0	0	1	0	1	4	24	30	3	1	0	0	0	1	1	4.67	1.12	0	0
29	1	54.95	155	22.872	37.33	93	141	97	13	100	9.5	265	7.6	14.1	0.539007	3.8	136	4.6	7.6	131	6.1	0	0	0	0	0	0	0	0	0	1	4	20	23	3	1	0	1	0	1	1	12.78	2.96	1	1
45	1	72.8	168	25.7937	38	134	143	59	14	99	15.7	200	10.2	12.1	0.842975	2.8	157	3.7	8.1	125	0.5	0	0	0	0	1	0	0	0	0	1	4	73	33	2	1	1	0	0	1	0	16.77	2.81	0	0
53	2	71	163	26.7229	37.89	108	151	78	33	91	19.5	369	10.4	13.8	0.753623	3.1	136	4.7	9.2	144	0.7	0	0	0	0	1	1	0	0	0	0	2	18	32	2	1	1	0	0	1	0	8.68	2.92	0	0
68	2	70	178	22.0932	37.56	135	109	63	21	97	21.2	226	14.6	15.6	0.935897	3.1	135	5.3	8.8	137	1	0	1	0	0	0	0	0	0	0	1	8	90	53	4	1	0	1	0	0	1	13.65	13.65	0	0
61	2	60	168	21.2585	38.33	137	117	67	31	98	22.2	287	12.4	13.9	0.892086	2	130	6.3	8.6	136	3.4	1	1	0	0	1	0	0	0	0	1	7	63	31	2	1	0	0	0	1	0	58.04	1.33	0	0
42	2	82.75	173	27.6488	37	103	137	78	28	94	9.4	534	11.8	13.1	0.900763	3.3	140	3.9	8.8	102	0.7	0	0	0	0	0	0	0	0	0	0	0	22	25	6	1	1	1	0	1	0	6.62	2.65	0	0
35	2	84	168	29.7619	36.89	94	133	96	17	99	11.6	401	11.9	13	0.915385	3.1	137	4.7	8.5	141	0.7	0	0	0	0	1	0	0	0	0	0	0	35	28	0	1	0	0	0	0	0	27.83	1.27	0	0
62	1	60	168	21.2585	36.39	77	132	70	18	92	11.7	126	13.1	15.2	0.861842	2.8	141	4	9	140	0.7	0	0	0	0	0	0	0	1	0	0	1	27	28	4	1	1	1	0	1	0	6.09	2.06	0	0
57	2	86.4	178	27.2693	37.5	121	135	83	16	95	15.7	141	14	12.6	1.11111	4	143	4.1	8.9	201	1	0	0	0	0	1	0	0	0	0	1	4	42	25	3	1	0	0	0	1	1	13.15	6.41	0	0
73	2	95	168	33.6593	36.78	66	141	85	18	94	6.6	338	16.1	16.5	0.975758	2.8	143	4	9.9	107	1.2	1	0	0	0	0	0	0	1	0	1	2	21	24	7	1	0	0	0	1	0	4.97	1.09	0	0
72	1	113.7	168	40.2849	36.83	87	116	48	14	99	16	432	11.1	18.1	0.61326	2.8	129	2.8	8.1	264	1.4	0	1	0	0	1	0	1	1	0	1	5	60	24	7	1	1	0	0	0	0	2.04	1.97	0	0
64	1	63.8	168	22.6049	36.39	118	188	127	21	96	19.8	461	12.1	14.3	0.846154	3.1	141	3.2	7.6	121	0.7	0	0	1	0	1	1	0	0	0	1	1	48	36	2	1	1	0	0	1	1	16.82	13.71	0	0
74	2	48.3	183	14.4226	37.39	69	98	80	13	98	10.1	673	9.2	17.2	0.534884	2.5	143	3.2	9.7	98	1.2	1	0	0	0	1	0	0	0	0	1	4	38	44	8	1	0	0	0	1	1	40.67	15.6	0	0
63	1	111.4	168	39.47	36.89	81	156	90	19	98	9.3	158	11.1	14	0.792857	3.5	144	4.2	8.6	105	1.2	0	0	0	0	0	0	1	0	1	1	3	33	20	4	1	1	0	0	0	0	5.09	1.17	0	0
50	1	123.3	168	43.6862	36.89	67	115	80	17	95	9.9	180	11.6	12.3	0.943089	3.8	134	3.7	8.1	89	0.9	0	0	0	0	0	1	0	0	0	1	0	24	23	1	1	1	0	0	0	0	5.02	1.32	0	0
51	1	74.4	168	26.3605	37.17	125	123	78	0	97	19.5	186	7.7	20.7	0.371981	2.6	133	4.6	8.6	81	0.9	0	0	0	0	0	0	0	0	0	1	4	25	17	3	1	0	0	0	1	0	28.69	1.72	0	1
19	2	73.5	168	26.0417	37	102	124	65	14	96	9.8	233	11.9	12.3	0.96748	2.8	144	3.4	8.9	92	0.6	0	0	0	0	0	0	0	0	0	1	2	23	16	1	1	1	1	0	0	0	2.7	1.84	0	0
60	2	165.3	168	58.5672	37.06	114	135	84	36	91	15.4	211	13.4	14.2	0.943662	3.2	142	4.1	8.3	110	0.9	0	0	0	1	0	1	0	0	0	1	0	28	31	2	1	0	0	0	1	0	5.08	1.23	0	0
60	1	91.3	166	33.1325	NULL	74	106	70	12	100	11.1	111	10.2	12.3	0.829268	2.8	138	4.4	7.8	116	0.7	0	1	0	0	0	0	0	0	0	1	1	16	25	1	1	0	0	0	1	1	9.22	1.4	0	0
45	2	106.1	168	37.5921	36.67	65	136	92	13	99	3.8	135	9.8	16.2	0.604938	3.8	137	4.2	8.9	91	1.1	0	0	1	0	0	0	1	0	0	0	1	15	13	2	1	1	0	0	1	0	14.35	1.86	0	0
75	1	88.9	168	31.498	36.44	117	119	61	32	95	34.4	498	8.4	25.9	0.324324	2.8	140	3.8	7.8	98	1.1	0	0	0	0	0	0	0	0	0	1	2	48	34	5	1	0	0	0	0	0	11.05	1.61	1	1
48	1	96	173	32.0759	37.83	115	174	103	26	99	3.7	341	13.1	14.5	0.903448	2.8	137	4.6	7.5	116	0.6	0	0	0	0	1	1	0	0	0	1	9	63	47	0	1	1	0	0	1	1	20.84	9.94	0	0
68	2	126.2	168	44.7137	37.83	71	104	62	42	94	6.3	313	8.4	15.1	0.556291	2.8	142	4.1	8.6	103	0.8	0	0	1	0	0	0	0	0	0	1	2	31	28	2	1	0	1	0	1	0	12.83	9.82	0	0
75	2	112.2	168	39.7534	37.22	73	150	76	18	99	21.9	205	8.3	15.8	0.525316	2.8	137	4.1	7.4	141	3.8	0	0	0	0	0	1	0	0	0	1	10	53	41	4	1	1	0	0	1	0	4.02	1.93	0	0
69	1	109.55	163	41.2323	37.11	87	111	79	20	96	7.6	229	10.5	14	0.75	2.8	136	4.5	8.9	130	0.8	0	0	1	0	0	1	1	0	0	1	1	22	19	3	1	1	1	0	1	0	8.9	1.82	0	0
80	1	65	163	24.4646	34.94	86	103	75	9	91	13.5	118	9.8	17.1	0.573099	2.8	139	3.2	6.3	133	0.7	0	1	0	0	1	1	0	0	0	0	11	63	38	3	1	0	0	0	1	1	9.13	3.34	0	0
67	2	97.4	180	30.0617	36.89	88	135	68	23	95	88.3	85	6.4	16	0.4	2.8	144	3.8	8.5	136	1.6	0	0	0	0	1	1	0	0	0	1	8	51	38	5	1	1	0	0	1	0	61.97	4.89	0	0
76	1	42.4	168	15.0227	38.17	104	154	59	24	94	10.4	245	11.5	13	0.884615	2.8	139	6.6	8.6	101	0.6	0	1	0	0	1	0	0	0	0	1	2	40	29	4	1	0	0	0	1	0	8.03	4.02	0	0
74	1	73.6	168	26.0771	37.83	117	146	74	26	97	12.2	269	9.3	16.9	0.550296	2.4	145	4.5	8.9	139	1	0	0	0	0	1	1	0	0	0	1	3	51	38	3	1	0	0	0	1	1	13.38	13.42	1	1
57	1	53.150000000000006	168	18.8315	36.78	97	108	77	16	97	6	473	6.8	18	0.377778	2.5	139	4.5	7.4	101	0.7	0	0	0	0	1	0	0	1	0	0	5	37	38	3	1	1	1	0	1	0	5.84	5.78	0	0
50	1	80.3	168	28.451	37.06	131	161	101	22	98	9.5	234	11.7	14.1	0.829787	2.8	141	3.8	8.4	99	0.5	0	0	0	0	0	1	0	0	0	0	0	20	22	0	1	0	1	0	1	0	3.64	1.69	0	0
51	2	115	168	40.7455	36.78	90	127	80	24	95	6.1	242	10.9	13.1	0.832061	2.8	140	3.9	8.8	119	0.8	0	0	1	0	0	1	0	0	0	1	1	30	18	1	1	1	0	0	1	0	24.83	2.47	0	0
65	1	145	157	58.8259	36.72	61	100	56	28	96	10.8	183	14.5	13.3	1.09023	2.8	146	3.3	8.1	272	1.1	0	1	0	0	0	0	1	1	0	1	1	38	30	5	1	1	1	0	1	0	10.07	5.46	0	0
72	2	86.4	170	29.8962	37.39	70	153	69	18	95	7	280	13.1	13	1.00769	2.9	140	4.1	9.3	81	0.9	0	0	0	0	1	0	0	0	0	1	1	30	33	3	1	1	0	0	0	1	20.35	19.85	1	1
39	2	66.5	168	23.5615	36.28	94	91	57	16	100	10.5	86	9.3	19.3	0.481865	2.9	139	4.4	8.6	103	2.7	0	0	0	0	1	0	0	1	0	1	6	20	22	4	1	1	0	0	1	0	17.97	2.06	1	1
79	2	69	168	24.4473	36.39	66	109	54	20	97	11.5	125	11.3	13	0.869231	2.8	137	4.2	8.5	107	0.8	1	0	0	0	0	1	0	0	0	0	2	28	23	4	1	0	0	0	1	0	5.93	1.17	0	0
70	2	68.5	183	20.4545	36.61	119	147	89	28	98	15.6	167	9	14.5	0.62069	2.3	139	4.6	7.4	163	0.9	1	0	0	0	0	0	1	1	0	0	6	39	37	7	1	1	0	0	0	1	53.16	1.05	0	0
66	1	96.7	168	34.2616	36.72	103	120	80	26	99	10	373	7.6	14.4	0.527778	2.8	135	4.2	8.1	101	0.8	0	0	0	0	0	0	0	0	1	0	0	34	26	3	1	0	0	0	1	0	5.59	1.95	0	0
55	2	117	168	41.4541	37.22	93	142	80	34	95	16.7	241	10.5	14.3	0.734266	2.8	145	4	7.9	143	1.1	1	0	0	0	0	0	0	0	0	1	0	23	25	1	1	0	0	0	1	0	23.66	1.43	0	0
71	1	67.4	168	23.8804	37	74	92	60	8	100	3.8	221	11.2	13.2	0.848485	4.5	141	3.4	9.3	125	0.7	0	1	0	0	0	0	0	0	0	1	2	39	22	5	1	1	0	0	1	0	34.48	2.24	0	0
43	2	127	168	44.9972	38.22	97	91	45	22	95	9.2	149	11.1	14.6	0.760274	3.4	135	3.7	8.3	126	1.1	0	0	1	0	1	0	0	0	0	0	8	39	21	2	1	1	0	0	1	0	8.78	2.15	0	0
64	2	131.2	178	41.4089	37.67	76	94	46	16	91	19.9	229	8.8	14.3	0.615385	2.2	133	3.3	7.3	191	1	0	0	0	0	1	1	1	1	0	1	6	42	24	5	1	0	0	0	1	0	23.6	5.02	0	0
56	2	124	185	36.2308	37.06	93	93	51	14	100	15.6	403	10.1	14.4	0.701389	2.8	139	4.3	8.7	94	1	0	0	1	0	0	0	0	0	0	1	2	29	37	1	1	1	0	0	1	1	8.77	1.07	0	0
79	1	106.3	160	41.5234	35.67	72	142	62	16	94	14.2	219	9.3	13.2	0.704545	2.8	146	3.6	8.1	114	0.7	0	0	0	0	0	0	0	0	0	1	4	56	49	4	1	0	0	0	1	0	10.95	9.99	0	0
68	2	167.36666666666667	168	59.2994	36.83	109	154	66	17	100	13.1	295	6.2	16.8	0.369048	3.5	135	5.9	8.8	230	2.1	0	0	1	0	1	1	1	0	0	1	6	68	32	6	1	1	1	0	0	0	58.63	3.85	0	1
36	1	152.4	170	52.7336	36.89	86	72	50	26	100	15.3	45	8.1	15.1	0.536424	2.4	133	4.4	7	157	1	0	0	1	0	1	0	0	0	0	1	8	35	24	0	1	1	1	0	1	0	27.23	2.76	0	0
35	1	137.56666666666666	163	51.7771	36.72	112	144	72	31	95	18	208	13.8	14.1	0.978723	2.3	130	3.9	8.5	272	1	1	0	0	0	1	0	1	0	0	1	5	57	38	1	1	1	1	0	1	1	43.91	33.01	0	0
54	2	202	173	67.4931	36.83	116	122	58	22	98	28.3	231	13.5	14.9	0.90604	2.8	137	3.8	7.1	211	1.6	0	0	0	0	1	1	0	0	0	1	6	73	40	1	1	1	0	0	1	1	8.73	3.68	0	0
74	2	97.2	185	28.4003	37	120	182	57	14	94	20.7	159	9.6	13.8	0.695652	2.8	136	5.2	8.4	185	1.3	0	1	0	0	0	1	1	0	1	1	5	38	33	5	1	0	1	0	1	1	12.1	3.1	0	0
66	2	107.2	180	33.0864	36.22	58	92	69	18	93	6.5	161	11	16.2	0.679012	2.6	141	5	7.8	115	1.2	0	1	0	0	1	0	0	0	0	1	8	31	40	3	1	1	1	0	1	1	4.75	4.77	0	1
70	1	62	168	21.9671	36.72	104	121	68	36	81	10.7	121	10.8	15	0.72	2.8	142	3	10.1	101	0.4	1	0	1	0	0	1	0	1	0	1	6	60	41	4	1	0	0	0	0	1	21.51	2.26	0	0
29	1	101	160	39.4531	36.89	93	62	11	30	99	16.2	58	8.9	13.8	0.644928	1.8	136	3.8	5.9	364	3.3	0	1	0	0	1	1	0	1	1	1	17	99	45	3	1	1	0	1	1	1	23.85	12.19	0	0
80	1	79.1	165	29.0542	37.22	60	114	66	16	100	11.2	90	7.6	12.6	0.603175	2.8	142	4.2	8.7	155	0.7	0	1	1	1	1	0	0	1	0	1	9	25	32	4	1	1	0	0	1	1	5.17	2.11	0	0
73	1	67.3	155	28.0125	36.28	88	131	62	24	89	14	178	10.6	14.7	0.721088	2.8	140	4.4	8.6	117	1	0	1	0	0	1	1	1	0	0	1	6	57	39	4	1	0	0	0	1	1	25.61	13.4	0	0
71	2	68.2	168	24.1638	35.94	107	127	54	20	91	43.3	328	5	16.4	0.304878	2.1	134	5.9	7.8	172	2.5	0	1	0	0	0	0	0	0	0	1	3	66	23	5	1	1	0	0	1	0	31.76	1.37	0	0
47	2	87.3	175	28.5061	36.72	85	145	96	20	98	9.2	278	14.7	14.6	1.00685	2.8	139	4.1	8.9	93	0.8	1	0	0	0	1	1	0	0	0	1	0	14	21	1	1	1	1	0	1	1	19.79	9.89	0	0
65	1	75.8	168	26.8566	36.56	121	118	78	22	96	8.7	320	12.6	13.3	0.947368	2.8	143	3.9	9.6	114	0.9	0	0	0	0	0	1	0	0	0	1	1	28	26	3	1	0	1	0	1	0	4.74	2.86	0	0
59	2	85.4	177	27.2591	37.56	74	116	73	18	98	13.3	295	14.1	14.5	0.972414	2.7	137	4.6	8.7	137	1	0	0	0	0	1	0	0	0	0	1	3	31	22	4	1	0	0	0	1	1	42.04	34.49	0	0
61	2	105	185	30.6793	37.17	91	135	37	29	99	13	216	6.6	20.4	0.323529	2.6	140	5.2	7.4	94	2.8	1	0	0	0	1	1	0	1	0	1	10	67	41	6	1	0	0	1	0	1	13.39	8.57	0	0
61	1	100.7	168	35.6789	37.56	105	74	61	23	95	9.6	118	8.4	13.5	0.622222	3	138	3.9	8	109	1.3	0	0	1	0	1	1	0	0	0	1	7	37	22	3	1	0	0	0	1	0	31.71	2.72	0	0
67	2	104.3	175	34.0571	36.33	56	124	60	7	100	5.7	160	11.1	13.8	0.804348	2.8	135	4.5	7.8	162	1.1	0	0	0	0	0	1	1	0	1	1	5	35	35	5	1	1	0	0	1	1	9.04	1.35	0	0
75	2	60	178	18.937	36.61	59	108	62	14	100	19.4	258	11.9	18.7	0.636364	2.9	137	3.9	9	353	1.5	0	0	0	0	0	0	1	0	1	1	7	59	35	6	1	1	1	0	1	0	12.53	1.44	0	0
76	2	106.7	180	32.9321	36.72	107	144	88	22	98	15.2	258	8	14.2	0.56338	2.9	133	4.5	8.4	256	1	0	0	0	0	0	0	1	0	1	1	1	38	26	8	1	1	0	0	0	0	11.03	1.31	0	0
66	2	96.5	180	29.784	36.72	96	94	73	24	92	25.5	528	10.3	12.5	0.824	2.6	138	5	7.8	133	0.9	0	1	0	0	1	0	0	1	0	1	12	110	54	10	1	1	0	0	1	1	11.08	11.18	1	1
43	1	85.89999999999999	168	30.4351	36.5	101	132	89	23	100	10.4	304	10.3	12.5	0.824	2.8	139	4.2	9.6	145	0.7	0	0	0	0	0	0	1	0	0	0	4	38	18	1	1	1	0	0	0	0	11.72	2.17	0	0
59	2	52.2	163	19.647	36.39	103	114	71	26	94	11.1	328	10.2	13.5	0.755556	2.8	135	4.4	8.3	109	0.6	0	1	0	0	1	1	1	0	0	1	2	42	30	4	1	1	0	0	1	0	12.26	3.23	0	0
47	1	65.6	163	24.6904	37.5	108	115	63	27	100	4.3	153	11.4	17.5	0.651429	2.1	132	4.1	7.7	88	1.1	0	1	0	0	1	0	0	1	0	1	4	40	35	8	1	1	0	0	1	1	8.04	4.24	0	0
69	1	96.8	168	34.2971	36.72	111	102	50	19	99	3.2	55	8.4	16	0.525	2.5	134	4.8	8.2	134	1.7	0	0	0	0	0	0	0	0	0	1	8	62	34	6	1	1	0	0	0	0	13.98	2.42	0	1
58	1	67.4	168	23.8804	36.22	140	108	74	28	100	24.3	265	9.5	15.6	0.608974	3	139	5.1	8.5	128	0.6	1	0	1	1	0	0	0	1	1	1	3	47	39	6	1	1	1	0	1	0	7.01	1.9	1	1
65	1	77.8	168	27.5652	37.89	109	143	96	23	97	9.4	325	12.1	20.2	0.59901	2.4	132	4.3	8.1	113	0.9	0	0	0	0	1	1	0	0	1	1	3	52	36	7	1	0	0	0	0	0	11.54	4.14	1	1
56	2	74	180	22.8395	36.39	102	104	66	31	96	23.3	290	9.5	13.9	0.683453	2.7	133	4.4	6.6	198	1.4	1	0	0	0	1	0	0	0	0	1	4	57	28	7	1	0	0	0	1	0	29.5	5.02	0	0
79	1	81.2	163	30.5619	37	79	99	46	15	87	24.7	234	9	15	0.6	2.6	141	3.8	7.2	167	1.4	0	0	0	0	0	1	1	0	0	0	5	37	34	6	1	0	0	0	1	1	20.81	2.72	0	0
73	1	80.10000000000001	175	26.1551	36.67	91	100	37	16	100	15.9	240	12.6	14.2	0.887324	2.8	141	4.2	8.3	180	0.7	0	1	1	0	0	1	0	0	0	1	3	21	32	3	1	1	0	0	1	1	9.24	7.3	0	0
56	1	95	165	34.8944	37.56	85	105	51	14	100	4.9	137	10.7	13.6	0.786765	2.8	140	3.9	8.3	103	0.5	1	0	0	0	1	0	1	0	0	0	4	23	28	4	1	0	1	0	1	0	11.32	5.38	0	0
50	2	93.8	168	33.2341	37.39	94	133	84	27	100	21.5	209	14	12.2	1.14754	2.2	132	3.6	8	121	0.7	1	0	1	0	0	0	0	0	0	1	6	28	30	0	1	1	1	0	1	1	25.51	3.11	0	0
65	1	48.3	168	17.1131	36	90	111	83	11	96	5.2	245	8.2	15.8	0.518987	2.1	138	4	8.7	71	0.2	0	0	0	0	0	0	0	0	0	0	0	32	24	5	1	1	0	0	1	0	19.88	1.85	0	1
31	2	176	180	54.321	37.11	76	105	71	19	91	8.6	178	12.6	15.1	0.834437	2.8	141	3.7	8	89	3.3	0	0	0	1	1	0	0	1	0	1	8	40	28	1	1	1	0	0	1	1	20.51	20.53	0	0
75	1	80.7	168	28.5927	37.06	82	89	45	25	98	8.3	145	9.3	14.2	0.65493	2.8	140	4.4	8.1	120	1	0	0	0	0	0	1	0	0	0	1	4	41	28	4	1	0	0	0	1	0	6.57	1.53	0	0
66	1	66.1	168	23.4198	37.33	131	116	74	28	92	5.5	207	9.6	12.2	0.786885	3	139	3.3	7.4	104	0.5	0	0	0	0	1	1	0	0	0	0	0	29	28	2	1	0	0	0	1	0	18.84	1.51	0	0
63	2	145	183	43.2978	36.56	97	159	73	24	94	19.4	142	13.5	16.7	0.808383	2.6	134	5.5	7.6	65	3.6	0	0	0	0	1	1	1	0	0	1	16	89	37	4	1	1	0	0	1	1	27.44	13.7	0	0
77	1	80.7	168	28.5927	36.11	77	129	75	19	100	6.1	203	9.1	15.2	0.598684	2.8	143	4.2	8.6	136	0.8	0	1	0	0	1	1	1	0	0	1	2	33	35	6	1	1	0	0	1	0	8.47	1.93	1	1
67	1	78.2	178	24.6812	36.78	83	155	128	18	94	18.5	398	10.5	14	0.75	2.1	142	5.1	6.8	202	3	0	1	1	0	1	0	0	0	0	1	5	50	30	4	1	1	0	0	1	1	15.16	10.55	0	0
72	1	55.4	163	20.8514	36.89	89	96	78	21	99	50.2	79	8.2	18.1	0.453039	1.8	134	3.7	7.5	122	0.9	0	0	1	0	1	0	0	1	1	1	9	42	39	11	1	1	1	0	1	0	6.21	4.34	0	0
20	1	73.2	165	26.8871	37.22	94	90	38	23	94	4.6	43	9.1	17.2	0.52907	2.4	140	3.5	7.6	111	1.6	0	0	0	0	1	0	0	0	0	1	15	102	48	0	1	0	0	0	1	1	14.22	7.08	0	0
66	1	70.2	168	24.8724	36.94	130	111	89	18	96	7.6	200	8.4	22.8	0.368421	3.1	135	4.2	9.2	111	1.8	0	1	0	0	1	1	1	0	0	1	5	63	35	7	1	0	1	0	0	1	10.16	1.27	0	0
77	2	72.23333333333333	175	23.5864	37.78	94	127	71	12	93	12	100	10	11	0.909091	4.2	140	4.3	9.1	79	1.1	0	1	0	0	1	1	0	0	0	1	4	39	26	3	1	0	1	0	1	0	12.81	4.72	0	0
50	2	94.8	168	33.5884	37.28	88	145	86	23	96	12	274	12.7	16.6	0.76506	2.8	132	4.9	6.6	106	8.7	0	0	0	0	0	1	1	0	0	1	6	47	23	2	1	1	1	0	0	0	11.87	1.83	0	0
29	2	96.7	168	34.2616	37.06	135	111	58	21	93	16	218	13.7	11.5	1.1913	2.8	142	4.5	7.8	119	0.8	0	0	0	0	1	0	0	0	0	0	0	41	29	0	1	1	0	0	1	1	8.8	4.8	0	0
60	1	64	165	23.5078	36.56	75	122	77	30	99	52	36	8.9	18.2	0.489011	2.2	130	3.5	7.5	173	3.1	1	0	0	0	1	0	1	0	0	1	18	107	40	9	1	0	0	1	0	1	24.92	24.92	1	1
61	2	83.1	175	27.1347	36.89	54	144	78	16	100	4.6	208	8.3	14.6	0.568493	3	142	3.4	8.3	102	0.7	0	1	0	0	1	1	0	0	1	1	3	17	35	3	1	0	0	0	1	1	24.38	6.59	0	0
23	1	63	168	22.3214	37.5	110	112	68	14	98	7.4	222	10.9	13.2	0.825758	2.8	139	3.3	8.3	95	0.6	0	0	0	0	0	0	0	0	0	0	1	25	17	0	1	1	0	0	1	0	8.07	1.04	0	0
71	1	70.1	157	28.4393	35.67	54	106	60	10	100	19.5	120	7.6	16.3	0.466258	1.6	131	3.4	7.7	135	0.8	0	1	0	0	0	1	0	0	0	1	7	96	41	9	1	0	0	0	1	1	7.77	1.18	0	0
55	1	180.5	163	67.9363	34.67	82	106	65	9	100	14.4	156	12.1	13.7	0.883212	2.8	136	4.9	9.4	149	1	0	0	0	0	0	1	0	0	0	1	7	45	48	3	1	1	1	0	1	1	10.96	3.87	0	0
42	2	115	168	40.7455	37.61	115	162	91	28	93	17.9	436	9.4	14.7	0.639456	2.7	136	4	7.4	99	0.7	0	0	0	0	1	0	0	0	0	1	3	34	31	0	1	0	0	0	1	1	21.51	4.49	0	0
23	1	66.3	163	24.9539	36.39	105	111	65	21	92	5	53	9.2	14.9	0.61745	2.8	141	3.6	7.6	94	0.7	0	0	0	0	1	0	0	0	0	0	6	38	28	0	1	1	0	0	1	0	9.79	2.66	0	0
76	1	78	165	28.6501	37	104	96	43	30	97	24.7	49	7.6	15.1	0.503311	2.8	141	4.4	6.8	112	1.8	0	0	1	0	1	1	0	1	0	1	11	68	31	6	1	1	0	0	1	0	13.51	5.51	0	0
61	1	81.6	163	30.7125	36.89	76	125	86	21	100	9.7	217	10.7	16.5	0.648485	2.8	135	4.2	7.7	126	0.3	0	1	0	0	1	0	0	1	0	1	6	47	36	6	1	1	0	0	1	1	33.9	24.01	0	0
77	1	66.1	152	28.6098	37.67	84	155	75	20	96	10.4	315	8.5	24.5	0.346939	3.7	138	3.7	8.9	104	0.5	0	0	0	0	0	1	0	0	0	1	1	25	31	5	1	0	1	0	1	0	7.97	2.05	0	0
43	2	75.4	168	26.7149	36.39	62	73	46	15	99	15.2	244	12.1	16.2	0.746914	2.8	137	4.4	8.6	154	0.9	1	0	1	0	1	0	0	0	0	1	5	32	31	3	1	1	0	0	0	1	3.43	2.6	0	0
39	1	144.1	163	54.2361	36.72	110	139	71	33	93	22.6	481	12.2	13.9	0.877698	2.8	139	4.9	8.1	121	0.9	0	0	0	0	0	0	0	0	0	1	1	56	33	0	1	1	0	0	1	0	17.2	2.32	0	0
41	1	80	160	31.25	36.78	98	108	68	14	100	18.4	420	9.9	13.9	0.71223	2.3	143	4.5	7.1	344	0.7	0	0	0	0	1	0	1	0	0	1	2	55	32	4	1	0	0	0	0	1	14.33	4.52	0	0
73	1	83	173	27.7323	36.67	89	124	77	20	100	18.5	287	7.5	18.2	0.412088	2.4	148	3.8	8.8	146	1.6	0	0	0	0	1	1	0	0	0	1	14	92	56	7	1	1	0	0	0	0	14.31	14.34	1	1
65	2	85.1	168	30.1516	37.56	107	95	49	28	97	21.9	224	11.9	14.6	0.815068	2	131	4.2	7.8	138	1.1	0	0	0	0	1	0	0	1	0	1	6	61	40	5	1	0	1	0	0	0	12.97	5.11	0	0
31	2	69	178	21.7776	36.78	79	141	84	21	100	11.3	365	11.3	13.8	0.818841	3.4	132	3.2	8.5	92	0.5	1	0	0	0	1	0	0	0	0	0	1	13	27	0	1	1	1	0	1	1	25.73	11.19	0	0
78	2	91	178	28.7211	36.61	123	121	93	37	95	11.4	153	16.5	13.8	1.19565	2	142	5.4	7.5	148	1.2	0	1	1	0	0	0	0	0	0	1	10	84	46	5	1	1	0	0	0	1	10.07	10.18	1	1
69	2	104.1	183	31.0848	37.11	80	134	74	19	98	13	282	14.5	15.9	0.91195	2.4	138	4.5	9	109	0.7	0	1	0	0	1	1	0	0	0	1	1	20	27	5	1	0	0	0	1	1	28.86	28.83	0	0
72	2	83	168	29.4076	36.17	73	159	47	10	100	14.7	187	10.3	23.2	0.443966	2.8	145	4.8	9.8	132	3.8	0	0	0	0	0	0	0	1	0	0	5	43	20	7	1	1	0	0	1	0	23.09	2.19	0	0
62	1	85.46666666666665	168	30.2816	37.28	64	126	75	10	99	9.7	177	12.6	13.3	0.947368	2.8	140	4	9.4	149	1	1	0	1	0	0	1	1	1	0	0	1	17	32	6	1	0	0	0	1	1	2.51	1.28	0	0
68	1	82	168	29.0533	37.06	88	135	83	13	98	7.6	204	11.9	14.2	0.838028	2.8	138	5.2	8.3	129	0.7	1	0	0	0	0	1	1	0	0	1	6	49	41	6	1	1	0	0	0	1	8.93	2.93	0	0
62	2	75.1	185	21.943	36.78	51	101	72	9	100	3.9	112	12.8	11.9	1.07563	2.8	138	3.4	8.2	77	0.9	0	1	0	0	0	0	0	0	0	0	2	25	19	2	1	1	0	0	1	0	4.58	3.69	0	0
54	1	91.6	163	34.4763	35.94	89	123	69	19	91	8.8	398	8.9	15.2	0.585526	2.7	139	3.7	7.9	109	0.7	0	0	0	0	0	0	0	0	0	1	1	41	28	2	1	0	1	0	1	0	11.56	6.53	0	0
25	1	138.4	160	54.0625	35.28	101	110	48	31	92	12.4	219	13.1	14	0.935714	2.8	139	4	7.9	97	0.8	1	0	1	1	0	0	0	0	0	1	1	38	28	1	1	0	0	0	1	0	6.6	1.59	0	0
70	1	58.3	170	20.173	37.39	83	101	79	16	98	20.5	482	12	21.7	0.552995	3	148	4.9	8.3	115	1.4	0	0	0	0	1	0	0	1	0	1	5	61	38	3	1	0	0	0	1	1	16.43	11.4	0	0
45	2	82.4	175	26.9061	39.17	96	128	73	24	100	20.9	167	10	14.8	0.675676	2.2	152	3.4	7.9	96	1.1	1	0	0	0	1	0	0	0	0	1	5	80	40	0	1	1	0	1	1	1	43.73	43.77	0	0
44	2	106.5	173	35.5842	37.61	97	196	114	21	94	9.5	132	12.8	13	0.984615	2.8	142	3.6	7.8	93	1.3	0	0	0	0	1	0	0	0	0	1	2	40	31	2	1	1	0	0	1	0	4.36	2.18	0	0
57	1	143.8	170	49.7578	37.56	80	82	57	11	81	23.5	168	12.5	14.1	0.886525	2.8	137	4.8	8	259	1.9	0	0	0	0	1	0	0	0	1	1	16	79	46	2	1	1	1	1	0	0	1.22	1.35	1	1
26	2	85.4	168	30.2579	37.94	63	150	87	20	92	136.4	63	13.4	13.4	1	3.4	139	4.3	10.2	116	1.3	0	0	0	0	1	0	0	0	0	0	6	42	26	2	1	1	0	0	0	0	31.05	1.91	0	0
58	2	77.03333333333333	175	25.1537	36.28	97	110	64	17	91	6.5	319	7.1	14.4	0.493056	3.4	140	3	7.9	89	0.7	0	1	0	0	1	0	0	0	0	1	3	43	28	2	1	1	1	0	1	0	11.74	2.88	0	0
28	2	83.46666666666665	165	30.6581	36.56	94	123	47	19	100	20.9	341	10.4	11.7	0.888889	2.8	137	5.1	7.4	154	0.8	0	0	0	0	1	0	0	0	0	0	5	46	40	1	1	1	0	0	1	1	11.68	6.07	0	0
72	1	100.65	163	37.8825	36.28	80	127	90	14	99	14	199	9.5	16.3	0.582822	2.8	139	4.2	8.4	95	0.7	1	0	0	0	1	0	1	0	0	1	5	28	37	6	1	1	0	0	1	1	8.85	1.29	0	0
70	2	80	191	21.9292	35.61	72	123	71	24	96	4.8	41	11.3	15.3	0.738562	2.5	147	4.3	6.7	197	1.2	0	1	1	0	1	0	0	0	0	1	11	74	44	4	1	1	0	1	1	1	75.81	34.86	0	0
78	2	79	170	27.3356	38.67	92	98	79	14	100	17.9	221	9.8	15.4	0.636364	3.6	128	4	7.4	651	2.9	0	1	0	1	1	0	1	1	0	1	12	84	37	9	1	1	0	0	0	1	13.64	13.63	1	1
60	1	55.3	168	19.5933	37.78	103	117	65	18	99	12.9	268	9.3	13.8	0.673913	3.1	137	3.9	8.3	106	0.6	1	0	0	0	0	0	0	0	0	0	1	30	30	4	1	1	0	0	1	0	3.94	1.11	0	0
61	1	80.7	157	32.7397	37	75	114	54	26	99	7.2	236	11.4	13.3	0.857143	2.6	144	3	8.3	146	1	1	0	0	0	1	0	0	1	0	1	4	41	39	6	1	0	0	0	0	1	14.84	3.84	1	1
74	2	89	168	31.5334	37.17	138	79	57	35	85	9.9	167	10.8	12.5	0.864	3	137	3.9	8.6	98	1	0	1	0	0	0	1	0	0	0	1	2	39	35	5	1	1	0	0	1	0	8.64	4.37	0	0
63	2	125.3	168	44.3948	36.67	91	97	63	27	95	10	135	12.7	14.1	0.900709	2.8	144	3.7	8.8	88	0.7	1	0	0	0	1	0	0	0	0	1	2	27	22	2	1	1	1	0	1	0	3.94	1.01	0	0
44	1	128	168	45.3515	38	123	146	92	24	95	13.8	224	11.8	13.9	0.848921	2.8	136	3.5	8.2	108	0.6	0	0	1	0	0	0	0	0	0	1	0	26	21	0	1	0	0	0	1	0	9.41	2.88	0	0
65	1	110.5	168	39.1511	36.44	91	97	66	22	95	9.5	247	12.4	14.1	0.879433	4	141	3.6	9.4	115	0.8	0	0	0	0	0	1	0	0	0	1	1	32	27	3	1	1	1	0	1	0	6.58	3.43	0	0
63	2	99.2	168	35.1474	34.39	102	140	74	24	100	9.3	206	12.7	12.3	1.03252	2.8	133	3.3	7.3	194	6.4	0	0	1	0	0	1	1	0	0	1	6	64	24	4	1	1	0	1	1	0	4.24	2.42	0	0
78	2	125.3	188	35.4516	36.56	77	126	111	23	96	18.5	232	11.4	15.4	0.74026	2.8	136	4.7	8.9	185	1.3	0	1	0	0	1	0	0	1	0	1	10	47	40	6	1	1	0	0	0	1	6.95	7.07	1	1
34	1	92.75	168	32.8621	36.89	112	138	60	18	100	14.2	318	9.5	19.2	0.494792	2.8	136	4.2	9.7	94	0.5	1	0	0	0	0	0	0	0	0	0	2	39	22	1	1	1	0	0	1	0	9.75	1.27	0	0
48	2	177.4	168	62.8543	36.56	77	104	44	21	98	10	153	12	15.5	0.774194	2.8	139	4.2	9.6	138	1.2	0	0	0	0	0	1	1	0	0	1	3	27	20	1	1	0	1	0	1	0	8.74	3.02	0	0
61	2	121.30000000000001	178	38.2843	36.89	86	130	79	16	98	15.7	230	14	13.3	1.05263	4.4	142	4.3	8.6	178	1.1	0	1	1	0	1	0	1	1	0	1	7	46	37	5	1	1	0	0	1	1	15.93	6.7	0	0
71	1	110	178	34.7178	37.83	72	90	50	17	95	6.8	172	11.2	13.9	0.805755	2.8	139	3.6	8.1	98	1	0	0	0	0	1	1	0	1	0	1	3	36	22	5	1	1	0	0	1	0	24.39	5.44	0	0
79	1	76	168	26.9274	36.5	83	135	85	29	100	9.7	195	10.8	13.1	0.824427	3.6	138	5.5	7.9	112	1.2	0	0	0	0	0	1	0	1	0	0	6	31	38	5	1	0	0	0	1	0	16.51	1.2	0	0
46	2	83.1	168	29.443	38.72	126	118	71	26	100	18.1	129	7.1	15.7	0.452229	1.8	145	4.7	7	109	1.4	1	0	0	0	1	0	0	0	0	1	8	53	38	0	1	0	0	0	0	0	11.85	1.48	0	0
29	2	228	175	74.449	37	102	143	88	22	98	10.8	276	11.3	12.3	0.918699	2.8	139	4.3	8.9	95	0.7	0	0	0	0	1	0	0	1	0	1	2	22	29	2	1	0	0	0	1	0	11.2	7.77	0	0
63	2	139.4	163	52.4672	36.78	103	137	57	21	99	5.3	169	7.2	15.7	0.458599	2.8	137	3.9	8.7	132	0.7	1	0	1	0	0	1	1	0	0	1	2	31	26	4	1	0	1	0	1	0	6.4	2.4	0	0
51	1	190.4	168	67.4603	38.33	107	79	22	27	94	15.6	255	8.1	14.3	0.566434	3.9	139	4.4	8.6	133	1.4	1	0	0	0	1	1	1	0	0	1	2	56	27	3	1	0	0	0	1	0	11.99	3	0	0
72	2	110	183	32.8466	36.5	128	128	104	34	95	30.2	254	16.8	13.2	1.27273	3	126	4.7	9.6	102	1.1	0	1	0	0	1	0	0	1	0	1	6	75	41	4	1	1	1	0	1	1	29.79	24.04	0	0
46	2	228.2	168	80.8532	36.06	119	131	81	31	95	12.1	326	15.7	13.4	1.17164	2.8	139	3.6	9.1	136	0.9	0	1	0	0	0	1	0	0	0	1	0	33	30	0	1	0	0	0	1	0	8.58	1.5	0	0
44	2	90	178	28.4055	36	94	140	78	23	100	22.2	66	10.5	15.3	0.686275	2.2	127	3.1	6.4	134	3.9	0	0	0	0	1	0	0	0	0	0	14	76	42	0	1	0	1	0	1	1	25.22	11.09	0	0
43	2	114.9	168	40.71	36.67	82	116	54	19	100	13.8	174	7.4	14.9	0.496644	2.8	141	4.1	8.2	98	0.9	0	0	1	0	0	0	0	0	0	1	1	20	14	0	1	1	0	0	0	0	3.78	2.02	0	0
65	2	99.9	168	35.3954	36.67	95	137	65	17	96	11.8	89	13.1	13.9	0.942446	2.9	141	3.1	8.3	361	3.6	0	0	1	0	0	1	1	0	0	1	8	47	27	7	1	0	0	0	1	0	7.23	2.39	0	0
63	2	71.5	175	23.3469	37	61	106	70	15	100	9.4	205	12.9	13.3	0.969925	2.8	138	3.4	8.1	143	0.6	0	0	0	0	1	0	0	0	0	1	3	22	33	2	1	1	0	0	0	0	31.67	31.65	0	0
66	2	98.5	168	34.8994	36.78	67	139	68	10	96	16.9	133	12.6	13	0.969231	2.8	141	3.4	6.5	90	0.7	0	1	0	0	0	0	0	0	0	1	1	26	23	2	1	1	1	0	0	0	11.66	3.07	0	0
62	1	66.4	165	24.3893	38	122	127	95	21	99	28	208	10.5	14.9	0.704698	2.8	139	3.5	7.6	170	0.7	0	0	1	0	1	0	0	1	0	1	6	37	39	3	1	1	0	0	1	1	11.7	3.05	0	0
27	1	65.1	168	23.0655	37.5	96	129	100	21	99	16.9	211	11.7	14.4	0.8125	3.8	139	4.1	8.5	187	0.7	0	0	0	0	0	0	0	0	0	0	2	26	22	0	1	1	1	0	0	0	3.51	2.79	0	0
71	1	88.5	168	31.3563	37.44	84	96	66	25	93	10	279	14.4	19.4	0.742268	2.8	134	3.3	9.2	114	1.2	1	0	0	0	1	1	0	0	0	1	6	35	29	6	1	1	0	0	1	0	16.57	2.56	0	1
35	2	105.55	178	33.3133	38.17	125	155	102	23	100	14.2	356	11.3	14.2	0.795775	2.9	138	4.1	8.5	121	0.7	0	0	0	0	1	0	0	1	0	1	1	38	35	2	1	0	0	0	1	0	6.77	3.71	0	0
79	1	46.7	155	19.4381	35.94	88	105	53	27	100	16.6	281	5.3	17.7	0.299435	1.7	141	4.7	9.7	324	2.8	0	0	0	0	1	0	1	1	0	1	7	51	35	10	1	0	1	1	0	1	22.98	21.94	1	1
55	2	61.75	177	19.7102	36.39	100	128	90	34	94	13.6	270	14.4	17.6	0.818182	3.3	138	4.8	9.6	140	0.6	0	0	0	0	1	0	0	0	0	1	8	38	47	3	1	0	1	0	1	1	25.97	3.98	0	0
78	1	64.5	168	22.8529	36.94	69	151	55	20	99	9.4	230	10.8	17.2	0.627907	2.8	143	4.3	8.9	146	2	0	0	0	0	0	0	1	0	0	1	4	60	34	10	1	0	0	0	0	0	4.86	2.86	0	0
43	2	128.1	168	45.3869	36.78	100	156	78	20	93	7	40	10.1	21.6	0.467593	4.6	130	6.2	9.5	104	3	0	0	1	0	1	1	0	0	0	1	13	70	24	4	1	1	0	0	1	0	19.97	4.15	1	1
52	2	67	170	23.1834	37.83	87	121	61	30	100	9.4	429	10.6	14.2	0.746479	2.7	150	5.6	9.5	238	0.6	0	0	0	1	1	0	1	1	0	1	3	51	37	4	1	0	0	0	1	1	47.88	19.93	0	0
72	2	103.5	168	36.6709	36.56	121	126	82	19	99	5.6	194	11.7	13.7	0.854015	2.8	141	3.7	8.4	133	0.8	0	1	0	0	0	1	1	0	0	1	0	45	30	6	1	0	1	0	1	0	3.24	1.4	0	0
60	2	64.4	168	22.8175	38.22	117	107	83	21	95	8.8	100	9.1	21.3	0.42723	2.8	152	4.2	8.6	256	0.9	0	0	0	0	0	0	1	1	0	0	3	50	31	4	1	0	0	0	1	0	4.74	1.64	0	0
70	1	138	170	47.7509	35.89	110	138	63	35	94	13.4	370	11.2	16.1	0.695652	2.8	139	3.6	9	105	1.1	0	0	0	0	1	1	1	1	0	1	4	49	30	6	1	1	0	0	1	0	5.94	1.98	0	0
78	1	65.2	157	26.4514	37.06	93	142	71	26	95	6.3	275	10.8	13.2	0.818182	3.4	141	5	9.1	114	0.7	0	0	0	0	0	1	0	0	0	0	3	37	30	8	1	0	0	0	1	0	33.43	1.92	0	0
73	2	95.3	168	33.7656	36.78	68	120	72	23	97	8.8	117	12.3	16.3	0.754601	2.8	140	3.9	8.7	223	0.5	1	0	0	0	0	0	1	0	0	1	3	44	31	6	1	0	1	0	1	0	3.03	2.23	0	1
71	2	113.95	168	40.3734	36.56	95	172	96	26	96	7.6	272	12.2	16	0.7625	2.8	142	3.9	10.6	137	1.4	0	0	0	0	0	0	1	0	0	1	1	35	30	9	1	1	0	0	1	0	4.08	2.1	0	0
75	2	70.9	168	25.1205	36.61	130	115	66	25	98	10.6	215	9.4	17.4	0.54023	2.2	139	3.6	7.9	95	0.6	0	1	0	0	1	1	0	1	0	0	2	42	32	5	1	1	1	0	1	0	17.9	1.77	1	1
74	2	80	180	24.6914	37.11	92	140	82	20	98	12.9	246	12.5	14.9	0.838926	2.8	137	3.7	8.7	108	1.5	0	0	1	0	1	0	0	0	0	1	7	77	47	8	1	0	0	0	0	1	20.05	11.21	0	0
35	2	149.5	168	52.9691	36.67	91	126	72	20	96	7.6	183	14.2	14.1	1.00709	2.8	142	4.5	9.1	121	1.1	0	0	0	0	0	1	0	0	0	1	0	24	24	1	1	0	1	0	0	0	1.64	1.59	0	0
42	1	59.5	160	23.2422	37	111	129	74	20	87	36.9	40	11.5	14.7	0.782313	1.9	137	3.1	7.4	104	1.1	0	0	0	0	1	0	0	0	0	1	11	72	47	0	1	1	0	0	1	1	35	13.17	0	0
79	2	70.7	178	22.3141	36.39	118	101	62	23	95	15.9	343	11.3	18	0.627778	2.2	136	4	8	108	0.7	0	0	0	0	1	0	1	0	0	1	5	56	36	6	1	0	0	0	1	0	20.57	2.46	0	1
28	1	96	170	33.218	37.61	101	124	69	25	98	22.5	20	7	17.3	0.404624	1.7	154	3.9	7.2	123	1.4	1	0	0	0	1	0	0	0	0	1	14	72	35	3	1	0	0	0	1	1	33.08	10.37	0	0
67	2	80.2	168	28.4155	36.94	64	109	54	12	92	3.7	168	9.5	15.9	0.597484	2.8	144	3.8	8.4	82	0.4	0	0	0	0	0	0	0	0	0	0	1	27	18	3	1	1	1	0	1	0	3.11	1.16	0	0
77	2	131	168	46.4144	38.44	71	126	57	23	93	12.7	137	10.9	14.6	0.746575	3.2	135	4.5	8	116	4	0	1	0	0	1	0	0	1	1	1	9	41	25	14	1	1	1	0	1	0	10.74	3.68	0	0
59	2	52.7	168	18.6721	36.89	126	105	79	18	89	8.8	112	7.8	18	0.433333	1.5	140	3.5	6.3	87	0.5	1	1	0	0	1	0	0	0	0	0	4	56	39	2	1	0	1	0	1	0	17.83	1.17	1	1
80	1	76	168	26.9274	36.56	54	105	43	13	99	8.2	248	8.8	18.1	0.486188	2.8	140	3.5	8.2	109	0.6	0	0	1	1	1	0	0	0	0	1	3	37	26	4	1	0	0	0	0	0	11.67	10.44	0	0
28	2	86.7	168	30.7185	37.56	103	141	75	22	88	11.3	222	12.2	13.5	0.903704	3.5	142	4.6	7.1	78	1	1	0	0	0	1	0	0	0	0	1	3	33	26	0	1	0	0	0	1	1	10.77	8.54	0	0
38	2	70	183	20.9024	36.83	91	110	62	17	98	12.4	186	11.6	12.8	0.90625	3.7	140	4.2	8.3	93	1	0	0	0	0	1	0	0	0	0	1	2	37	22	0	1	1	0	0	1	0	11.62	4.7	0	0
61	2	135.8	168	48.1151	36.72	133	110	71	30	95	14.7	245	11.1	16.6	0.668675	3.1	136	3.9	8.4	108	0.9	0	0	0	0	0	1	0	0	0	1	0	31	26	8	1	0	0	0	1	0	3.59	2.45	1	1
67	2	60	168	21.2585	36.56	129	112	51	23	96	7.9	191	10.7	17	0.629412	3.4	137	4.1	8.5	104	0.8	0	1	1	0	1	1	0	1	0	0	1	40	29	4	1	1	0	0	1	0	23.61	1.94	0	0
72	1	57.55	168	20.3904	36.22	104	133	68	16	100	6.1	144	8.1	16.3	0.496933	2.8	130	5.7	8.9	38	3	0	1	0	1	0	0	1	1	0	1	7	55	29	9	1	0	0	0	0	1	33.51	2.44	0	0
61	1	77.1	160	30.1172	37.06	96	139	76	25	96	18.9	275	10.3	13.6	0.757353	2.8	146	2.9	7.6	157	0.6	0	0	0	0	0	1	0	0	0	1	1	32	22	3	1	1	0	0	0	0	4.6	3.01	0	0
71	1	112.4	168	39.8243	36.61	78	100	65	20	99	34	291	10	18.6	0.537634	2	140	3.5	7.9	86	1.2	0	0	1	1	1	0	1	1	1	1	4	60	25	10	1	0	0	0	1	0	15.19	6.73	1	1
29	1	114.6	168	40.6037	36.94	99	111	64	40	96	11.6	189	8.6	15.1	0.569536	2.8	137	3.4	7.7	80	0.4	1	0	0	0	1	0	0	0	0	1	4	56	30	1	1	1	1	0	1	0	6.82	2.93	0	0
71	2	93.8	193	25.1819	37.61	105	126	74	35	91	27.9	25	4.3	24.2	0.177686	3.4	139	4.1	7.7	144	1.5	0	1	0	0	1	1	0	1	1	1	7	49	28	7	1	0	0	0	1	0	50.39	5.53	0	0
39	2	99.7	185	29.1308	36.89	126	123	68	23	94	22.9	596	9.1	15.1	0.602649	2.8	140	4.3	8.7	116	0.6	0	0	0	0	0	0	0	0	0	0	1	35	21	3	1	0	1	0	1	0	9.48	1.43	0	0
47	2	77.95	168	27.6183	36.56	64	108	64	27	100	26.6	225	12	12.5	0.96	2.8	144	3.9	7.9	124	1.2	0	0	0	0	1	0	0	0	0	1	2	35	34	0	1	0	0	0	1	1	29.33	8.45	0	0
55	1	47.1	168	16.6879	36.83	108	119	87	23	87	9.3	84	8.9	17.8	0.5	2.8	133	3.3	8	93	0.4	0	0	0	0	1	0	0	0	0	1	3	31	33	3	1	1	0	0	1	0	6.43	5.84	1	1
66	2	90.2	173	30.138	38.17	108	130	72	23	95	9.3	196	7.7	19.2	0.401042	2.9	143	3.8	9	176	1.1	0	0	0	0	1	1	1	0	0	1	8	75	30	10	1	1	1	0	1	0	12.7	2.98	1	1
56	1	88.9	168	31.498	37.33	122	120	74	25	92	9.7	103	11.1	14.1	0.787234	2.9	136	4.5	7.9	233	1.3	0	0	1	0	1	0	1	0	0	0	2	34	20	7	1	1	0	0	1	0	53.64	2.75	0	0
58	2	126	180	38.8889	36.5	63	93	57	15	99	15.6	180	8.6	16.1	0.534161	2.8	142	4.7	8.5	129	1	1	1	0	0	1	0	0	0	0	1	5	37	22	2	1	1	1	0	1	1	6	1.25	0	0
77	1	68.8	168	24.3764	36.5	113	78	33	24	100	27.1	330	16	15.8	1.01266	2	135	5.8	7.4	208	1.4	0	0	0	0	1	1	0	0	0	1	12	98	48	3	1	0	0	0	0	0	3.62	1.44	1	1
72	1	40.5	168	14.3495	37.44	96	109	53	26	96	22.1	201	7.5	14.8	0.506757	1.8	152	3.5	8.1	111	0.8	0	0	0	0	1	1	0	0	0	1	8	87	41	5	1	0	0	0	1	0	21.91	2.19	0	0
52	2	109.8	163	41.3264	37.83	82	104	56	26	94	10	119	15.9	14.5	1.09655	2.6	145	4	8.9	99	0.5	0	1	1	0	1	0	0	0	0	1	11	38	34	4	1	1	0	0	0	1	26.8	26.8	0	1
61	1	86.4	166	31.3543	37	90	106	63	19	97	23.2	200	11.6	14.2	0.816901	2.8	142	3.6	8.3	106	0.7	0	0	0	0	0	0	0	0	0	0	1	12	21	5	1	1	0	0	0	0	3.44	1.02	0	0
56	2	94.6	183	28.2481	37	92	121	70	27	96	17.7	165	9.2	15.8	0.582278	2.5	149	3.2	7.9	188	1.8	0	1	0	0	1	0	0	0	0	1	3	58	45	7	1	1	0	0	0	0	10.91	11.05	1	1
69	1	84.2	168	29.8328	36.78	108	136	78	29	94	19.7	492	10.3	13.9	0.741007	2.1	137	3.5	7.9	151	0.4	0	0	0	0	0	0	0	0	0	1	0	36	30	2	1	1	0	0	1	0	12.55	2.51	0	0
59	2	86	168	30.4705	37	97	137	90	24	100	4.1	12	7.4	17.7	0.418079	3.6	139	4.7	8.8	208	3.3	0	0	0	0	0	0	0	0	1	0	10	47	20	2	1	1	1	0	0	0	6.03	1.11	0	0
67	1	86	157	34.8899	39.22	73	173	66	15	87	23.7	175	10.1	14.6	0.691781	2.8	136	4.6	8.8	230	2.3	0	0	0	1	1	0	1	1	0	0	2	46	23	8	1	0	0	0	1	0	10.88	1.24	0	0
67	1	71	168	25.1559	36.83	89	80	29	13	93	3.2	224	9.8	13.3	0.736842	2.8	147	4.5	8.1	82	0.5	1	0	1	0	0	0	0	0	0	0	3	27	20	2	1	0	0	0	0	0	17.53	1.4	0	0
56	1	67.05	163	25.2362	36.89	91	99	54	19	100	8.7	119	7.7	18.4	0.418478	4	139	4	8	124	0.7	0	1	1	0	1	1	0	0	0	1	4	47	29	3	1	0	0	0	1	1	18.69	3.19	0	0
65	2	105.4	180	32.5309	37.22	97	150	74	16	100	3.2	22	7.9	15.3	0.51634	3.8	143	3.7	8.8	77	1.8	0	0	0	0	1	0	1	0	0	1	7	32	26	9	1	1	0	0	0	0	17.71	3.5	0	0
21	2	117.5	168	41.6312	37.22	112	117	68	26	94	36	115	6.8	27	0.251852	3.2	133	5.2	8.4	162	1.3	0	0	1	0	1	0	0	0	0	0	4	39	21	0	1	1	0	0	1	0	11.88	3.89	0	0
66	2	117.5	168	41.6312	37.28	106	133	92	23	96	8.7	168	11.9	12.8	0.929688	3.7	139	3.5	9.4	186	1	0	0	0	1	0	0	1	1	0	1	1	35	24	4	1	1	1	0	1	0	12.93	9.74	0	0
60	1	70	168	24.8016	36.44	95	145	87	13	100	26.9	414	12.6	13.4	0.940299	3.1	141	3.4	9.2	144	0.9	1	0	1	0	1	0	0	0	1	1	5	48	43	2	1	1	0	0	1	1	24.15	20.23	0	0
60	2	81.9	168	29.0179	37.33	102	136	102	22	95	14.1	209	13.4	12.2	1.09836	2.8	136	3.9	8.4	104	0.9	0	1	1	1	0	0	0	0	0	1	1	42	30	1	1	1	0	0	1	0	3.96	1.6	0	0
25	1	99.2	163	37.3367	36.72	117	143	77	28	94	6	202	10.3	14	0.735714	2.9	147	4.1	8.1	122	0.7	0	0	0	0	1	0	0	0	0	1	10	80	46	0	1	0	0	0	1	1	18.98	13.92	0	0
59	1	121.5	178	38.3474	37.33	81	115	57	18	99	15.9	278	9.7	16.4	0.591463	2.9	136	3.9	9.1	145	0.7	1	0	1	0	0	1	0	1	0	1	3	37	36	3	1	1	0	0	1	0	16.1	8.08	0	1
32	1	73.66666666666667	168	26.1007	37.28	132	110	74	20	97	4.4	134	8.6	16.7	0.51497	1.7	131	3.5	7.1	219	0.6	0	0	0	0	1	0	0	0	0	1	3	40	23	0	1	1	0	0	1	0	38.28	1.89	0	0
69	1	84	168	29.7619	38.67	146	98	60	31	99	15.4	150	8.7	14.3	0.608392	1.9	134	5.4	6.9	161	5	0	0	0	0	1	0	1	0	1	1	12	98	53	5	1	0	0	1	1	0	115.63	32.77	0	0
48	2	152.1	185	44.4412	37	100	145	75	18	93	10.6	514	9.4	15.1	0.622517	2.8	136	4	8.4	173	1	0	0	0	0	1	0	1	0	0	1	2	25	21	1	1	1	0	0	1	1	10.66	2.88	0	0
80	1	55.5	168	19.6641	36.89	84	141	55	22	98	344.4	246	6.8	19.5	0.348718	3.2	142	3.6	8.9	117	1.1	0	1	0	0	1	1	0	0	0	1	5	67	37	8	1	1	0	0	1	0	19	3.16	0	0
71	2	84.7	168	30.0099	36.61	66	88	49	11	99	2.5	8	7	18.4	0.380435	2.8	137	3.7	8.6	92	1.3	0	0	1	0	0	1	0	0	0	1	12	74	35	5	1	0	1	0	0	0	9.78	1.21	1	1
73	1	82.5	163	31.0512	37.44	93	117	74	16	95	12.4	199	10.7	16.6	0.644578	2.9	142	4.1	10.1	107	0.7	0	0	1	0	1	0	0	0	0	1	3	37	33	5	1	1	1	0	1	1	9.42	5.59	0	0
51	1	43.6	142	21.6227	35.67	86	147	87	16	96	1.5	183	10.6	17.8	0.595506	2.5	143	3.9	6.6	162	0.9	1	0	0	0	1	0	0	0	0	1	5	62	36	2	1	1	1	0	0	1	22.5	22.57	1	1
28	2	73	168	25.8645	36.67	103	132	75	22	86	10.8	185	15.6	12.5	1.248	2.8	140	3.9	8.8	119	1.1	0	0	0	0	0	0	0	0	0	1	2	42	29	1	1	0	1	0	1	0	6.72	2.97	0	0
36	2	81.1	168	28.7344	37.06	63	123	97	18	100	7.6	212	11.4	14.9	0.765101	2.8	141	4.5	9.3	94	1.3	1	0	1	0	0	1	0	0	0	1	1	22	13	0	1	0	1	0	0	0	1.98	1.23	0	0
49	2	89	168	31.5334	37.11	114	117	78	20	94	12.5	243	13	13	1	2.8	137	3.7	8.6	136	1	0	0	0	0	0	0	0	0	0	1	2	31	23	3	1	0	0	0	1	0	5.82	1.53	0	0
36	2	77	178	24.3025	36.39	91	105	77	27	99	10.1	148	9.1	13.7	0.664234	2	128	5.4	8.2	109	5.1	1	0	0	0	1	0	0	0	0	1	6	66	31	0	1	1	0	0	0	0	45.89	1.05	0	0
59	2	130	168	46.0601	35.83	84	155	94	18	98	6.6	305	11.8	13.4	0.880597	3.2	138	4.3	8.4	144	1	0	0	0	0	1	0	0	0	0	1	1	14	32	4	1	0	0	0	1	1	39.68	1.89	0	0
69	1	87	168	30.8248	37.22	86	129	55	19	99	7.4	278	10	13.8	0.724638	2.8	140	4.2	8.5	224	1.6	0	0	1	0	1	0	1	0	0	1	5	53	35	7	1	0	0	0	1	0	6.63	1.51	0	0
77	1	50.5	168	17.8926	36.72	89	108	59	22	84	18.5	16	8.8	21.5	0.409302	3.8	141	4	9.7	111	0.8	0	1	0	0	0	1	0	0	0	0	6	35	33	4	1	0	0	0	1	0	7.6	1.64	0	1
73	1	160	155	66.5973	37.11	60	141	63	20	100	9.3	182	12.2	14.6	0.835616	3.1	145	3.6	8	145	0.6	0	0	1	0	1	1	0	0	0	1	1	22	34	4	1	0	0	0	1	1	13.57	3.93	0	0
57	2	79.3	168	28.0967	36.61	71	107	57	NULL	95	13.2	210	11.5	13	0.884615	2.8	139	4.4	8.3	148	1.6	0	0	1	0	0	0	0	0	0	0	3	37	22	4	1	1	0	0	0	0	2.54	2.07	0	0
50	2	97.9	175	31.9673	36.72	125	162	88	13	97	14.6	183	16.7	13.9	1.20144	3.1	139	5.6	8.2	167	0.8	1	1	0	0	1	0	0	0	0	1	9	98	59	1	1	1	0	0	1	1	70.48	42.78	0	0
73	1	64	163	24.0882	36.44	92	104	77	14	100	6.1	76	6	17.3	0.346821	2.8	142	4.5	8.3	231	1	0	0	0	0	0	1	0	0	0	1	4	29	40	5	1	1	1	0	1	0	9.37	3.29	0	0
42	2	67.5	168	23.9158	36.56	90	92	58	20	99	5.6	162	6	23.5	0.255319	2.8	134	5	8.9	78	4.7	0	1	1	0	0	0	0	0	0	1	5	47	31	2	1	1	0	0	1	0	4.04	2.28	0	0
56	1	87	168	30.8248	36.94	135	109	94	12	97	6	224	8.1	14.3	0.566434	2.8	133	4.5	8.5	99	3.4	0	1	1	0	0	0	1	0	0	1	4	50	28	7	1	1	0	0	0	0	7.95	2.94	0	0
59	1	62.75	168	22.2329	36.67	96	132	85	24	96	3.9	101	15.7	17.5	0.897143	3.2	141	5.9	7.7	159	0.6	1	0	0	0	0	1	0	1	0	0	5	24	31	3	1	0	0	0	1	0	5.52	2.79	0	0
43	1	229.66666666666666	170	79.4694	36.44	68	158	101	20	94	11.5	306	7.3	18.6	0.392473	2.8	136	6.4	8.6	67	2.9	1	0	0	0	1	1	0	1	0	1	9	59	40	1	1	0	1	0	1	1	5.69	5.56	0	0
62	2	165	168	58.4609	36.83	98	98	55	11	98	26.1	393	7.7	19.6	0.392857	2	136	5.3	8.4	129	1	0	0	0	0	0	0	1	0	0	1	1	52	26	6	1	0	0	0	1	0	6.88	1.22	0	0
71	2	99	168	35.0765	36.78	71	133	59	10	99	9.6	152	7.4	18.5	0.4	3.3	131	5.2	8.3	107	6.8	0	1	0	0	0	0	1	1	0	1	7	39	18	8	1	1	0	0	0	0	52.8	2.66	0	0
56	2	62.5	168	22.1443	38.06	132	156	60	21	98	8.7	322	6.6	21.8	0.302752	2.8	143	3.5	8.5	193	0.8	0	0	0	0	1	0	1	0	1	0	3	43	42	12	1	1	0	0	0	0	10.08	2.34	1	1
59	2	159	178	50.1831	37	93	86	58	20	98	6.2	50	10.3	16.6	0.620482	3.2	134	4.1	7.4	104	1.6	0	0	0	0	1	1	0	0	0	1	6	52	33	4	1	1	0	0	1	0	8.91	2.05	0	0
65	1	120	168	42.517	36.89	77	136	69	14	94	5	222	11.8	13.9	0.848921	2.8	141	4.2	9.4	264	1.1	0	0	0	0	0	0	1	0	0	0	3	44	21	5	1	1	1	0	0	0	6.59	1.02	0	0
64	2	113.3	168	40.1431	36.67	94	144	68	21	95	22.1	329	9	15.3	0.588235	2.8	128	3.9	12	198	0.9	1	1	0	0	0	1	0	1	0	1	1	38	27	6	1	0	0	0	1	0	26.41	1.62	0	0
42	1	79.4	157	32.2123	37.94	126	132	78	32	100	19	432	8.7	17.1	0.508772	2.6	132	4.8	8.3	77	0.4	1	0	0	0	1	0	0	0	0	1	9	58	40	0	1	1	0	0	1	1	29.66	11.43	0	0
60	1	87	165	31.9559	36.11	71	153	68	23	100	9.5	262	7.9	17.4	0.454023	2.8	131	5.8	11.4	216	1.1	0	0	1	0	1	1	1	0	0	1	4	38	34	5	1	0	0	0	1	1	4.39	5.39	1	1
66	1	63.7	163	23.9753	36.89	74	126	66	17	100	3.7	238	9.8	13.4	0.731343	1.9	137	5.8	8.7	133	1.9	1	1	0	0	1	0	1	0	0	1	9	60	43	3	1	1	0	1	1	1	50.16	28.08	0	0
56	2	117.8	168	41.7375	37.89	115	122	70	20	98	8.9	223	14.8	14.3	1.03497	3.9	140	3.8	8.8	292	1.6	0	0	0	0	1	0	1	0	0	1	5	28	30	3	1	1	0	0	0	1	28.85	4.65	0	0
71	2	95.7	168	33.9073	37.06	121	89	76	16	91	8.4	162	8.1	16.4	0.493902	3.2	142	5.1	8.7	142	2.7	0	1	0	0	0	0	0	1	1	1	4	85	43	7	1	1	1	0	1	0	11.9	4.8	0	0
66	2	93.8	168	33.2341	37.06	79	122	82	24	99	8	135	12.1	15.8	0.765823	2.8	140	3.8	8.8	120	1	0	0	0	0	0	0	0	0	0	1	1	24	20	2	1	1	0	0	1	0	3.12	1.07	0	0
67	2	93.3	193	25.0477	38.72	146	101	56	22	99	0.3	5	5.7	14.4	0.395833	2.8	133	4.2	7.4	127	0.9	0	1	1	0	1	0	0	0	0	0	5	65	25	5	1	0	0	0	1	0	43.99	2.42	0	0
49	1	97.2	168	34.4388	36.94	81	137	83	15	95	6.8	218	8	18.3	0.437158	2.8	137	4	8.9	91	0.9	0	0	0	0	0	0	0	0	0	1	1	34	32	0	1	1	1	0	0	0	1.9	1.39	0	0
63	2	69.75	173	23.3052	36.78	107	141	83	14	95	12.5	140	9.4	14.9	0.630872	2.8	139	5.9	8.7	185	4.4	0	0	1	0	1	0	1	1	0	1	7	65	22	9	1	1	0	1	1	1	15.6	11.41	0	0
24	1	43.5	168	15.4124	36.83	76	102	64	21	96	8.3	279	9.3	15.4	0.603896	2.1	139	3.3	7.7	91	0.2	0	0	0	0	0	0	0	0	0	0	2	45	28	0	1	0	0	0	0	0	61.07	1.02	0	0
34	1	61	155	25.3902	NULL	112	NULL	NULL	33	95	14.1	183	12	18.6	0.645161	2.3	148	3.8	6.8	150	1.6	0	0	1	0	1	0	0	0	0	1	13	89	37	1	1	0	0	0	0	1	2.98	3.02	1	1
40	1	57.3	165	21.0468	37.67	119	102	69	22	100	16.5	167	17.5	14.6	1.19863	2.8	137	4	8.4	86	0.9	0	0	0	0	1	0	0	0	0	1	2	29	27	0	1	0	0	0	1	1	12.47	7.49	0	0
52	1	57	165	20.9366	37.22	97	133	76	39	97	16.8	224	10.8	17.4	0.62069	3	145	4.3	8.4	35	1.7	1	0	0	0	1	1	0	0	0	1	11	62	42	4	1	0	0	1	1	1	40.85	18.92	0	0
51	1	98.8	168	35.0057	36.44	102	114	74	16	100	8.2	141	8.8	17.3	0.508671	3.5	139	3.8	8.4	134	0.7	0	0	0	0	0	0	0	0	0	0	4	39	23	7	1	1	0	0	1	0	18.92	1.76	0	1
78	2	61	168	21.6128	36.89	97	108	70	16	98	12	100	10	11	0.909091	2.8	130	3.5	7.8	118	3.6	0	0	0	0	1	0	0	0	0	1	5	54	40	3	1	1	1	0	0	0	2.55	1.72	1	1
70	2	79.8	168	28.2738	37.06	114	124	85	19	95	25.2	72	6.8	15.7	0.433121	2.1	136	3.5	7.5	194	0.8	0	1	0	0	1	1	0	1	1	1	2	37	28	6	1	0	0	0	1	0	43.31	6.84	0	1
29	1	60.4	157	24.504	36.67	76	142	105	11	98	4.8	188	16.7	14.4	1.15972	3.5	140	3.7	8.7	86	0.6	1	0	0	0	0	0	0	0	0	0	0	23	18	0	1	0	1	0	0	0	7.47	5.93	0	0
69	2	85.6	168	30.3288	37.33	148	126	53	30	95	12	100	10	11	0.909091	2.8	130	3.5	7.8	118	3.6	0	1	0	0	0	0	0	1	0	1	0	38	35	9	1	1	0	0	1	0	3.26	3.41	1	1
68	2	101.4	168	35.9269	37.06	64	139	91	18	100	8.6	118	11.4	14.3	0.797203	2.8	142	3.3	8.3	105	0.9	1	0	1	0	0	1	0	0	0	0	5	44	34	3	1	0	0	0	1	0	5.89	2.12	0	0
38	2	125	183	37.3257	38.83	95	163	78	21	100	26.5	300	14.4	13.4	1.07463	3.7	142	3.6	8	199	0.9	0	0	0	0	1	0	0	0	0	1	5	93	43	1	1	1	1	0	0	1	24.42	17.54	0	0
67	2	81	168	28.699	36.33	68	110	64	14	98	16.7	42	11	16.1	0.68323	3.3	136	3.5	8.6	188	0.6	0	0	1	0	1	0	1	0	1	1	6	50	35	7	1	1	0	0	1	0	9.11	2.34	0	0
68	2	90.1	180	27.8086	37.22	119	100	72	26	96	9.3	260	7.2	15.5	0.464516	0.9	135	4	6.5	82	0.6	0	0	1	0	0	0	0	0	0	0	1	40	20	3	1	1	1	0	1	0	24.71	1.59	0	0
60	1	96.4	168	34.1553	36.5	48	124	70	15	96	8.8	294	11.6	13.7	0.846715	3.6	137	4.2	9	118	1.5	0	0	1	0	0	0	1	1	1	1	6	59	23	6	1	1	0	0	0	0	12.08	1.65	0	0
50	2	116.25	168	41.1884	36.67	85	137	101	22	99	13.9	222	15.1	12.7	1.18898	2.8	138	4.4	8.2	115	0.9	1	0	1	0	0	0	0	0	1	1	0	19	19	1	1	0	0	0	1	0	3.83	2.17	0	0
74	2	97	173	32.41	36.56	106	97	83	20	100	9.2	178	8.5	16	0.53125	2.8	135	6	7.8	136	1.7	0	0	1	0	1	1	0	0	0	1	8	85	39	5	1	0	0	1	0	1	2.69	2.04	1	1
74	2	126.2	173	42.1665	37	75	119	63	24	95	14.3	48	8.2	18.1	0.453039	3.3	139	3.4	8.1	139	1.7	0	1	0	0	1	0	0	1	0	1	14	74	42	6	1	0	1	1	1	1	26.35	26.44	1	1
67	2	111.3	178	35.1281	37	94	114	70	14	93	7.2	210	11.8	13.5	0.874074	2.2	134	3.4	8.6	183	0.6	0	0	1	0	1	1	1	0	0	1	1	51	33	4	1	0	0	0	1	1	25.39	10.94	0	0
67	1	89.7	168	31.7815	37.44	81	105	65	20	97	18.5	133	9.4	15.9	0.591195	2.1	140	3.9	8.2	203	1	0	0	0	0	1	0	0	1	0	1	8	53	36	6	1	0	0	0	1	1	22.93	9.24	0	0
51	1	90	168	31.8878	36.44	90	103	52	20	92	10.6	217	11.5	13.5	0.851852	2.8	141	3.8	9.4	132	0.7	0	0	0	0	0	0	0	0	0	1	2	37	25	1	1	0	1	0	1	0	3.36	1.9	0	0
79	2	85.75	178	27.0641	37.11	74	88	49	11	99	14.1	178	8.4	12.8	0.65625	2.8	140	4.6	8.5	133	0.6	1	0	0	0	1	1	0	0	0	0	8	25	27	5	1	0	0	0	1	0	9.9	2.11	0	0
64	2	83.89999999999999	175	27.3959	37.33	74	113	69	16	100	13.5	91	10.1	15.2	0.664474	3.2	136	4.2	8.6	248	1.2	0	0	1	0	1	0	1	0	0	1	8	42	32	11	1	0	0	0	0	0	12.95	3.39	0	0
49	2	100.1	170	34.6367	36.83	90	111	69	29	95	13.1	260	12.7	14.2	0.894366	3.3	136	3.1	8.4	102	0.6	1	0	0	0	1	0	0	0	0	1	4	37	29	0	1	0	1	0	1	1	11.75	4.81	0	0
70	1	75	165	27.5482	36.5	67	84	43	21	100	7.3	100	10.1	14.4	0.701389	2.8	139	3.5	8.3	116	0.8	0	1	0	0	0	0	1	0	0	1	3	46	37	5	1	1	0	0	1	1	20.86	6.99	0	0
77	2	67.35	168	23.8627	38	97	127	66	19	97	38.8	318	10	13.5	0.740741	2.8	140	4.2	8.5	168	1	0	0	0	1	1	0	0	0	0	1	8	58	31	3	1	1	0	0	1	0	10.61	2.43	0	0
49	2	90.3	168	31.994	36.56	120	174	99	25	100	15.8	141	8.9	14.2	0.626761	2.8	135	7.6	10.5	417	12.8	0	0	0	1	1	0	1	1	1	1	15	106	46	6	1	0	0	1	0	1	9.01	9.09	1	1
66	2	76.9	170	26.609	36.67	74	120	75	16	94	14.8	195	13.7	12.7	1.07874	2.8	136	4.6	8.9	169	0.9	0	0	0	0	0	0	0	0	0	1	2	27	26	2	1	1	0	0	1	0	4.94	2.13	0	0
64	2	98.2	168	34.7931	36.78	115	124	91	25	98	12.8	141	7.5	16	0.46875	2	140	4.6	8.5	120	2.1	0	0	0	0	1	0	0	1	1	1	5	69	46	8	1	0	0	0	0	0	24.11	1.4	0	0
21	2	114	188	32.2544	35.83	116	138	75	31	95	15.6	276	13.6	13.3	1.02256	2.8	138	4	8.7	113	1.2	1	0	0	0	0	0	0	0	0	1	2	51	39	1	1	1	0	0	1	0	4.42	1.72	0	0
57	2	118	168	41.8084	36.89	91	130	79	21	97	3.6	106	8	17.9	0.446927	2.6	139	4.3	7.6	113	1.4	1	0	0	0	0	0	0	0	0	1	3	27	27	5	1	0	0	0	1	0	21.89	1.19	0	0
50	2	127.5	183	38.0722	36.78	130	122	96	19	98	10.3	271	16.6	14.9	1.11409	3.6	136	6.3	9.3	93	1.8	0	1	0	0	0	0	0	1	0	1	5	45	34	1	1	1	0	0	1	0	8.75	5.01	0	0
64	1	89.9	152	38.911	NULL	62	NULL	NULL	36	98	15.1	389	9.6	17.8	0.539326	1.7	148	4.2	7.8	111	2.4	0	0	1	0	1	0	0	1	0	1	7	76	43	6	1	0	1	0	0	0	1.67	1.74	1	1
76	2	70	168	24.8016	36.61	72	139	65	15	99	1.7	174	13.2	14.6	0.90411	2.9	138	4.1	7.4	85	0.7	0	0	0	0	1	0	0	0	1	0	7	42	42	5	1	1	0	0	1	1	22.44	2.61	0	0
55	1	86	168	30.4705	38.39	113	145	89	16	100	13.4	256	11.1	14.2	0.78169	2.8	139	2.7	7.7	158	0.5	1	0	0	0	0	0	0	0	0	1	6	58	42	2	1	1	0	0	1	1	7.21	2.28	0	0
64	2	123.6	168	43.7925	36.61	94	150	101	24	95	11.4	24	14	16.1	0.869565	2.9	134	3.7	8.6	127	1.5	0	0	0	0	0	0	0	0	0	1	10	58	29	5	1	0	1	0	0	0	7.87	1.7	1	1
61	1	113.7	180	35.0926	36.39	67	114	73	30	90	28.8	269	11.4	14.9	0.765101	3.2	135	5.3	9.6	250	1.6	0	0	0	1	1	0	0	1	0	1	6	73	40	3	1	1	0	0	1	1	12.28	12.5	1	1
65	2	102	168	36.1395	36.94	90	143	76	20	93	7.9	304	9.4	15.9	0.591195	3	142	4.2	9.6	84	0.8	0	1	0	0	1	0	0	1	0	0	2	30	30	3	1	0	0	0	0	0	22.59	1.1	0	0
29	1	94	168	33.305	37	122	163	101	18	99	9.5	364	10.7	13.8	0.775362	2.8	139	4.2	9.1	82	1	0	0	0	0	0	1	0	0	0	0	1	23	19	0	1	0	0	0	0	0	11.86	2.02	0	0
65	1	63.6	157	25.8023	36.56	106	104	69	23	99	11.6	168	7	12.7	0.551181	2.8	138	3.9	7.6	165	0.7	0	0	0	0	0	1	0	0	0	0	4	32	26	8	1	0	0	0	1	0	5.25	1.06	0	0
33	2	88	168	31.1791	37.11	113	112	66	22	97	20.8	149	8.1	25.1	0.322709	2.2	139	4.2	8	83	0.8	0	0	0	0	1	0	0	0	0	1	7	50	31	7	1	1	1	0	0	0	29.64	1.06	0	1
65	1	47	152	20.3428	36.61	110	106	81	27	100	19.2	225	10.4	14.6	0.712329	3.3	137	4.2	8.3	208	0.8	0	0	0	1	0	0	1	1	1	1	3	60	34	12	1	0	0	0	1	0	21.8	12.93	0	0
22	1	74.2	168	26.2897	37.67	122	120	68	19	93	14.7	138	10.5	15.4	0.681818	2.8	134	2.8	7.8	107	0.9	1	0	0	0	1	0	0	0	0	0	2	25	23	0	1	0	0	0	1	0	12.53	2.7	0	0
29	1	67.6	168	23.9512	37.44	106	140	95	15	100	4.6	206	10.4	15.4	0.675325	2.8	137	3.5	8.4	141	0.7	0	0	0	0	0	0	0	0	0	0	2	21	19	0	1	1	0	0	1	0	4.27	1.34	0	0
67	2	76.5	173	25.5605	36.83	84	94	63	14	100	10.5	122	10.2	14.4	0.708333	2.8	141	3.9	8.1	171	0.8	0	1	0	0	1	1	0	1	0	1	2	23	29	3	1	0	0	0	1	1	6.2	4.46	0	0
46	1	64.9	168	22.9946	36.78	99	102	64	19	100	5.5	256	10.4	16.2	0.641975	2.8	146	3.8	7.7	149	0.4	0	1	0	0	0	1	0	0	0	0	1	42	27	3	1	0	1	0	1	0	3.6	2.67	0	0
45	2	132.6	183	39.5951	37.06	71	143	92	28	99	13.6	492	9.3	14.3	0.65035	2.8	138	4.5	8.7	163	0.6	0	0	1	0	1	1	1	0	0	1	4	18	23	6	1	1	0	0	1	1	27.12	5.97	0	0
51	2	89.4	168	31.6752	36.44	117	97	66	17	99	7.9	225	12.6	15.9	0.792453	3.5	136	4.6	8.5	165	1.1	0	0	1	0	0	0	1	0	0	0	1	35	20	3	1	1	0	0	1	0	5.73	1.73	0	0
74	1	75.3	165	27.6584	36.44	49	123	41	18	99	7	148	11.6	13.2	0.878788	3.1	135	3.9	7.9	260	1	0	0	0	0	1	0	0	0	0	1	11	68	39	3	1	1	1	0	1	1	43.76	19.05	0	0
41	1	73.8	163	27.7767	37.56	80	133	84	16	92	16.7	247	13	14	0.928571	2.3	137	4	9.1	153	0.5	1	0	0	0	0	0	0	0	0	1	0	33	30	2	1	0	0	0	1	0	29.25	17.31	0	0
54	2	79.15	168	28.0435	36.78	87	98	62	20	98	19.7	149	7.2	15.9	0.45283	1.8	140	3	6.9	156	0.4	0	0	0	0	1	0	0	1	0	1	8	46	35	6	1	1	1	0	1	1	10.64	6.06	0	1
32	2	54.4	163	20.475	37.06	88	154	99	16	98	54.4	343	6.8	20.5	0.331707	2.9	136	3.3	8.6	190	1.4	0	0	1	0	1	0	0	0	1	0	7	53	32	3	1	0	1	0	0	1	9.46	4.85	0	0
39	2	92	163	34.6268	36.94	93	129	69	14	95	4.3	100	9.3	22.6	0.411504	3.8	146	3.5	8	201	0.5	0	0	0	0	0	0	0	0	0	1	6	39	28	4	1	0	1	0	1	0	13.88	2.12	0	0
50	2	66.4	168	23.5261	37.44	103	130	63	20	91	3.4	73	12.6	13.2	0.954545	3.5	136	4.5	8.8	99	0.5	0	0	0	0	0	0	0	0	0	0	5	38	18	9	1	0	0	0	1	0	3.91	1.06	0	0
64	2	86.7	180	26.7593	36.72	89	156	104	17	94	10.2	222	12.9	13.2	0.977273	3.8	135	4	8.6	81	0.7	0	0	1	0	1	1	1	0	0	1	1	21	37	5	1	1	0	0	1	1	3.93	1.51	0	0
75	2	110	188	31.1227	37.56	138	147	84	39	96	15.1	307	13.7	14.4	0.951389	2.2	143	3.3	7.7	180	1.3	0	1	0	0	1	1	0	0	0	1	2	63	35	6	1	1	0	0	1	1	17.98	13.6	1	1
30	1	103	168	36.4938	37	118	108	78	48	99	11.8	294	9.6	15	0.64	2.8	137	4.6	9.1	166	0.9	0	0	0	0	0	0	0	0	0	1	1	43	32	1	1	1	1	0	1	0	4.67	4.63	0	0
32	1	54.6	152	23.6323	36.44	119	100	69	24	91	11.7	191	8.8	19.6	0.44898	3.4	133	5	8.5	91	1	0	0	0	0	1	0	0	0	0	1	11	64	29	5	1	1	1	0	0	1	21.81	4.84	0	0
69	2	107	170	37.0242	36.5	80	88	57	13	100	23	140	9.3	14.7	0.632653	2.8	135	6.5	7.9	108	0.9	0	1	0	0	0	1	0	1	0	1	8	44	31	3	1	1	0	0	1	1	13	6.34	0	0
76	2	88.3	168	31.2854	36.72	87	132	89	17	96	5.2	296	12.2	15.8	0.772152	3.5	142	2.5	8.6	77	0.7	0	1	0	0	1	0	0	1	0	0	2	23	22	7	1	0	0	0	0	0	76.59	1.03	0	0
68	1	83	170	28.7197	37.67	90	108	68	16	98	11.4	267	11.3	13.2	0.856061	3.2	139	4.9	9.2	112	0.8	0	0	0	1	1	1	0	0	0	1	5	31	33	5	1	1	1	0	1	1	59.14	40.61	0	0
54	1	63.1	168	22.3569	38	115	122	76	17	97	19.2	256	11.3	12.4	0.91129	2.8	144	3.7	7.8	104	0.7	0	0	0	0	0	0	0	0	0	0	1	28	25	2	1	1	1	0	1	0	2.59	1.35	0	0
32	1	110.3	165	40.5142	36.94	118	107	67	27	94	9.2	355	8.4	16.6	0.506024	2.8	138	3.8	8.6	271	0.9	0	0	0	0	0	0	1	0	0	1	1	30	33	2	1	1	0	0	1	0	3.19	1.27	0	0
52	1	57.6	152	24.9307	37.83	123	85	59	32	100	14	153	7.4	20.7	0.357488	3.2	138	3.5	8.2	156	1.9	0	0	0	0	1	0	0	0	1	1	6	65	47	9	1	0	1	1	1	1	65.66	10.95	0	0
60	2	74.2	172	25.0811	37.56	65	138	71	14	100	14.1	240	13.7	14.6	0.938356	4.4	131	4.6	9.1	104	0.9	1	0	0	0	1	1	0	0	0	1	5	63	40	5	1	0	0	0	1	1	38.11	26.05	0	0
80	1	82	168	29.0533	36.61	99	114	86	21	96	7.2	166	12.5	13.8	0.905797	2.8	141	4.3	9.1	122	0.7	0	0	0	0	0	1	0	0	0	1	1	43	31	3	1	1	0	0	1	0	4.54	1.87	0	0
76	1	51.8	154.94	21.5776	37	93	127	68	14	96	9.6	262	11.1	14	0.792857	3.1	133	4.1	9.2	112	0.8	0	1	1	0	0	0	0	0	0	1	1	28	24	4	1	1	1	0	0	0	13.96	10.8	0	0
69	2	100.5	152	43.499	37.11	97	115	54	16	100	22.4	176	11.4	13.6	0.838235	2.8	135	4.5	8.4	112	1	0	0	0	0	0	1	0	0	0	1	9	33	38	3	1	0	1	0	1	1	7.99	4.21	0	0
59	1	107.2	163	40.3478	36.44	126	119	80	24	94	18.9	216	7.4	25.1	0.294821	4	137	5	9.4	508	1.3	0	0	1	0	0	1	1	0	1	1	10	107	43	10	1	0	1	0	1	0	2.33	1.12	1	1
73	2	112	168	39.6825	36.56	83	146	99	24	93	3.6	181	9.5	17.1	0.555556	2.8	148	3.7	8.7	105	1.1	0	0	1	0	0	0	0	1	0	1	2	39	21	5	1	1	1	0	1	0	4.39	1.51	0	0
58	1	42.73333333333333	152	18.4961	36.44	92	152	88	28	100	14.9	234	11	15.4	0.714286	2.8	141	3.4	9.3	158	0.6	0	0	0	0	0	1	0	0	0	0	1	36	39	5	1	1	0	0	0	0	0.99	1.01	1	1
77	1	67.5	160	26.3672	37.11	130	133	92	20	100	9	352	10.4	15.6	0.666667	2.8	139	3.2	7.2	245	0.9	0	1	0	0	1	0	1	1	0	1	2	50	41	10	1	0	0	0	1	0	11.52	7.52	0	0
57	2	61.2	168	21.6837	37	99	159	111	26	95	7.3	195	14	13.7	1.0219	3.9	137	4.9	8.7	77	0.6	1	0	1	0	0	0	0	0	0	1	1	22	23	1	1	1	0	0	1	0	7.95	1.16	0	0
70	2	68.2	168	24.1638	36.44	121	92	60	23	99	12.5	155	10.3	17.1	0.602339	3.5	125	4.2	10.8	349	2.1	0	0	0	1	1	0	0	1	1	1	9	64	34	8	1	1	0	0	1	0	22.22	7.26	1	1
33	2	83.65	183	24.9784	37	124	84	59	22	95	9.9	301	11.8	17	0.694118	4	133	3.4	8.8	118	2.1	0	0	1	0	0	0	0	1	0	0	6	48	20	4	1	0	1	0	0	0	10.77	2.86	0	0
74	2	103.9	175	33.9265	36.39	66	106	57	16	98	6.6	79	7.5	16.9	0.443787	3.2	146	3.4	8.5	144	1.9	0	1	1	0	1	0	1	1	1	1	8	57	32	11	1	1	1	0	1	1	32.85	2.64	0	1
75	2	83.4	168	29.5493	36.89	45	116	64	22	98	4.7	57	10.2	17.3	0.589595	2.3	123	3.6	8.3	82	0.6	0	1	1	0	1	0	0	0	0	1	7	46	34	6	1	1	0	0	1	0	16.47	15.69	1	1
73	1	82.5	155	34.3392	36.78	70	85	46	22	91	17.6	149	9.3	15.3	0.607843	2.8	136	4	7.6	76	2.9	1	1	0	0	0	1	0	1	0	1	4	45	21	5	1	1	0	0	1	0	9.08	1.83	0	0
56	1	72	168	25.5102	36.72	80	103	65	12	100	3.7	227	8.9	17.3	0.514451	1.6	145	3.5	6.5	81	0.8	0	0	1	0	1	0	0	0	0	0	3	43	32	4	1	0	1	0	0	0	57.92	1.48	0	1
24	1	73.1	163	27.5133	37.44	97	105	54	30	100	36.8	91	6.8	14.6	0.465753	2.6	138	5.4	7.4	106	1	1	0	0	0	0	0	0	1	0	1	10	89	45	2	1	1	1	0	1	1	9.87	1.15	0	0
62	1	43.5	168	15.4124	36.39	85	102	69	22	97	18.1	293	9.3	14.1	0.659574	1.8	139	3.8	5.2	175	0.6	0	0	1	0	1	0	0	0	0	1	4	53	24	2	1	1	0	0	0	0	6.83	4.02	0	1
77	1	65	168	23.03	37.67	97	120	43	18	92	8.7	394	6.7	15	0.446667	3.3	133	4.3	7.2	104	6.7	0	1	1	0	1	0	0	0	0	1	8	65	34	5	1	0	1	0	1	0	15.65	2.9	0	0
71	1	63.166666666666664	168	22.3805	36.72	95	67	49	13	100	7.6	112	11.6	15.6	0.74359	2.8	135	4.6	8.4	166	1.5	0	0	0	0	1	1	0	1	0	1	5	43	22	4	1	1	0	0	0	0	10.27	1.24	0	0
35	2	88.5	188	25.0396	37.11	88	111	70	12	99	14.7	172	7.9	12.4	0.637097	2.8	136	5.6	7.5	93	0.6	1	0	0	0	0	0	0	0	0	1	5	23	30	0	1	1	1	0	1	1	4.61	2.19	0	0
79	1	48.5	150	21.5556	36.83	93	145	83	16	92	9.3	482	10.1	15.3	0.660131	4.1	138	4.5	10.2	120	1.1	0	0	0	0	1	1	0	1	0	1	5	33	28	5	1	0	0	0	1	0	14.94	5.82	0	0
68	1	77	163	28.9811	36.67	89	123	81	28	100	17.7	378	8.7	14.4	0.604167	3.1	136	4.6	10	136	0.9	0	1	0	0	1	1	0	0	0	1	7	45	44	8	1	1	1	0	0	1	11.65	11.79	1	1
57	2	75.7	157	30.7112	38.83	62	122	78	19	100	14.8	139	9.3	12.7	0.732283	2.3	135	5.5	8.3	184	0.7	0	0	0	0	1	1	0	0	0	1	3	29	30	1	1	1	1	0	0	1	48.83	46.99	0	0
71	1	161	168	57.0437	37.72	87	111	42	18	100	10	159	9.6	20.1	0.477612	2.8	140	5.3	8.9	334	2.9	1	1	1	0	1	0	0	1	0	1	4	61	26	7	1	0	0	0	1	0	24.84	1.96	0	0
67	2	82.5	178	26.0384	37.44	127	104	70	26	99	11	384	11.2	13.2	0.848485	3	136	4.5	8.4	126	1.4	0	1	0	0	1	1	1	1	1	1	3	61	33	6	1	1	1	0	1	0	17.38	3.62	0	0
71	1	74.2	165	27.2544	36.89	118	97	41	15	100	6.6	137	9	15.5	0.580645	3.6	136	4.9	9	121	4.1	0	1	0	0	0	0	1	1	0	1	6	33	35	9	1	1	0	0	1	1	22.65	3.4	0	0
62	2	130.6	168	46.2727	36.94	73	106	77	22	96	7.4	175	10.6	15.7	0.675159	2.8	138	5.8	9	135	1	0	0	0	1	0	1	1	0	0	1	0	22	26	3	1	1	0	0	0	0	3.36	1.29	0	0
58	2	75.3	175	24.5878	36.33	76	91	66	16	100	9.7	154	8.7	15.6	0.557692	2.8	137	4.2	8	142	3.4	0	0	0	0	1	0	1	0	0	1	3	36	30	5	0	0	1	0	0	1	38.7	1.79	0	0
79	2	79.69999999999999	175	26.0245	36.78	81	116	58	22	87	5.4	112	12.6	15.5	0.812903	2.8	140	3.7	8.5	177	1.1	0	0	1	0	0	0	0	0	0	1	6	34	29	5	0	0	1	0	1	0	4.64	3.58	1	1
49	2	87	173	29.0688	37.89	119	107	52	27	99	4.4	147	10.9	18.3	0.595628	3.5	134	3.9	8.5	89	1.6	0	0	0	0	1	0	0	1	0	1	9	46	35	11	0	1	1	0	1	1	19.93	15.12	0	0
64	1	52.05	168	18.4418	36.61	57	99	55	17	97	15.5	260	11.2	14.5	0.772414	2.8	135	3.3	9	97	0.6	1	0	0	0	0	1	0	0	0	0	0	25	23	3	0	1	0	0	1	0	4.02	3.14	0	0
60	1	147.8	168	52.3668	36.61	76	115	67	21	92	22.1	371	13.7	12.7	1.07874	3.3	122	7	8.5	326	3.8	1	1	0	0	1	0	1	1	1	1	4	57	25	8	0	1	0	0	1	0	3.75	1.83	1	1
68	1	99.8	157	40.4885	36.72	65	127	73	20	97	10.5	243	12.5	12.8	0.976562	2.8	145	4.5	9.5	176	0.5	0	0	0	0	1	1	1	0	0	1	2	35	30	6	0	0	0	0	1	0	13.66	9.75	0	0
42	1	84	168	29.7619	36.5	87	118	94	12	98	6.7	216	9	14.3	0.629371	2.8	138	3.6	8.7	362	0.4	0	0	0	0	1	0	1	0	0	0	2	37	22	5	0	0	1	0	0	0	6.98	1.82	0	0
40	2	89.5	183	26.7252	37	103	140	81	22	100	7	174	14.4	14.2	1.01408	2.8	141	4.4	8.5	104	1.6	0	0	0	0	1	0	0	0	0	1	9	73	39	1	0	1	0	0	0	1	29.89	25.06	0	0
59	1	60	168	21.2585	36.61	84	111	61	16	93	15.3	122	10.9	16.2	0.67284	2.8	140	4.8	10.8	223	1	0	0	0	0	1	1	1	0	1	0	1	26	17	3	0	1	0	0	1	0	70.74	1.31	0	0
27	2	55.9	170	19.3426	36.28	95	101	75	15	100	7.1	463	7.4	18.5	0.4	3	137	3.9	8.2	110	4.5	0	0	1	0	1	0	0	0	0	1	4	37	16	2	0	1	0	1	1	1	81.46	81.76	0	1
68	2	81.1	178	25.5965	36.83	108	94	62	19	97	29.4	284	8.2	13.8	0.594203	2.6	135	4.6	8.4	127	0.9	0	0	0	0	1	1	0	0	0	1	10	103	50	2	0	0	0	0	1	1	10.96	1.9	0	0
59	1	138.5	188	39.1863	36.89	122	153	80	30	88	7	237	13.4	17.3	0.774566	2.8	134	3.3	8.4	308	0.6	1	1	0	0	0	1	1	1	0	1	0	39	34	4	0	0	1	0	1	0	15.95	2.92	0	0
66	2	108.25	168	38.3539	36.67	96	101	63	25	100	10.1	130	7.1	17.5	0.405714	2.8	139	4.4	8	97	0.7	0	0	0	0	0	1	1	0	1	1	3	26	43	4	0	0	0	0	1	1	6.73	1.12	0	0
54	1	100.7	173	33.6463	36.44	129	98	65	25	100	6.3	522	13.8	15.7	0.878981	2.4	140	3.6	9.3	160	0.9	0	0	0	0	1	1	0	0	0	1	8	59	45	1	0	0	0	0	1	0	17.95	7.18	0	0
35	1	55.7	157	22.5973	37.11	101	164	91	25	98	13.9	323	9.3	14.9	0.624161	2.9	141	2.4	7.5	108	0.7	0	0	0	0	0	0	0	0	0	0	3	28	32	1	0	0	1	0	0	1	3.92	1.08	0	0
32	2	97.5	173	32.5771	36.83	111	107	51	20	93	15.6	6	11.8	14.2	0.830986	2.4	128	3.3	7.8	117	9.6	0	0	0	0	1	1	0	0	0	1	17	120	57	0	0	1	0	1	1	1	3.13	3.08	0	0
30	2	72.5	168	25.6874	36.94	87	126	96	20	94	10.3	120	12.7	12.9	0.984496	2.8	138	3.3	9	108	1.3	0	0	1	0	1	0	0	0	0	1	2	25	28	1	0	1	0	0	1	0	1.78	1.75	0	0
25	2	72.5	168	25.6874	37.06	90	156	90	22	98	8.6	187	12.6	14.1	0.893617	3.8	132	3.6	7.7	498	0.8	0	0	1	0	0	0	0	0	0	0	0	35	16	1	0	0	0	0	0	0	6.89	1.2	0	0
58	1	164	168	58.1066	38	80	105	43	20	99	11.1	321	8.8	14.3	0.615385	3.2	139	5.6	8.1	317	3	0	0	0	0	1	0	1	1	0	1	10	68	33	7	0	1	1	0	0	1	13.89	11.79	0	0
72	2	76.3	180	23.5494	36.39	78	107	62	6	100	8.6	126	8	12.6	0.634921	2.8	134	4.6	7.6	102	1	0	0	0	0	0	0	0	1	0	1	6	28	24	5	0	1	0	0	1	0	10.9	2.16	0	0
68	2	76.2	165	27.989	36.94	143	185	107	37	91	11.6	279	10.8	14.6	0.739726	3	142	4.2	8	211	1.3	0	0	0	0	1	1	1	1	0	1	7	62	40	10	0	1	1	0	1	1	22.43	4.4	0	0
58	2	111	178	35.0335	36.78	86	118	72	18	97	7.5	196	13.3	13.8	0.963768	2.8	146	3.9	8.8	102	1	0	0	0	0	0	1	0	0	0	1	1	17	19	2	0	1	0	0	1	0	10.51	5.25	0	0
71	2	108.3	175	35.3633	37.28	84	165	87	20	99	1.7	162	9.5	18.6	0.510753	3	139	3.4	8.6	233	1	0	1	0	0	1	0	0	1	0	1	0	33	34	4	0	0	1	1	1	1	112.86	48.82	0	0
66	1	83	168	29.4076	36.78	94	112	52	17	95	18.8	186	7.8	20.8	0.375	2.4	140	3.4	6.9	105	0.6	0	0	1	0	1	0	0	0	0	1	4	62	33	9	0	1	0	0	1	0	12.04	2.14	0	0
45	2	82.35	168	29.1773	35.83	74	94	63	15	100	7	277	7.9	19.6	0.403061	2.7	144	3.9	7.6	88	0.7	0	1	0	0	0	0	0	0	0	1	2	36	30	0	0	1	0	0	0	0	5.78	1.27	0	0
52	2	80	168	28.3447	37.22	32	108	44	16	97	10.8	243	14.4	13.8	1.04348	4.1	136	6.5	9.3	152	2.2	0	0	1	0	1	1	0	1	0	1	7	54	37	2	0	0	0	0	1	1	6.68	2.54	0	0
76	1	62.166666666666664	168	22.0262	36.67	110	103	49	21	92	23.4	310	11.1	11.8	0.940678	2.2	133	3.9	8.6	126	0.6	1	0	1	0	1	0	0	1	0	1	2	48	38	5	0	1	0	0	1	0	5.7	1.07	0	0
61	2	204	168	72.2789	36.56	81	163	97	17	87	6	222	13.7	18.1	0.756906	3.5	138	4.2	9	125	0.6	0	0	0	0	0	1	1	0	0	1	2	12	19	4	0	1	0	0	1	0	18.81	8.39	0	0
56	2	68	168	24.093	36.89	106	166	116	19	99	17	194	14.2	14.1	1.00709	4.2	140	4	8.9	103	0.9	0	0	0	0	0	1	1	0	0	0	1	41	32	2	0	0	0	0	1	0	2.93	1.1	0	0
77	2	61.15	183	18.2597	36.61	136	135	117	23	87	12.3	273	13.3	13.4	0.992537	2.8	139	3.8	7.6	96	0.7	1	0	1	0	0	1	0	0	0	1	2	32	43	5	0	0	0	0	1	1	8.17	2	0	0
66	2	89.4	178	28.2161	35.94	76	175	100	14	96	9.1	365	12.9	15.1	0.854305	3.9	139	4.5	8.3	125	0.8	0	0	1	0	0	1	0	0	0	1	0	36	33	2	0	1	0	0	0	0	6.63	2.87	0	0
66	1	122.35	168	43.3496	37.06	107	157	100	19	97	4.6	207	9.7	14.3	0.678322	2.8	143	4.4	9.2	126	1.3	1	0	0	0	0	0	0	0	0	1	1	25	27	4	0	1	0	0	0	0	10.13	1.31	0	0
62	1	115	160	44.9219	36.44	84	112	69	17	93	25	387	10.9	16.1	0.677019	2.8	144	4.2	8.5	116	1.4	0	0	1	0	0	0	0	0	0	1	2	27	16	7	0	0	1	0	0	0	4.75	2.04	0	0
69	1	75	165	27.5482	37.06	86	127	89	23	86	6.4	273	13.9	17.9	0.776536	2.8	141	3.7	9	81	1.4	0	0	0	0	1	1	0	0	0	1	2	38	24	3	0	1	0	0	1	0	9.81	9.82	0	1
36	1	56.2	170	19.4464	35.83	81	112	84	16	100	16.2	268	8.2	16.2	0.506173	2.8	139	4.7	7.8	87	0.9	0	0	0	0	0	1	0	0	0	0	1	25	44	0	0	0	1	0	1	1	53.48	1.12	0	0
79	1	97.2	168	34.4388	36.5	104	116	80	20	97	12.8	155	14.2	14.8	0.959459	3.5	137	5.1	9.3	187	1.3	0	1	0	0	0	1	1	0	0	1	4	37	42	5	0	0	0	0	1	0	3.88	2.29	0	0
62	2	38.5	168	13.6409	37.28	103	127	86	25	98	27.6	502	9.3	16.6	0.560241	2.6	144	3.8	9.7	91	0.6	0	0	1	0	0	0	0	1	0	0	7	39	29	5	0	0	1	0	1	0	4.13	2.01	0	1
70	2	74.8	168	26.5023	36.44	55	136	55	14	100	6.2	118	13.2	13	1.01538	2.8	141	3.8	8.1	104	0.8	0	0	0	0	0	0	0	0	0	0	3	38	22	3	0	1	0	0	1	0	8.74	1.75	0	0
30	2	96.5	168	34.1908	36.94	87	136	86	20	100	18.3	223	11.7	13	0.9	3.1	138	4.7	7.5	116	1.1	1	0	0	0	0	0	0	0	0	1	0	20	28	0	0	1	0	0	1	1	11.1	8.21	0	0
39	2	90	168	31.8878	36.22	96	154	81	16	98	14	100	14.6	14.6	1	3.8	145	4.2	9.8	94	1.8	0	0	0	0	1	1	0	0	0	1	12	52	33	4	0	1	1	0	1	0	102.44	5.64	0	0
59	2	102.2	168	36.2103	37.83	86	121	68	18	97	18.2	372	8.3	16	0.51875	2.8	135	3.5	8	133	0.7	0	0	1	0	0	0	0	0	0	1	0	15	26	2	0	0	0	0	0	0	4.19	1.37	0	0
70	1	82.19999999999999	155	34.2144	37.11	126	110	80	36	88	14.4	174	9.7	16.6	0.584337	2.8	131	5.6	8.6	111	1.1	0	1	0	0	0	0	0	1	0	1	2	44	34	5	0	1	1	0	1	0	10.71	4.58	0	0
75	2	85.1	168	30.1516	36.56	80	149	68	16	97	11.5	356	11.5	12.3	0.934959	3.2	136	4.2	8.3	112	0.6	0	0	0	0	0	1	0	0	0	1	1	27	19	4	0	1	0	0	1	0	4.87	1.98	0	0
60	2	120	168	42.517	36.83	81	115	61	36	92	5.4	74	10.3	20	0.515	2.5	127	5.2	8.5	109	2.4	1	0	1	0	1	1	0	0	0	1	8	69	33	5	0	0	1	0	0	0	12.68	1.95	0	0
65	1	158.7	165	58.292	36.72	99	91	43	25	95	10.4	106	14.9	17.2	0.866279	3.4	142	4.2	9.1	123	1	0	0	0	0	1	1	0	0	0	1	9	53	34	3	0	0	1	0	1	1	30.58	30.59	0	0
79	1	104.3	163	39.2563	36.28	80	90	62	18	98	11.5	105	8	13.2	0.606061	2.8	139	5.3	8.4	113	2	0	1	1	0	0	0	0	0	0	1	7	37	36	6	0	0	0	0	1	1	7.65	2.17	0	0
80	2	85.5	168	30.2934	37	87	155	91	29	94	6.3	126	14.6	15.1	0.966887	2.8	137	4.9	9.1	243	1.5	0	0	0	0	1	0	0	1	0	1	5	32	28	7	0	1	0	0	1	0	13.73	8.75	1	1
61	2	79.9	157	32.4151	37.06	95	129	95	30	94	17.5	264	15	13.8	1.08696	2.8	140	5.7	8.4	184	0.9	0	0	0	1	0	1	0	0	0	1	0	26	31	2	0	1	0	0	0	0	3.74	2.84	0	0
79	1	66	170	22.8374	37.06	103	120	56	16	100	9.4	240	12.9	13	0.992308	3.2	138	3.5	9.1	143	0.6	0	0	1	0	0	1	0	0	0	1	3	26	40	7	0	0	0	0	0	0	14.02	1.95	0	0
66	2	70	168	24.8016	36.44	120	99	68	16	100	21.7	105	10.6	13.3	0.796992	2.9	138	5.2	7.6	265	0.8	0	0	0	0	1	0	0	0	0	1	8	39	41	3	0	0	0	0	1	1	23.67	6.44	0	0
38	2	126.5	168	44.82	36.89	86	110	43	27	100	17.7	34	8.3	22.5	0.368889	3.4	140	5.3	8.7	105	3.6	0	0	0	0	1	0	0	0	0	1	13	107	38	3	0	0	0	1	1	0	26.12	12.8	1	1
61	1	72.25	161	27.8732	37.61	100	116	56	19	95	10.1	197	10	12.8	0.78125	2.8	139	3.3	7.9	146	0.5	0	0	0	0	1	1	0	0	0	1	4	25	28	2	0	1	0	0	1	0	7.42	1.28	0	0
24	2	82.2	168	29.1241	37.83	101	125	79	17	95	24.2	166	11.8	12.2	0.967213	2.8	136	4.3	8.7	118	1	0	0	0	0	0	0	0	0	0	0	0	28	23	0	0	1	0	0	1	0	8.6	1.54	0	0
50	2	75.6	168	26.7857	37.61	61	129	81	16	95	5.8	83	9.1	21	0.433333	2.8	135	4	8.6	262	1.1	0	0	0	0	0	1	0	0	0	1	4	37	27	1	0	0	1	0	1	0	13.94	2.88	0	0
75	1	50.8	168	17.9989	37.11	90	131	55	22	93	9.3	501	8.3	16.7	0.497006	2.3	135	3.5	8.3	80	0.9	1	1	0	0	0	0	0	0	0	1	1	56	24	3	0	0	1	0	0	0	13.85	2.52	0	0
72	2	60	168	21.2585	35.56	104	131	94	15	95	8.8	108	9.4	16.2	0.580247	2.7	140	4.2	7.8	119	1.9	0	0	0	0	1	0	0	0	0	1	5	69	42	6	0	0	0	0	1	1	97.89	4.22	0	0
71	2	81.95	180	25.2932	36.44	80	95	70	16	100	15.4	149	11.2	12.6	0.888889	2.8	137	3.3	8.7	136	0.8	0	1	0	0	0	1	1	0	0	1	5	33	24	4	0	0	0	0	1	0	4.29	1.29	0	0
51	1	116	163	43.6599	37.06	67	94	59	27	96	8.7	295	8.6	17.6	0.488636	2.6	139	3.8	7.9	137	0.5	0	0	1	0	1	0	1	0	0	1	5	43	38	3	0	1	0	0	1	1	46.69	20.74	0	0
52	2	109.3	180	33.7346	37	108	142	93	29	93	12.6	332	9.6	13.8	0.695652	3.2	147	3.6	7.8	169	0.6	0	0	0	0	1	0	0	0	0	1	3	39	30	1	0	1	0	0	1	0	13.36	3.45	0	0
56	1	70.3	168	24.9079	36.56	70	118	73	11	100	6.3	52	10	23.4	0.42735	2	132	5.1	7.1	125	0.9	0	0	0	0	1	0	0	1	0	1	6	44	23	6	0	1	0	0	1	0	22.93	1.07	1	1
52	2	93.5	183	27.9196	39.33	111	130	58	31	93	20.3	164	11.7	15.2	0.769737	2.9	136	3.7	7.9	115	1.3	1	0	0	0	1	0	1	1	0	1	14	112	54	8	0	1	0	0	1	1	0.94	1.04	1	1
47	1	54.1	163	20.3621	37.06	104	103	56	54	100	8.8	198	7.5	20.7	0.362319	2.1	140	3.2	8.5	86	0.9	0	0	0	0	1	0	0	0	0	1	5	54	39	8	0	0	1	1	1	1	3.61	3.59	1	1
61	1	113.4	163	42.6813	38.67	76	122	52	28	92	20.7	332	8.8	16.9	0.52071	3.1	133	4.9	7.5	94	2.6	0	0	1	0	1	0	0	1	1	1	10	63	35	5	0	0	0	0	1	1	11.92	11.87	0	0
58	2	86.6	165	31.809	36.44	84	119	72	15	99	16.4	236	11.7	13.4	0.873134	2.8	146	3.8	8.7	132	0.9	0	0	1	0	1	1	0	0	0	1	1	27	35	2	0	0	0	0	0	1	11.74	11.74	1	1
74	2	76.9	170	26.609	37.5	95	97	61	23	100	91.9	635	9.3	19.1	0.486911	2.4	144	3.4	8.1	97	1	0	1	1	0	1	0	0	1	1	1	7	50	35	6	0	1	1	0	1	1	7.99	3.69	0	0
58	2	104	180	32.0988	37.11	147	173	85	30	95	28.4	125	9.8	19.4	0.505155	3.6	140	5.3	8.5	384	2.4	1	0	1	0	1	0	1	0	0	1	13	76	47	5	0	0	1	0	1	1	48.22	18.71	0	0
24	2	51.2	168	18.1406	37.28	57	108	60	12	99	6.7	438	10.1	13	0.776923	3.9	141	4	9.2	75	0.6	0	0	0	0	0	0	0	0	0	0	1	18	12	1	0	0	1	0	0	0	22.1	3.36	0	0
64	2	97.5	168	34.5451	37.11	107	147	83	24	96	9.8	281	14.5	12.9	1.12403	3.9	143	4.4	8.9	110	1.2	0	0	1	0	0	1	0	0	0	1	2	34	24	2	0	0	0	0	1	0	2.72	1.9	0	0
70	2	94	168	33.305	37.17	91	133	67	21	88	16.8	982	8.8	14.3	0.615385	3.1	142	3.8	8.5	175	0.6	1	0	0	0	0	1	0	0	0	1	3	18	30	8	0	0	0	0	1	0	8.75	1.69	0	0
47	2	93.5	178	29.5102	35.83	110	95	69	13	96	18.4	262	11.3	13.6	0.830882	3	135	4.7	8	83	0.9	0	1	0	0	1	0	1	0	0	1	9	58	40	6	0	0	0	0	1	1	3.3	3.33	1	1
66	2	102.33333333333333	168	36.2576	39.39	86	134	73	24	100	4.7	226	13.4	13.5	0.992593	2.2	138	3	7.3	146	1.1	0	0	0	0	1	1	0	0	0	1	11	43	37	2	0	0	0	0	1	1	24.87	9.98	0	0
47	2	219.9	168	77.9124	36.67	96	88	67	18	97	12	100	10	11	0.909091	2.8	149	4.5	9.4	163	0.8	0	0	1	0	0	0	0	0	0	1	0	24	19	0	0	0	0	0	1	0	5.81	2.15	0	0
70	1	99.35	160	38.8086	36.72	69	114	94	16	79	9.1	125	9.9	15.4	0.642857	4	140	4.3	8.5	96	1	0	1	0	0	0	0	0	0	0	1	3	25	25	9	0	1	0	0	1	0	16.77	1.18	0	0
48	1	162.9	168	57.7168	35.89	99	123	78	19	91	12	231	12.3	17.2	0.715116	2.8	130	3.9	8.9	239	0.7	1	0	0	0	0	1	1	0	0	1	1	31	23	1	0	0	1	0	1	0	8.45	5.68	0	0
41	2	83.3	168	29.5139	37.33	57	129	82	13	94	8.7	154	14.6	14.3	1.02098	2.8	138	3.6	9	114	0.9	1	0	0	0	0	0	0	0	0	1	3	35	32	1	0	1	0	0	1	0	4.48	1.96	0	0
75	1	80.6	168	28.5573	36.56	66	115	74	13	95	2.3	108	8.1	13.2	0.613636	4.1	118	4.7	8.7	79	3.2	0	0	0	0	0	0	1	1	0	0	4	44	18	10	0	0	0	0	0	0	10.48	1.04	0	0
44	1	88.8	157	36.0258	36.72	95	126	84	13	100	12.5	194	11.1	13.2	0.840909	3	143	4.3	9.1	103	0.5	0	0	1	0	1	1	0	0	0	1	1	22	14	1	0	0	0	0	1	1	13.7	6.67	0	0
71	2	87.65	170	30.3287	NULL	83	103	49	13	82	14	120	8.6	13.6	0.632353	2.8	139	3.7	7.7	91	0.8	0	1	0	0	0	0	0	1	0	0	9	71	37	6	0	1	1	0	1	1	6.89	1.29	0	0
55	1	68.8	168	24.3764	37.06	89	110	74	18	99	3.4	150	8.3	21	0.395238	2.4	135	4.1	8	119	0.6	0	0	0	0	1	0	1	0	0	1	5	59	34	5	0	0	1	0	0	0	4.75	1.81	0	0
76	2	132.5	168	46.9459	37.11	114	154	85	21	93	9.1	159	13	14.5	0.896552	3.5	142	3.6	7.8	159	1.4	0	0	0	0	0	0	1	1	0	0	1	34	29	8	0	1	1	0	1	0	4.78	1.76	0	0
62	1	122.2	168	43.2965	37.44	65	111	63	17	100	9.7	203	10.2	16.1	0.63354	3.4	145	4.4	8.8	109	0.9	0	0	0	0	1	0	1	1	0	1	1	34	21	10	0	0	0	0	0	0	6.82	6.72	0	0
65	2	147	178	46.3957	37.61	100	126	65	0	100	5.9	224	6.1	16.8	0.363095	1.7	143	4.3	7.9	174	0.8	0	1	0	0	1	1	1	0	0	1	6	38	31	3	0	0	0	0	1	1	33.01	6.85	0	0
71	2	77.7	168	27.5298	36.11	71	121	76	23	100	12.2	123	12.2	18.9	0.645503	3.6	136	4.5	10.2	138	7.1	0	1	0	0	1	0	1	1	0	1	13	68	46	8	0	0	0	1	1	1	14.63	14.75	1	1
48	1	196	168	69.4444	37.06	81	94	52	19	88	9.6	237	13.5	18.2	0.741758	3.6	149	4.2	8.8	113	2.1	1	0	0	0	1	0	0	1	0	1	11	78	42	4	0	0	0	0	0	1	2.55	2.67	1	1
30	1	134.3	170	46.4706	36.39	67	135	94	20	100	6.9	176	10.2	15.6	0.653846	3.3	149	4.1	8.7	136	0.8	0	0	1	0	0	1	1	0	0	1	6	28	32	2	0	0	0	0	0	0	13.82	7.54	0	0
72	1	95.83333333333333	173	32.0202	36.56	144	152	123	36	95	10.4	350	8.8	16.1	0.546584	1.7	137	3.4	7	153	0.4	0	1	0	0	0	0	0	1	0	1	2	52	31	5	0	0	1	0	1	1	52.71	5.95	0	0
26	1	85.1	173	28.434	36.56	91	111	76	16	99	10.1	354	11.1	15.3	0.72549	3.4	140	4.1	8.6	89	0.7	0	0	0	0	0	0	0	0	0	1	1	24	25	0	0	1	0	0	1	0	4	2.17	0	0
64	2	63.6	168	22.534	36.83	94	106	60	16	100	6.5	120	5.7	17.6	0.323864	2.1	123	4.3	7.1	82	1.4	0	0	1	0	1	1	0	0	0	1	8	55	22	6	0	1	0	0	0	0	17.59	2.8	0	0
78	2	62	168	21.9671	36.78	111	139	64	25	98	7.2	276	10.5	13.8	0.76087	3.9	134	3.5	9.4	147	1	0	0	0	0	0	1	1	0	0	1	3	38	33	5	0	0	0	0	0	0	6.9	6.1	0	0
26	1	78.4	178	24.7444	36.72	101	131	88	18	99	13.7	374	10.7	18.6	0.575269	3.2	133	4.4	7.8	98	0.6	0	0	1	0	0	0	0	0	0	0	2	16	22	0	0	1	0	0	1	1	5.8	1.04	0	0
64	2	77.6	168	27.4943	38.06	155	116	63	25	84	17	196	8.7	19.8	0.439394	2	139	3.6	7.5	91	0.9	0	1	1	0	0	0	0	0	0	1	1	48	25	2	0	0	0	0	1	0	9.74	1.86	0	0
64	2	108	168	38.2653	37.28	91	95	61	21	98	9	448	10.5	16.7	0.628743	2.8	143	4.2	9	107	0.8	0	0	0	1	0	0	0	0	0	0	1	36	30	3	0	1	0	0	1	0	6.95	1.15	0	0
44	2	106	180	32.716	36.61	111	128	85	17	97	13.6	171	15.3	12.4	1.23387	2.8	142	4	9.4	128	1.1	0	0	0	0	0	0	0	0	0	1	1	22	19	0	0	0	0	0	1	0	1.68	1.66	0	0
61	2	78.05	163	29.3763	37.06	143	93	77	32	96	1.4	349	14.5	19.4	0.747423	2.2	156	3	7.7	181	2.3	1	1	0	0	1	0	0	1	0	1	11	80	45	3	0	1	0	0	0	0	19.75	6.75	0	0
59	2	69.4	168	24.589	37.33	137	137	97	23	99	17	278	9.8	14.8	0.662162	2.3	142	5.3	8.5	119	0.8	0	0	0	0	1	0	0	0	0	1	7	51	50	3	0	0	0	0	1	1	18.63	3.77	0	0
66	2	139	178	43.8707	36.94	68	177	70	25	100	15.8	166	14.9	12.8	1.16406	3	140	4.9	7.4	323	1.6	0	1	1	0	1	1	1	0	0	1	7	43	35	6	0	0	1	0	1	1	24.54	3.31	1	1
51	2	93	178	29.3524	36.44	84	142	65	29	99	14.9	62	9.5	15.2	0.625	2	134	4.5	7.1	147	8.6	0	0	0	0	1	0	0	1	1	1	15	109	40	4	0	0	0	0	0	1	1.05	1.27	1	1
68	1	68	168	24.093	36.11	126	116	66	25	100	12.3	311	9.6	13.3	0.721805	2.8	129	3.1	6.4	1016	0.7	0	0	0	0	0	1	0	0	0	0	0	38	24	3	0	1	0	0	1	0	6.62	1.65	0	0
43	2	54.5	168	19.3098	36.78	101	147	95	22	95	19.4	432	12.9	13.3	0.969925	2.2	134	4.2	8.4	127	0.7	1	0	0	0	1	0	0	0	0	1	0	63	22	8	0	1	0	0	1	1	26.95	26.97	1	1
73	2	98.16666666666667	180	30.2984	36.44	95	86	55	13	100	13.9	102	9	14.3	0.629371	2.8	143	5.6	7.5	219	1.2	1	0	1	0	1	0	0	0	0	1	7	36	40	4	0	1	0	0	1	1	10.87	4.97	0	0
60	1	55.1	168	19.5224	36.83	92	109	76	23	99	7.5	109	8.7	13.4	0.649254	3.8	138	4.1	9.1	103	0.8	0	0	0	1	0	0	0	0	0	0	2	24	19	3	0	0	0	0	1	0	12.71	1.21	0	0
31	2	86.6	168	30.6831	36.56	57	118	67	18	99	9.5	189	13.7	13.5	1.01481	4.2	142	4.1	8.8	219	0.8	0	0	0	0	0	0	0	0	0	1	1	23	25	3	0	0	0	0	1	0	4.06	3.01	0	0
24	1	63.300000000000004	173	21.1501	35.11	86	113	66	17	97	4.9	152	13.8	18.7	0.737968	3.3	144	3.4	10.1	123	0.6	1	0	0	0	1	0	0	0	0	1	8	34	32	0	0	1	0	0	1	0	30.74	3.53	0	0
55	2	121.9	183	36.4	37.67	84	123	67	26	98	7.6	166	10.1	15	0.673333	3.2	136	3.8	7.9	108	0.6	0	0	1	0	0	0	0	0	0	1	1	23	19	2	0	0	1	0	1	0	18.15	1.32	0	0
62	2	58.6	168	20.7625	36.67	122	154	98	27	94	7.1	142	10.3	12.2	0.844262	3.5	135	3.9	8.7	144	0.7	1	0	0	0	1	1	0	0	0	0	2	36	29	2	0	0	0	0	1	0	22.14	1.47	0	0
66	2	76.8	168	27.2109	36.89	88	124	94	13	99	5.2	101	11.8	12.2	0.967213	2.8	140	3.1	7.9	113	1	0	0	0	0	0	0	0	0	0	0	3	22	21	2	0	1	0	0	0	0	9.94	1.18	0	0
79	1	61	168	21.6128	37.22	95	125	80	22	98	4.8	216	8.6	14.5	0.593103	2.3	135	3.3	7.9	92	0.6	0	0	0	0	0	1	0	0	0	0	7	54	35	5	0	0	0	0	0	0	38.75	1.93	0	0
49	1	74.5	178	23.5134	36.11	77	121	44	16	98	1.1	74	9.7	13.6	0.713235	2.8	137	3.2	8.5	124	0.5	0	0	0	0	0	0	0	0	0	1	6	36	23	4	0	1	0	0	1	0	5.71	1.24	0	0
44	1	84.85	168	30.0631	36.89	80	143	101	18	96	8.7	328	9.7	18.5	0.524324	2.9	145	3.6	9	74	0.8	0	0	0	0	1	1	0	0	0	0	4	46	34	1	0	0	0	0	1	1	6.8	3.61	0	0
33	1	53	152	22.9398	36.39	87	105	68	18	100	7	155	8.6	14.6	0.589041	3.9	144	3.4	8.5	97	0.9	0	0	1	0	1	0	0	0	0	1	4	14	27	2	0	1	1	0	0	1	8.91	3.89	0	0
73	2	89.6	168	31.746	36.72	57	171	96	11	97	6.1	216	14.5	12.8	1.13281	4.1	137	3.9	9.1	102	0.7	0	0	0	0	0	1	0	0	0	1	1	15	20	4	0	0	0	0	1	0	1.71	1.79	0	0
39	1	62.3	168	22.0734	36.61	138	91	63	24	98	30.3	685	5.9	15.5	0.380645	1.7	134	3.9	7.6	119	0.6	1	0	1	0	1	0	0	0	0	1	4	54	32	0	0	1	0	0	1	0	58.94	2.44	0	0
35	2	85.2	168	30.1871	37.06	103	111	78	21	98	7.7	366	11.3	14.1	0.801418	3	143	4.4	8.9	90	0.6	0	0	0	0	0	0	0	0	0	0	0	20	24	1	0	1	0	0	0	0	7.04	2.19	0	0
55	2	74.95	165	27.5298	36.83	129	98	65	18	100	9	138	9.9	14.6	0.678082	2.8	149	5.2	9.3	116	0.9	0	1	1	0	1	1	0	0	0	1	2	37	36	2	0	1	1	0	0	1	3.61	3.8	1	1
73	2	119	165	43.7098	37.22	54	115	61	24	100	9.2	219	13.4	13.1	1.0229	3.7	149	3.9	9	144	1.2	0	1	0	0	1	0	0	1	0	1	2	35	28	5	0	0	0	0	1	1	52.65	38.02	0	0
71	2	60.4	165	22.1855	36.33	79	175	90	24	100	20.7	396	9.3	18	0.516667	3.1	137	3.8	8.4	245	1.3	0	0	0	0	1	0	1	1	0	1	4	52	41	12	0	0	0	0	1	1	17.81	2	0	0
63	2	97.6	168	34.5805	37	61	106	76	29	97	17.7	192	9.5	12.3	0.772358	2.8	141	3.6	8.5	142	1.7	0	0	1	0	0	1	1	0	0	1	1	43	32	4	0	0	1	0	1	0	17.45	2.45	0	0
61	2	75.3	175	24.5878	36.67	73	154	90	22	93	11.3	345	13	14.1	0.921986	3.2	137	3.7	9	207	1	0	0	0	0	1	0	1	0	0	1	3	44	36	7	0	1	1	0	1	1	26.64	20.97	0	1
75	1	65.63333333333333	163	24.703	36.39	49	95	37	14	100	7.7	320	9.2	15.9	0.578616	2.8	139	3.7	8.4	75	0.9	0	0	0	0	0	0	0	1	0	0	1	34	22	5	0	0	0	0	1	1	3.88	2.09	0	0
73	2	120	185	35.0621	35.17	89	125	84	17	93	10.9	224	8.5	14.8	0.574324	2.8	141	4.1	9.6	107	1.8	0	1	0	0	0	0	0	1	1	1	2	52	32	7	0	0	0	0	1	1	7.16	3.15	0	0
44	2	193.2	191	52.9591	36.89	118	111	71	18	91	17.1	236	14.1	14	1.00714	3.6	139	4.2	8.6	157	0.6	0	0	0	1	0	0	0	0	0	1	1	26	30	0	0	0	1	0	1	0	5.15	1.19	0	0
64	2	89	168	31.5334	37.67	73	128	76	19	100	7.3	315	11.2	13.7	0.817518	3.4	135	3.8	8.9	108	0.9	0	1	0	0	1	0	0	0	0	0	2	30	21	6	0	0	1	0	0	0	32.75	6.33	0	0
55	1	77.4	168	27.4235	37.44	84	94	52	42	98	13	427	9.8	19.2	0.510417	2.8	135	3.8	7.9	131	0.3	1	0	0	0	0	0	0	0	0	0	1	37	29	2	0	0	0	0	1	0	2.69	1.24	0	0
66	2	138.3	183	41.2971	37.06	125	130	83	22	91	9.5	220	13.6	15.8	0.860759	2.7	147	3.7	8.8	101	1.2	1	1	0	0	1	0	0	1	0	1	5	49	40	5	0	0	0	0	1	1	21.93	9.19	0	0
65	1	47	168	16.6525	36.89	86	107	70	19	98	7.3	81	11.3	19.6	0.576531	2.8	139	4	9.4	132	2.5	1	0	0	0	0	0	0	1	0	0	8	36	16	9	0	0	1	0	1	0	23.31	2.34	0	0
64	1	58	168	20.5499	36.67	83	120	67	10	96	12.9	259	10.5	13.3	0.789474	3.5	143	3.7	8.5	161	0.7	1	0	0	0	0	1	0	0	0	0	2	24	27	8	0	1	0	0	0	1	16.43	2.89	0	0
74	1	57.5	152	24.8875	36.44	94	158	71	20	93	14.8	348	14	14.2	0.985915	3.9	139	4	8.4	134	0.7	0	1	0	0	1	1	0	1	0	1	1	43	42	9	0	0	1	0	1	1	14.81	4.89	0	0
74	1	72.3	168	25.6165	36.94	119	103	79	25	99	17.9	126	10.7	18.2	0.587912	3.4	126	4.5	9	172	2	0	1	0	0	0	0	0	1	0	1	6	55	33	4	0	0	0	0	0	0	8.33	2.11	0	0
73	2	77.5	178	24.4603	37.67	119	102	47	25	100	1.9	121	5	19.7	0.253807	2.3	133	3.7	7.2	129	0.9	1	0	0	0	0	0	0	0	0	0	4	57	21	4	0	1	0	0	0	0	17.85	2.06	0	0
70	2	85.1	165	31.258	35.56	97	132	70	14	99	5.3	113	11.6	16.3	0.711656	2.8	140	3.9	8.7	140	0.5	0	0	0	0	0	1	1	1	0	1	2	28	28	5	0	0	1	0	1	0	11.36	3.39	0	0
69	2	48.4	178	15.2758	36.11	109	106	55	22	100	28	516	8.2	14.7	0.557823	2.3	135	4.5	8.1	314	1.9	0	0	0	0	1	0	1	0	0	1	8	58	37	6	0	1	0	0	1	1	15.61	3.94	1	1
72	1	95.4	157	38.7034	38.17	107	103	63	28	98	12.7	160	11.2	15.4	0.727273	3.4	135	3.4	9.7	116	2.5	0	0	0	0	1	0	1	1	0	1	9	56	40	10	0	0	0	0	1	1	14.63	2.66	0	0
77	1	79.4	168	28.1321	36.89	87	134	84	17	100	19.4	382	8.1	13.8	0.586957	2.8	132	3.9	6.9	100	1.7	1	0	0	0	1	1	0	1	0	1	3	35	27	5	0	1	0	0	1	0	11.08	2.55	0	0
65	1	46.4	152	20.0831	37.33	82	93	59	27	82	5.7	198	13.8	14.7	0.938776	2.2	122	5.9	6.9	133	3.8	0	1	0	0	1	1	0	0	0	1	11	113	52	4	0	1	0	1	1	1	23.78	21.79	1	1
69	2	89	168	31.5334	36.72	82	140	70	22	97	16.9	666	14.4	13.8	1.04348	4	143	4.6	9	135	1	0	0	1	0	0	0	1	0	0	1	2	26	22	4	0	0	0	0	1	0	5.06	2	0	0
53	2	70.83333333333333	168	25.0968	37.89	102	118	78	26	95	13.2	205	8.9	22.9	0.388646	2.8	136	4.4	8.4	126	0.7	0	0	1	0	1	0	0	0	0	0	2	28	27	2	0	1	0	0	0	0	6.2	1.25	0	0
46	1	65	152	28.1337	36.89	124	115	86	22	98	18.2	219	16.1	13.9	1.15827	2.8	139	3.5	8.3	170	0.9	1	0	0	0	0	0	0	1	1	1	9	47	42	3	0	0	0	0	1	1	6.17	3.29	0	0
19	2	66.1	168	23.4198	36.83	106	111	84	22	98	9.6	280	12	12.3	0.97561	4.4	135	3.9	9.1	86	0.8	0	0	0	0	0	0	0	0	0	0	2	27	15	0	0	1	0	0	0	0	6.65	3.33	0	0
59	1	94	165	34.5271	34.17	85	98	69	13	97	3.7	143	9.6	19.9	0.482412	2.8	133	4.5	8.9	108	2.1	0	1	0	0	1	0	0	1	0	1	5	60	33	5	0	0	0	0	1	0	8.67	4.65	0	0
64	2	49.8	168	17.6446	37	83	96	69	6	95	2.9	55	13.6	19.9	0.683417	2.8	129	4.6	7.1	134	1.1	0	0	0	0	1	0	0	0	0	1	8	75	32	6	0	0	0	0	0	0	2.05	1.75	1	1
48	2	125	168	44.2885	36.67	120	129	79	30	90	7.2	195	15.8	13.8	1.14493	2.8	139	3.6	9.4	139	1.2	0	0	0	0	0	1	0	0	0	0	3	35	18	0	0	0	1	0	1	0	5.6	2.13	0	0
60	2	93.60000000000001	168	33.1633	37.11	118	155	117	15	96	5.9	193	11.5	17.6	0.653409	2.8	134	3.7	8.5	216	0.8	1	0	0	0	0	1	0	0	0	0	1	41	27	1	0	0	0	0	1	0	2.88	1.11	0	0
77	2	86	168	30.4705	36.83	80	136	81	21	92	3.4	67	11.9	14	0.85	2.7	132	3.9	6.4	111	0.4	0	0	0	0	1	0	1	0	0	1	5	56	28	10	0	1	0	0	1	0	12.93	5.05	0	0
27	1	87	170	30.1038	36.78	55	125	70	18	99	12.1	100	10.6	11.8	0.898305	2.8	140	4.1	8.5	102	0.6	0	0	0	0	1	1	0	0	0	1	7	66	39	3	0	0	0	0	1	1	15.56	15.54	0	0
51	2	155	168	54.9178	36.67	86	142	80	19	98	9.1	279	11.1	20.1	0.552239	2.8	132	5	11.1	175	3.4	1	0	0	0	1	1	0	1	0	0	7	45	38	2	0	1	0	0	1	1	4.04	1.11	0	0
43	2	79.4	185	23.1994	36.89	97	117	70	27	97	25.5	155	9.2	14.4	0.638889	2.8	132	4.1	7.3	79	3.8	1	0	0	0	1	0	0	0	0	0	9	57	26	1	0	0	1	0	0	0	2.11	1.45	0	0
76	2	78.4	180	24.1975	39.39	105	120	57	14	93	9.2	339	10.9	13.4	0.813433	3.1	136	4.1	8.2	114	0.9	0	0	0	0	1	0	0	0	0	1	7	38	33	10	0	0	0	0	1	0	12.1	4.8	1	1
51	2	102.33333333333333	180	31.5844	37.17	104	118	78	19	95	13.6	225	14.4	14	1.02857	2.8	143	4.3	8.9	137	0.9	0	1	0	0	1	1	0	0	0	1	4	22	33	4	0	0	1	0	1	1	35.58	34.54	0	0
42	1	105.25	155	43.8085	37.39	122	159	102	24	97	14.8	224	9.1	17.2	0.52907	2.8	135	4.1	8.7	119	0.5	0	0	0	0	0	1	0	1	0	1	1	35	21	1	0	0	0	0	0	0	1.85	1.84	0	0
39	2	82	168	29.0533	37.06	120	119	72	10	97	10.1	201	10.4	13.3	0.781955	2.8	136	4.3	7.9	179	0.4	0	0	1	0	0	1	1	0	0	0	0	27	19	1	0	0	0	0	1	0	12.77	1.72	0	0
68	1	51.95	168	18.4063	36.56	114	84	44	14	98	8.8	321	7.2	16.2	0.444444	3.2	137	4	7	139	0.7	0	0	1	0	0	0	0	0	0	0	1	35	25	4	0	0	0	0	1	0	15.1	3.03	0	0
60	2	106.5	188	30.1324	39.28	103	103	59	15	91	7.9	171	15.6	13.9	1.1223	3.1	133	4.3	9.5	117	2.1	0	1	0	0	1	1	1	0	0	1	4	47	39	6	0	1	0	0	1	1	22.33	3.15	0	0
56	2	89.8	170	31.0727	36.83	67	145	83	22	95	15.6	201	13.2	12.7	1.03937	2.2	143	4.4	8.3	152	1.1	1	1	0	0	1	0	1	0	1	1	3	36	21	9	0	1	0	0	1	1	55.23	21.05	0	0
57	2	56.8	170	19.654	37.39	97	107	64	16	98	10.8	226	11.1	13.2	0.840909	2.8	141	3.9	8.6	101	0.8	0	0	0	0	0	0	0	0	0	0	1	22	22	3	0	0	1	0	0	0	2.07	1.21	0	0
62	1	72.8	157	29.5347	36.94	118	123	60	21	93	14	778	7.9	19.8	0.39899	2.7	134	3.9	9.3	115	0.6	0	0	0	0	0	0	0	0	0	1	1	38	31	5	0	0	0	0	1	0	16	3.68	0	0
38	2	114.7	183	34.2501	39.11	130	85	54	14	98	9.8	154	12.3	13.2	0.931818	2.2	137	4.2	7.7	105	1.5	1	1	0	0	1	1	0	0	0	1	7	84	44	1	0	1	0	0	1	1	20.81	15.93	0	0
67	1	84.75	168	30.0276	37.61	98	124	57	24	100	16.6	175	7.9	15	0.526667	2.8	137	4.5	7.7	178	1.4	0	0	0	0	1	1	0	0	0	1	3	51	38	2	0	0	0	0	1	0	9.87	3.55	0	0
64	2	105.6	188	29.8778	35.78	69	130	104	14	98	5.2	117	11.3	13.3	0.849624	3	143	4.1	7.1	107	0.8	0	0	0	0	1	1	0	1	0	1	11	48	43	3	0	0	0	0	1	1	10.93	10.04	0	0
42	2	105.55	183	31.5178	36.56	58	137	67	26	98	12.5	114	7.2	14.6	0.493151	2.4	133	4.4	8.1	99	1.2	1	1	0	0	1	0	0	1	0	1	9	56	27	1	0	0	0	0	1	1	26.61	7.33	0	0
72	2	72.2	178	22.7875	36.39	73	136	56	16	100	6.4	201	13.4	12.9	1.03876	4.2	133	3.9	9.3	105	0.7	0	0	1	0	0	0	0	0	0	1	5	40	38	4	0	1	1	0	0	0	49.08	8.92	0	0
44	1	67.9	168	24.0575	37.06	131	118	73	22	94	11.9	228	10	12.6	0.793651	2.8	135	3.9	9.2	126	0.7	0	0	0	1	0	0	0	0	0	1	1	32	29	0	0	0	0	0	1	0	6.99	3.92	0	0
78	2	66	168	23.3844	36.83	86	140	78	16	93	4.1	139	11	19.3	0.569948	2.6	130	5.3	8.3	83	1	0	0	0	0	0	0	0	1	0	1	4	31	28	13	0	0	1	0	1	0	71.68	2.94	0	0
68	1	111.6	152	48.3033	37.33	113	84	51	42	95	9.8	270	8.5	17.9	0.47486	2.4	129	4.8	8.2	140	1.3	0	1	0	0	1	1	0	0	0	1	12	65	46	6	0	0	0	0	1	1	28.86	9.68	0	0
48	1	62.6	168	22.1797	36.56	93	182	88	18	100	9.9	278	11.6	15.2	0.763158	3.7	136	4.3	9.2	164	1.4	1	1	0	0	1	0	1	0	0	1	7	62	37	4	0	0	0	0	1	0	34.69	8.8	0	0
71	1	90.1	168	31.9232	36.61	106	158	112	20	94	22.8	256	13.6	13.1	1.03817	2.8	134	3.4	8.1	140	1.7	0	1	1	0	0	1	0	0	0	1	1	37	27	3	0	0	1	0	1	0	9.52	1.54	0	0
64	1	81.4	168	28.8407	36.39	89	127	85	17	100	0.9	10	7.6	14.8	0.513514	2.8	135	6.3	9.3	68	3.6	0	0	0	0	1	0	1	0	0	1	9	82	35	7	0	0	0	1	0	0	57.97	1.54	0	1
44	1	106.8	170	36.955	34	109	115	66	16	100	13	210	10.5	20.8	0.504808	2.8	140	4.4	7.7	184	1.7	0	0	0	0	0	0	0	0	0	1	7	54	34	0	0	0	1	0	0	1	1.51	1.77	1	1
77	1	65.95	168	23.3666	36.5	99	141	66	31	100	28.5	291	7.8	15.9	0.490566	1.9	138	4.7	7	129	0.6	0	1	0	0	1	1	1	0	0	1	5	65	43	6	0	0	0	1	1	1	56.27	55.77	0	0
57	1	134.7	178	42.5136	36.61	83	115	57	5	100	10.5	259	8	16.8	0.47619	3.1	126	5.6	7.3	118	0.9	0	0	0	0	0	0	1	0	0	1	3	47	47	2	0	1	0	0	1	1	4.36	3.81	0	0
75	1	68.1	163	25.6314	37.22	98	110	53	32	97	14.4	352	5.5	16.5	0.333333	2	147	3.8	7.6	92	0.5	1	0	0	0	0	1	0	0	0	1	4	46	34	5	0	1	0	0	1	0	7.65	1.6	0	0
26	1	93.8	168	33.2341	36.72	82	110	93	17	97	4.3	243	11.9	13.2	0.901515	2.8	140	3.9	8.6	76	0.6	0	0	0	0	0	0	0	0	0	1	0	21	26	0	0	1	0	0	0	0	10.27	2.23	0	0
69	1	68.4	168	24.2347	36.44	116	95	67	21	95	6.6	95	8.5	17.4	0.488506	2.2	134	4.5	6.8	112	0.5	0	1	0	0	0	1	0	0	0	1	6	39	33	4	0	0	0	0	1	0	6.37	3.46	0	0
61	2	53.9	168	19.0972	35.56	66	85	62	18	96	21.7	560	8.2	14	0.585714	1.9	140	3.8	6.7	126	0.6	1	0	0	0	0	0	0	0	0	0	2	60	23	8	0	0	0	0	1	1	31.04	3.86	0	0
59	2	109	168	38.6196	39.39	137	157	74	31	96	11.2	159	7.7	14.5	0.531034	2.8	136	3.5	7.8	122	1	0	0	0	0	0	0	0	0	0	1	1	29	28	1	0	1	1	0	1	0	15.65	1.84	0	0
70	1	122.8	168	43.5091	36.56	119	114	78	17	96	12.4	219	11.6	13.7	0.846715	2.8	138	3.9	8.5	120	1	0	0	0	0	0	1	0	0	0	1	1	43	32	3	0	0	0	0	1	0	6.81	3.84	0	0
63	2	81.7	183	24.3961	36.72	94	106	63	23	91	9.7	289	9.2	16.5	0.557576	2.7	134	4.2	7.9	104	1.2	0	1	0	0	1	0	0	1	0	1	6	48	30	4	0	1	0	0	1	0	8.38	5.35	0	0
44	2	71.9	180	22.1914	39.44	127	123	87	22	100	9.5	282	9.5	14.6	0.650685	3.3	138	3.9	8	122	0.4	0	0	0	0	1	0	0	0	0	1	3	32	36	1	0	0	0	0	1	1	48.63	26.86	0	0
66	2	93.7	168	33.1987	37.17	96	146	64	24	99	25.1	301	13.9	14.2	0.978873	2.8	140	4.5	8.7	257	1	0	0	0	0	1	1	1	0	0	1	5	60	29	4	0	0	0	0	1	0	14.99	1.06	1	1
79	2	84.6	168	29.9745	36.56	77	116	74	15	100	7	262	8.3	15	0.553333	2.8	137	3.6	8.8	117	1.3	0	1	0	0	1	0	0	0	0	1	2	29	23	4	0	1	0	0	1	0	3.88	2.61	0	0
67	2	109	168	38.6196	37	84	89	59	23	100	46.1	107	9.1	15.5	0.587097	2.3	140	5.4	7.8	136	1	0	1	0	0	1	1	0	1	1	1	6	35	34	8	0	1	1	1	1	1	18.75	17.9	1	1
73	2	89.55	185	26.1651	36.67	79	111	60	23	100	2.1	100	9.4	14.2	0.661972	2.8	140	4.7	8.6	137	1.3	0	1	0	0	1	0	1	1	0	1	11	72	35	10	0	0	0	0	1	1	18.41	11.08	0	0
60	1	30.7	168	10.8773	36.78	61	96	68	12	99	10.1	104	8.4	15	0.56	2.8	132	6.1	7	144	1.8	1	0	0	1	1	0	0	0	0	1	7	42	19	3	0	1	0	0	1	0	10.96	2.22	0	0
61	2	70.5	184	20.8235	36.44	65	114	60	18	93	9.6	230	9	19	0.473684	2.8	136	3.9	9.4	127	1.4	1	1	0	0	0	0	0	1	0	0	4	40	24	5	0	1	1	0	1	0	27.06	1.37	0	0
58	2	84.1	168	29.7973	36.94	106	83	59	24	94	13.9	264	11	15	0.733333	3.5	132	6.9	10.3	116	9.6	0	0	1	1	0	0	0	0	0	1	7	66	32	6	0	1	1	0	1	0	60.13	3.78	0	0
24	1	74.95	168	26.5554	36.44	104	104	71	19	98	30.3	325	11.4	15.6	0.730769	3.2	134	4.5	7.7	112	1.5	0	0	0	0	0	0	0	1	0	1	6	60	33	2	0	1	0	0	1	0	15.28	15.29	1	1
29	2	79.7	165	29.2746	36.56	121	140	79	18	99	16.2	101	11.6	14.1	0.822695	2.8	140	4	7.9	170	1	0	0	0	0	1	0	0	0	0	1	6	77	44	0	0	0	1	0	1	1	27.66	4.68	0	0
65	2	104	168	36.8481	37.11	118	148	71	18	100	20.9	282	11.9	14.2	0.838028	3.6	138	3.2	8.7	161	1.3	0	0	0	0	0	1	0	1	0	1	2	46	23	3	0	0	0	0	0	0	9.97	3.82	0	0
75	1	75	168	26.5731	36.61	102	92	66	16	100	4.2	135	7.2	18.3	0.393443	1.5	126	3.8	7.9	142	0.6	0	0	0	0	0	1	0	0	0	1	2	44	33	7	0	1	1	0	0	1	2.14	2.29	1	1
37	1	84.9	170	29.3772	36.83	75	92	67	11	95	6.6	181	10.1	13.3	0.759398	2.8	137	5.5	8.6	150	1	1	0	1	0	0	0	0	0	0	0	8	16	24	2	0	0	0	0	1	1	16.93	1.99	0	0
29	1	74.5	170	25.7785	36.67	57	84	53	19	100	9.3	270	11	14.8	0.743243	2.8	143	4.2	8.9	77	0.6	0	1	0	0	0	1	0	0	0	0	1	22	28	1	0	0	0	0	1	1	5.57	1.41	0	0
65	2	89	168	31.5334	35.94	126	143	117	30	97	6.7	229	15.2	14.3	1.06294	2.5	136	4.1	7.7	149	1	0	1	0	0	0	1	0	0	0	0	1	38	28	2	0	0	0	0	1	0	8.19	1.13	0	0
38	2	96.6	189	27.0429	36.28	97	119	74	22	100	25.8	132	7.7	20.7	0.371981	2.5	135	3.5	7.2	140	5.1	0	0	0	0	1	0	0	0	0	1	19	133	48	1	0	0	0	0	1	1	17.25	8.75	0	0
80	2	113.1	168	40.0723	36.78	91	162	99	22	96	13.5	228	14.1	14.6	0.965753	4.3	142	4.3	8.8	158	0.8	0	1	0	0	0	1	0	1	0	1	0	21	23	5	0	1	1	0	1	0	6.56	1.49	0	0
61	2	92.2	173	30.8062	37.17	107	92	58	24	95	24.8	250	8.5	17.7	0.480226	1.8	143	4	7.3	180	3.3	1	0	1	0	1	0	0	0	0	1	6	89	45	5	0	1	0	1	0	1	8.19	2.92	1	1
77	1	63.8	168	22.6049	36.94	142	119	51	25	95	9.3	399	8.8	17.6	0.5	2.8	139	3.1	7.8	104	0.3	0	0	0	0	1	0	0	0	0	1	2	50	39	4	0	0	0	0	1	0	1.64	1.6	0	0
55	1	96.25	160	37.5977	37.56	80	105	46	16	100	12	100	10	11	0.909091	2.7	135	4	6.6	114	0.2	0	0	0	0	1	1	0	0	0	1	6	64	33	2	0	0	0	0	1	0	9.32	2.84	0	0
53	1	56.3	160	21.9922	36.5	79	85	57	19	98	6.4	105	7.1	26	0.273077	4.1	128	3.3	10.1	179	0.3	0	0	1	1	1	0	1	1	0	1	8	49	18	9	0	0	0	0	0	0	29.06	9.18	0	1
62	2	106.2	178	33.5185	36.89	77	110	76	17	98	13.9	270	13.6	12.7	1.07087	2.7	142	3.8	7.7	97	0.5	0	0	0	0	1	0	0	0	0	1	1	11	32	2	0	0	0	0	1	1	13.89	2.99	0	0
70	1	93.1	152	40.2961	36.44	108	120	70	34	97	5.5	76	11.2	13.4	0.835821	2.3	144	4.6	8.7	69	1	0	0	0	0	1	1	0	0	0	1	6	61	36	6	0	1	0	0	1	1	145.03	20.56	0	0
64	1	111.5	168	39.5054	36.67	76	119	80	13	91	4.5	203	10.5	14.8	0.709459	3.7	149	3.8	8.8	130	0.7	0	0	1	0	0	1	0	0	0	1	0	30	28	2	0	0	1	0	1	0	6.71	1.99	0	0
74	2	78.55	173	26.2454	36.5	80	142	60	11	100	12.1	170	9	12.6	0.714286	2.8	142	5.1	9	156	1	0	0	0	0	0	1	1	0	0	1	8	79	44	5	0	1	1	0	1	1	8.85	3.07	0	0
31	2	80	173	26.7299	37.17	76	NULL	NULL	14	100	16.6	237	7.1	12.6	0.563492	2.8	135	4.5	7.8	121	0.8	1	0	0	0	0	0	0	0	0	0	9	69	45	3	0	0	1	0	0	1	21.54	1.11	0	0
62	2	83.85	168	29.7088	36.89	108	99	85	21	87	11.9	209	11.8	19	0.621053	3.2	138	3.8	7.6	159	0.8	1	0	0	0	0	1	1	1	0	0	8	32	39	4	0	1	0	0	1	1	2.01	1.37	0	1
60	2	62.1	168	22.0026	36.94	79	148	42	37	100	3	40	8.4	15.1	0.556291	3.3	132	5.9	8.3	205	5.3	0	0	0	0	0	0	1	0	0	1	11	74	40	10	0	1	0	0	1	0	12.12	12.09	0	0
62	2	117	188	33.1032	36.11	102	152	85	20	96	49.1	446	10.4	13.9	0.748201	2.8	140	5.3	8.3	180	1	0	0	0	0	1	0	0	0	0	1	2	67	33	3	0	1	0	0	1	0	8.86	3.97	0	0
75	2	106.43333333333334	168	37.7102	37.61	82	103	79	11	98	12	258	10	17.4	0.574713	2.8	141	4.2	8.4	200	2.7	0	0	0	0	1	0	1	1	0	0	6	71	30	7	0	0	0	0	1	0	6.68	1.69	0	1
60	2	118.7	183	35.4445	37.44	88	96	57	24	94	22.2	259	8.4	15.9	0.528302	2.8	133	5.9	7.6	119	1.2	0	0	1	0	1	0	0	0	0	1	4	76	33	8	0	0	0	0	1	0	7.38	3.74	0	0
61	1	123	168	43.5799	36.67	71	139	65	20	93	11.5	255	11.7	14.5	0.806897	2.8	139	4.1	8.9	152	0.8	0	0	1	0	0	1	0	0	0	1	1	31	17	3	0	0	0	0	1	0	9.79	1.91	0	0
34	1	103	168	36.4938	36.56	115	122	66	11	100	13	296	10	15.8	0.632911	4.2	142	3.6	8.8	146	0.7	0	0	1	0	0	0	0	0	0	0	0	22	21	1	0	1	0	0	1	0	4.62	2.46	0	0
49	2	127.4	175	41.6	36.83	50	78	65	22	89	9.8	346	12.2	12.9	0.945736	2.6	139	4.5	7.6	221	0.9	0	0	0	0	1	0	0	0	0	1	4	40	27	3	0	0	0	0	0	1	10.32	10.44	1	1
33	1	78	168	27.6361	36.39	128	114	57	42	96	9.6	152	8.6	15.5	0.554839	2.3	132	4	7.2	100	1.8	0	0	0	1	1	0	0	1	0	0	5	80	29	1	0	1	0	0	0	0	14.74	2.74	0	0
23	1	110	168	38.9739	37.28	125	134	72	28	99	12.4	203	11.4	12.3	0.926829	2.8	138	4	8.1	115	1	1	0	0	0	0	0	0	0	0	1	1	26	24	1	0	0	1	0	0	0	10.04	2.05	0	0
48	1	53.8	160	21.0156	37.78	121	116	56	37	80	8.8	132	7.8	15.9	0.490566	2.8	139	4.2	7.3	109	1.1	0	0	0	0	1	0	0	0	0	1	6	62	41	0	0	1	0	0	1	0	21.14	3.18	0	0
72	1	107	157	43.4095	36.5	87	119	58	21	99	42.4	559	10	11	0.909091	2.8	137	9.3	7.3	346	1.3	0	1	0	1	1	0	0	1	0	1	3	53	24	8	0	1	1	1	1	1	9.16	8.94	1	1
48	2	147.3	168	52.1896	37.5	103	143	101	26	98	10.5	526	9.5	15.6	0.608974	2.8	140	3.4	8.7	154	0.6	0	0	0	0	1	1	0	0	0	1	0	28	33	1	0	0	0	0	1	1	14.8	10.72	0	0
67	2	127.09999999999998	185	37.1366	37.28	118	132	87	24	100	11.2	151	13.2	13.3	0.992481	2.8	135	5.1	8.5	156	1.3	0	0	0	0	1	0	0	0	0	1	7	49	47	9	0	0	0	0	0	1	19.17	17.84	1	1
63	1	83.9	168	29.7265	37.11	80	115	53	13	99	4.7	233	7	14.7	0.47619	2.9	144	3.7	8.1	85	0.8	0	0	1	0	1	1	0	0	0	0	1	31	21	3	0	0	1	0	0	0	8.21	2.76	0	0
46	2	89	168	31.5334	38.22	112	114	75	27	89	7.8	220	11.3	16.2	0.697531	2.8	162	3.5	8.1	285	0.7	0	0	1	0	1	0	0	0	1	0	7	101	36	2	0	0	1	0	1	1	24.59	2.33	0	0
51	2	91.7	175	29.9429	36.67	84	140	73	13	100	11.1	225	10.7	14.3	0.748252	2.8	139	4.2	9	110	0.9	0	0	0	0	0	0	0	0	0	0	1	20	19	1	0	1	0	0	1	0	4.2	1.18	0	0
56	2	106.6	178	33.6447	36.22	88	106	67	27	98	11.1	227	11.7	14.7	0.795918	3.2	142	4.2	8.5	92	0.8	1	0	0	0	1	0	0	0	0	1	1	52	37	2	0	0	0	0	0	1	14.8	10.91	0	0
68	2	96.75	175	31.5918	37.17	107	111	75	13	98	4.9	127	7.5	13.1	0.572519	2.8	139	3.6	8.3	139	0.8	0	1	0	0	1	1	0	0	0	1	10	88	39	3	0	0	0	0	1	1	12.49	7.12	0	0
59	2	77.2	173	25.7944	36.78	84	111	77	13	94	30.7	354	13	14.2	0.915493	2.8	139	4.7	9.1	130	1.1	0	0	0	0	0	0	0	0	0	1	1	26	18	1	0	1	0	0	1	0	11.61	1.35	0	0
73	1	92.1	175	30.0735	35.94	77	129	54	17	98	22.5	34	7.8	19.1	0.408377	2.8	132	4.9	8.6	206	1.6	0	1	1	1	1	0	0	1	0	1	6	54	24	10	0	0	0	0	1	0	5.88	2.75	0	0
59	1	137.2	168	48.6111	37.33	86	83	66	26	100	19	101	11.6	13.7	0.846715	3	138	3.6	8.4	157	1.9	0	1	0	1	0	0	1	1	0	1	4	38	22	4	0	0	0	0	1	0	4.84	1.05	0	0
69	2	93.03333333333335	168	32.9625	36.33	116	151	94	32	95	7	216	9.9	13	0.761538	2.8	139	4.3	8.2	112	0.9	0	0	0	0	0	1	0	0	0	1	0	34	31	2	0	1	0	0	1	0	5.05	2.1	0	0
57	2	199	168	70.5074	37.67	136	125	100	45	96	15.2	645	8.4	20	0.42	2.5	133	4.9	8.2	125	1.5	0	0	0	0	0	1	0	0	0	1	2	53	33	3	0	0	0	0	1	0	44.32	1.75	0	0
62	1	54.8	168	19.4161	37.33	89	143	67	16	96	9.4	145	9.6	17.8	0.539326	2.3	130	3.8	8.1	111	0.3	0	0	0	0	0	0	0	0	0	0	2	29	16	3	0	0	0	0	0	0	8.94	1.5	0	0
69	2	89	180	27.4691	36.89	74	113	68	13	96	53.8	421	8.8	18.1	0.486188	2.8	142	4.8	8.3	135	0.8	0	1	1	0	1	1	0	1	0	0	7	26	28	3	0	1	0	0	1	1	6.07	1.24	0	0
61	1	42.7	168	15.129	35.83	128	118	79	23	86	5.1	275	7.6	17.6	0.431818	2.8	133	4.9	6.5	96	0.6	0	0	1	0	0	1	0	0	0	1	6	82	49	4	0	0	0	0	1	0	45.22	1.42	0	1
48	1	73	170	25.2595	36.61	107	95	55	32	88	8.7	347	11.5	13.6	0.845588	1.1	139	2.2	4.1	433	0.8	1	0	0	0	1	1	1	0	0	1	16	129	57	3	0	0	0	1	1	1	22.75	22.74	0	0
42	2	84.8	173	28.3337	36.61	91	105	62	27	92	59.6	39	7.7	16.7	0.461078	1.6	135	4	6.4	126	6	0	0	0	0	1	0	1	0	1	1	13	60	25	6	0	0	0	1	1	0	97.79	36.34	0	0
48	2	76.1	168	26.9629	36	64	97	47	21	92	7.3	181	9.9	14.7	0.673469	2.8	102	3.6	7.5	101	0.3	0	0	1	0	1	0	0	0	0	1	3	34	29	2	0	1	0	0	0	1	35.3	35.23	0	0
78	2	77	168	27.2817	36.78	102	106	76	15	93	13.1	190	13.5	14.1	0.957447	2.9	140	3.8	7.3	232	1.3	0	0	0	0	1	0	1	1	0	1	6	50	38	7	0	1	0	0	1	0	20.81	2.73	0	0
64	2	94.5	183	28.2182	36.44	125	93	66	35	93	3.6	144	8.8	15.4	0.571429	2.8	144	4.6	7.5	141	1.3	0	0	0	0	1	0	0	0	0	1	8	58	42	3	0	1	1	0	1	1	19.41	5.37	0	0
74	2	83.3	178	26.2909	37.17	78	147	78	20	96	6.4	120	14.2	13.7	1.0365	3.4	139	3.6	8.4	100	1.2	0	0	0	0	1	0	0	0	0	1	3	20	21	3	0	1	1	0	1	0	6.75	1.93	0	0
65	2	86.2	168	30.5414	36.56	83	127	98	22	97	8.3	162	12.7	14.4	0.881944	2.8	140	4.9	8.9	101	0.8	0	0	0	0	0	1	0	0	0	1	5	32	31	4	0	0	1	0	0	1	3.88	2.33	1	1
65	1	121.2	165	44.5179	36.5	76	85	59	16	97	18.4	267	10.8	14.6	0.739726	2.6	140	4.7	8	177	0.7	0	0	0	0	0	0	0	1	0	1	4	37	30	4	0	0	0	0	1	1	7.5	2.22	0	0
29	1	253	160	98.8281	37.28	90	111	60	18	100	23.2	319	8.8	17	0.517647	3.4	138	4.5	9.2	230	0.6	0	0	0	0	0	0	1	0	0	1	5	40	32	4	0	0	0	0	1	0	6.95	1.44	0	0
74	1	87.45	168	30.9843	36.72	99	100	45	25	99	19.5	212	9.6	19.9	0.482412	2.8	146	4.6	10.3	271	2.9	0	1	0	0	1	0	1	1	0	0	8	59	32	10	0	0	0	0	0	0	15.08	1.09	1	1
61	2	73	168	25.8645	36.61	106	112	83	23	95	11	238	11.8	17.1	0.690058	2.9	141	4.1	7.9	136	1.3	0	0	0	0	0	0	0	0	0	1	1	36	37	5	0	0	0	0	1	0	6.56	2.43	0	0
64	2	77.15	147	35.7027	37	100	98	64	16	100	4.9	73	10	13.4	0.746269	2.8	137	5.1	7.8	122	1.1	0	1	0	0	1	0	0	1	0	1	10	73	39	3	0	1	0	0	1	1	7.91	2.33	0	0
32	1	119.1	168	42.1981	37	85	122	63	24	100	7.3	201	9.8	14.2	0.690141	2.8	141	3.8	8.3	62	0.7	1	0	0	0	0	0	1	0	0	0	2	21	19	3	0	1	0	0	0	0	9.96	1.94	0	0
49	1	125	168	44.2885	36.61	103	95	61	14	99	19	309	9.6	17.6	0.545455	2.8	140	5.6	8.5	132	1.4	0	0	1	0	0	0	0	0	0	1	6	41	25	3	0	0	0	0	1	0	8.51	3.81	0	0
35	1	59	168	20.9042	36.5	111	115	87	15	96	12.9	98	6.8	20.4	0.333333	2.8	137	2.9	8.1	72	0.4	0	0	0	0	0	0	0	0	0	1	1	27	23	7	0	0	0	0	0	0	9.92	1.03	0	0
70	1	42	155	17.4818	37	148	167	104	20	100	16	205	14.5	14.2	1.02113	3	142	3.3	8.8	129	0.8	0	0	1	0	1	1	0	0	0	1	9	89	49	6	0	0	0	0	1	1	26.9	9.91	0	0
28	2	111	178	35.0335	37.83	86	157	81	19	100	12.4	205	13.9	12.5	1.112	2.8	142	3.1	8.7	121	0.7	0	0	0	0	1	0	0	0	0	1	0	20	27	0	0	0	0	0	1	1	39.06	10.3	0	0
43	1	60	168	21.2585	36.56	78	84	47	14	100	10.8	171	11.5	14.7	0.782313	3.1	139	4.2	8.2	162	0.6	1	0	0	0	0	0	0	1	0	0	3	45	24	3	0	0	0	0	1	0	18.32	1.12	0	0
47	1	100.4	168	35.5726	38.28	114	104	52	19	95	10.8	289	8	17.9	0.446927	2.8	136	4.3	8.1	222	0.7	0	0	0	0	1	1	1	0	0	1	3	49	22	2	0	1	0	0	1	1	17.05	6.41	0	0
66	1	89	163	33.4977	37	151	78	58	25	100	10.9	113	9.7	13.2	0.734848	3	143	3.8	9.3	428	1.1	0	0	0	0	1	0	0	0	0	1	10	58	47	7	0	0	1	0	1	1	20.81	5.11	0	0
50	1	113.15	168	40.09	36.72	100	134	75	19	95	26.3	286	14.4	14.7	0.979592	2.8	142	3.8	8.5	134	0.8	1	0	0	0	1	0	1	0	0	1	3	47	31	4	0	1	1	0	1	0	6.82	6.77	0	0
70	2	91.8	168	32.5255	38	145	147	82	23	98	8.9	572	8.7	15.7	0.55414	3.4	133	5.6	8.7	192	1.4	0	1	0	0	1	0	0	0	0	0	3	51	35	10	0	0	1	0	1	0	3.98	1.28	0	1
46	2	80.05	175	26.1388	36.61	121	117	66	39	92	23.9	17	9.9	15.4	0.642857	2	125	5.7	7.8	74	5.7	0	0	0	0	1	0	0	0	0	1	20	146	56	1	0	0	0	1	1	1	46.92	8.9	0	0
68	2	119	173	39.7608	37.5	102	116	78	16	100	10.7	161	15.2	13.9	1.09353	2.8	143	4.1	8.9	121	1	0	0	0	0	1	1	0	0	0	1	2	23	35	6	0	1	0	0	1	1	40.55	26.64	0	0
54	2	110.92307692307692	185	32.41	NULL	80	NULL	NULL	22	93	10.4	60	4.9	15.8	0.310127	2	145	4.3	9.2	66	5.3	0	1	1	0	0	0	0	1	0	1	14	82	37	4	0	0	1	1	0	1	8.13	1.39	1	1
39	2	110	170	38.0623	36.33	103	121	85	16	94	8.7	210	13.7	13.7	1	4.4	142	4	9.4	117	1.4	0	1	0	1	0	0	0	0	0	1	2	27	20	2	0	0	0	0	0	0	3	1.77	0	0
70	1	66	150	29.3333	36.94	110	128	96	22	94	15.8	151	12.9	14	0.921429	2.8	135	4.8	10	144	1.3	0	0	0	0	0	1	0	0	0	1	4	50	38	6	0	1	1	0	1	0	2.11	1.05	1	1
54	1	124	168	43.9342	36.67	71	144	89	17	95	8	311	11.4	14.2	0.802817	2.8	138	3.7	8.2	136	0.6	0	0	1	0	0	0	0	0	0	1	5	31	27	3	0	0	0	0	1	0	8.97	4.93	0	0
56	2	101.5	183	30.3085	37.5	108	118	93	63	93	21	207	9.4	19.2	0.489583	3	134	3.8	8	116	1.2	0	1	0	1	1	0	0	1	1	1	10	67	30	7	0	1	0	0	1	0	2.29	2.15	1	1
76	1	88.35	168	31.3031	36.89	55	109	49	19	97	21.9	410	12	16.1	0.745342	3.1	136	4.4	9.8	749	2.1	0	1	1	1	1	0	1	1	0	1	11	88	48	8	0	0	0	0	1	1	44.38	26.25	0	0
50	2	103.75	178	32.7452	37.11	139	78	50	19	100	20.9	148	10.3	13.6	0.757353	2.8	139	4.2	7.2	340	1.6	0	0	0	0	1	1	1	0	0	1	3	58	34	4	0	0	0	0	1	1	28.07	22.74	0	0
66	1	140	173	46.7774	36.67	107	131	65	25	96	37.3	265	8.8	14.7	0.598639	2.8	137	6.3	7.1	332	1.7	0	0	1	0	1	0	0	0	0	1	11	86	47	6	0	0	1	0	1	1	21.29	16.71	0	0
49	2	68	168	24.093	36	119	125	81	11	96	11.9	319	10.3	16.8	0.613095	2.9	137	3.8	9.3	139	0.7	1	0	1	0	0	1	0	0	0	0	1	22	27	2	0	0	0	0	1	0	18	2.75	0	0
67	2	181	178	57.1266	36.94	81	142	72	16	97	21	155	11.7	15.7	0.745223	2.7	141	3.7	8.5	101	1.1	0	1	1	0	1	0	0	0	0	1	4	23	22	4	0	1	0	0	0	0	6.59	2.53	0	0
70	1	41.4	168	14.6684	37	96	144	69	19	99	7.6	233	8.8	13.6	0.647059	2.3	126	3.4	7.6	101	0.5	1	0	0	0	0	0	0	1	0	1	1	32	29	5	0	0	0	0	0	0	22.8	1.85	0	0
27	1	73.8	168	26.148	36.61	108	105	65	30	97	3.6	105	7.3	18.5	0.394595	3.4	137	3.3	8.7	117	0.8	1	0	0	0	1	0	0	1	0	1	6	53	31	1	0	1	0	0	0	0	8.73	1.8	0	0
58	1	90.9	155	37.8356	36.83	74	132	74	23	97	17.4	319	10.9	14.5	0.751724	3.3	143	5.1	7.6	119	1.7	0	1	0	0	1	0	0	0	0	1	11	91	46	1	0	1	1	0	1	1	51.77	16.92	0	0
71	1	52.4	152	22.6801	36.94	86	136	96	28	100	9.6	500	13.3	19.8	0.671717	2.9	143	3.6	10	138	0.5	0	1	0	0	1	0	1	0	0	1	0	27	38	10	0	0	0	0	1	1	7.88	3.87	0	0
70	2	76.6	168	27.14	36.28	85	116	67	35	91	7.1	274	8.3	15.7	0.528662	2.8	131	2.8	8.2	94	0.3	0	0	1	0	1	1	0	0	0	1	2	39	31	10	0	1	0	0	0	0	23.73	2.64	0	0
41	1	88.6	168	31.3917	36.67	114	85	50	23	95	21.9	733	9.1	14.9	0.610738	2.8	131	4.1	9.1	112	1.5	0	0	1	0	1	0	0	1	0	1	2	53	29	1	0	0	0	0	1	0	17.06	3.02	0	0
74	1	125	160	48.8281	36.72	101	186	166	13	100	18.1	512	6.9	18.5	0.372973	2.6	146	4.8	7	88	4.1	0	0	0	1	0	0	1	1	0	1	7	72	43	9	0	0	0	0	1	1	25.65	4.75	0	0
74	1	74	168	26.2188	36.89	86	148	78	16	100	6.2	197	9.7	14.3	0.678322	3	139	3.4	10.4	119	1.4	0	1	0	1	0	0	1	0	1	1	2	44	28	9	0	1	1	0	1	0	21.66	1.55	0	0
80	2	113.7	178	35.8856	37.06	104	94	56	19	96	12.7	249	10.2	14	0.728571	3	138	6.3	8.5	252	1.7	0	0	0	0	0	1	0	0	0	1	10	58	45	4	0	1	0	0	1	1	9.39	2.51	0	0
69	2	114	193	30.6048	36.78	88	93	56	18	100	9.3	73	8.8	15.1	0.582781	2.5	132	4.7	7.5	210	1.7	0	1	1	0	1	0	0	0	0	1	5	40	31	8	0	0	0	0	1	1	24.8	3.96	0	0
61	1	85.65	173	28.6177	36.5	123	132	80	23	100	4.6	242	9.7	18.4	0.527174	3	140	4	8.6	120	0.8	0	1	0	0	0	0	0	0	0	1	0	26	25	3	0	1	0	0	1	0	12.38	2.57	0	0
53	2	99	168	35.0765	36.67	84	105	72	18	100	12	125	9	15.6	0.576923	3	145	5.8	7.5	76	0.6	0	0	0	0	0	0	0	0	0	1	5	17	33	2	0	0	1	0	1	1	6.13	3.4	0	0
70	1	106.9	168	37.8756	37.5	100	125	50	11	89	11.2	77	7.2	17.2	0.418605	2.4	140	5.5	7.6	102	1.1	0	0	0	0	1	0	0	0	0	1	4	46	22	6	0	1	0	0	1	0	50.99	2.13	0	0
61	1	114.35	173	38.2071	37.83	91	141	98	28	92	14.5	464	9.9	13.3	0.744361	3.4	137	4.7	8.4	126	1	0	0	0	0	1	1	0	0	0	1	9	104	45	2	0	0	1	0	1	1	15.3	5.85	0	0
36	1	75.6	173	25.2598	36.56	60	107	65	13	99	6.9	176	11.6	14.1	0.822695	2.2	147	3	5	59	6.2	0	0	0	0	0	0	0	0	0	1	5	69	24	2	0	0	0	0	0	0	20.93	2.83	0	0
40	1	75.5	168	26.7503	36.5	95	120	94	25	93	9.7	142	11.8	13	0.907692	2.8	140	3.9	7.2	93	0.8	0	0	0	0	0	0	0	0	0	1	1	14	17	0	0	0	0	0	1	0	3.83	1.71	0	0
64	2	156	180	48.1481	37	76	114	65	16	100	11.5	104	13	17	0.764706	2.4	139	4.8	8.4	115	1	0	1	0	0	1	0	0	1	0	1	11	27	37	8	0	0	0	0	1	1	27.39	13.42	0	1
69	2	75.2	178	23.7344	36.39	74	106	63	16	100	11.8	108	10.1	15.7	0.643312	2.8	137	4.9	8.2	105	0.9	0	1	0	0	0	1	0	0	1	1	5	26	31	3	0	0	1	0	1	1	7.93	1.27	0	0
58	1	76.2	165	27.989	37.61	97	143	78	29	100	4.9	152	12.6	19	0.663158	3.4	128	4.4	8.5	137	0.5	1	0	0	0	1	1	1	1	0	1	5	20	30	4	0	0	0	0	1	1	18.97	4.81	0	0
64	2	113.5	180	35.0309	36.56	92	91	56	13	98	9.5	125	11.3	13	0.869231	2.8	134	4.8	8.4	138	0.8	0	0	1	0	0	1	0	0	0	1	5	31	33	2	0	0	0	0	1	1	4.7	1.8	0	0
52	1	60.5	168	21.4357	37.11	80	116	68	12	100	4.3	74	6.8	13.7	0.49635	2.8	141	5.4	8.9	122	0.6	1	0	0	0	0	1	1	0	0	1	5	34	25	3	0	0	0	0	1	1	11.38	3.04	0	0
50	2	107.05	183	31.9657	37.06	77	129	80	22	94	10.2	157	11.6	13.7	0.846715	2.8	142	3.4	8.6	127	0.7	1	1	0	0	0	1	0	0	0	1	1	42	24	1	0	0	0	0	1	0	3.65	2.55	0	0
63	2	77	168	27.2817	36.83	123	163	126	24	93	12.6	231	17.7	14.5	1.22069	3.6	138	5.3	8.7	390	1	0	0	0	0	0	1	0	0	0	1	0	45	25	2	0	1	0	0	1	0	117.46	4.42	0	0
66	2	105.2	168	37.2732	36.44	85	124	53	14	100	9.7	84	11.1	19.3	0.57513	3.1	128	4.6	8.6	65	3.9	0	0	1	0	1	1	0	0	0	1	10	92	32	7	0	1	1	1	1	1	11.22	11.27	1	1
47	2	68	175	22.2041	36.72	96	92	59	15	96	17.4	184	12.3	12.1	1.01653	2.8	142	4.4	9	135	1	0	0	0	0	0	1	0	0	0	1	1	34	21	1	0	1	1	0	0	0	5.75	2.71	0	0
55	1	76.8	170	26.5744	36.89	70	116	66	15	100	5.1	130	9.5	13.8	0.688406	2.1	139	3.9	7.7	124	0.6	0	0	0	0	1	0	0	0	0	1	4	36	32	4	0	0	0	0	1	1	26.67	25.75	0	0
71	2	129	170	44.6367	38.17	83	107	53	23	98	11.6	221	12.7	13	0.976923	3.4	142	4.5	8.1	188	1.1	0	0	0	0	1	1	1	0	0	1	4	37	31	5	0	0	0	0	1	1	11.69	11.57	0	0
53	2	77.3	152	33.4574	36.56	55	138	92	18	97	6.3	34	12	14.6	0.821918	2.8	135	4.1	8.2	101	0.6	0	0	0	0	0	0	0	0	0	1	3	30	22	3	0	0	0	0	0	0	5.89	2.01	1	1
67	2	97	168	34.3679	37.39	80	96	46	14	100	8.3	205	10.5	14.6	0.719178	2.8	144	3.1	8.9	157	0.8	0	0	1	1	0	0	0	0	0	1	3	21	29	2	0	0	1	0	1	1	13.77	1.28	0	0
36	1	67.6	168	23.9512	37.17	86	107	76	24	87	8	342	11.4	11.3	1.00885	3.5	138	4	8.7	101	0.6	0	0	0	0	0	0	0	0	0	0	1	37	25	0	0	0	0	0	0	0	7.85	1.87	0	0
65	2	65.2	185	19.0504	37.56	64	155	81	20	100	11.4	513	9	13.4	0.671642	2.9	134	4.9	9.2	117	0.6	0	1	0	0	1	1	0	0	0	1	1	20	34	5	0	0	0	0	0	1	65.84	25.16	0	0
48	1	101.7	168	36.0332	36.56	117	132	93	25	97	10.4	171	12.1	16.5	0.733333	2.8	135	3.9	8.6	115	0.5	0	0	0	0	0	0	1	0	0	1	2	33	24	7	0	0	0	0	1	0	15.56	3.25	0	0
60	2	129.60000000000002	168	45.9184	37	103	101	70	25	99	20	221	15.7	13.9	1.1295	2.8	141	4.1	9.3	125	1.2	0	0	1	0	0	0	0	1	0	1	3	33	31	6	0	0	1	0	1	0	4.83	4.84	0	0
55	1	103	168	36.4938	36.44	118	114	63	34	96	7.5	113	10.4	18.1	0.574586	2.3	139	4.7	8.4	170	0.6	0	0	0	0	0	0	1	0	0	0	3	33	33	4	0	0	1	0	1	0	15.66	1.22	0	0
72	1	74.5	155	31.0094	36.56	84	126	53	27	95	13.2	197	9.7	15.5	0.625806	2.8	137	3.8	9.3	131	1.4	0	0	0	0	1	1	1	0	0	1	4	68	31	5	0	1	0	0	1	1	10.55	9.24	1	1
61	2	73.4	168	26.0062	37.78	85	100	59	16	100	8.1	181	9.9	14.1	0.702128	2.8	137	3.6	9.3	102	0.9	0	0	1	0	1	0	0	1	0	1	1	39	35	5	0	0	0	0	0	1	4.99	4.98	1	1
71	2	122.9	168	43.5445	37.06	77	132	50	15	99	9.7	263	8.9	13.9	0.640288	2.8	137	4.4	8.3	97	1.5	0	0	0	1	0	0	1	1	1	1	3	34	27	12	0	0	0	0	1	0	15.04	2	0	0
67	2	87.5	178	27.6165	36.61	74	135	106	16	93	14.7	439	9	17.2	0.523256	2.5	143	4.5	8.9	123	4.7	0	0	0	0	1	0	0	1	0	0	12	45	33	5	0	0	1	0	0	1	5.99	4.58	0	0
67	2	100	183	29.8606	37.17	82	123	70	18	96	17.1	158	10	14	0.714286	2.5	140	4	8.1	125	0.8	0	1	0	0	1	1	0	0	0	1	4	42	33	4	0	0	0	0	1	0	25.35	6.59	0	0
61	1	77.5	168	27.4589	37.61	104	149	85	30	99	10.7	511	8.3	15.3	0.542484	2.7	132	4.6	8.5	116	0.6	0	0	0	0	0	1	1	0	0	1	3	40	31	12	0	0	1	0	1	0	7.97	1.95	1	1
38	1	85.6	168	30.3288	36.89	133	110	77	20	100	5.8	57	12.4	14.4	0.861111	2.3	141	4	6.9	188	0.9	0	0	0	0	1	0	0	0	0	1	6	69	32	1	0	0	0	0	1	0	23.38	5.37	0	0
36	2	116	170	40.1384	NULL	131	121	78	16	96	21.3	141	13.7	14.1	0.971631	2.9	147	5.1	8	103	3.4	0	0	0	0	1	0	0	0	0	1	16	110	49	0	0	1	0	1	0	1	1.83	1.95	1	1
78	1	39.45	168	13.9775	37.11	94	118	89	24	94	7.6	176	10.4	15.9	0.654088	2.7	154	3.4	9.2	203	0.5	0	1	0	0	1	0	0	1	0	1	4	42	34	4	0	0	0	0	1	0	8.18	3.8	1	1
80	2	88	168	31.1791	36.67	101	98	47	28	93	2	77	8.4	16.5	0.509091	2.1	136	4.7	6.9	218	1.1	0	1	1	0	0	1	1	0	0	1	5	55	28	8	0	0	0	0	1	0	6.86	2.3	0	0
61	1	66.3	155	27.5963	38	89	129	104	25	96	6.1	113	11.1	14.6	0.760274	2.8	131	3.4	8.2	142	0.3	0	0	0	0	0	0	0	0	0	1	6	44	35	6	0	0	1	0	1	0	38.88	5.07	0	1
69	1	80	165	29.3848	36.89	77	140	73	16	100	13.9	108	9.3	17.2	0.540698	3.2	140	4.1	8.8	192	0.6	1	0	0	0	0	1	0	0	0	1	9	40	33	5	0	1	0	0	1	1	8.82	1.85	0	0
74	1	87.5	168	31.002	36.39	112	117	75	15	95	13.1	240	12.8	13.2	0.969697	2.3	135	3.4	8.2	141	0.9	0	0	0	0	1	0	0	0	0	1	8	54	42	3	0	0	0	0	1	1	10.59	2.44	0	0
63	1	58.7	168	20.7979	36.94	75	146	79	18	98	17.9	339	11.4	13.2	0.863636	2.8	142	2.3	8.8	272	0.8	0	0	1	0	1	0	0	1	0	1	5	46	42	3	0	0	0	0	0	0	26.16	5.2	0	0
70	2	63	168	22.3214	36.5	96	101	69	19	100	11.1	102	9.9	19.3	0.512953	2.8	142	5.4	8.9	117	6.4	0	1	1	0	0	0	1	0	0	1	7	79	42	10	0	1	1	0	0	0	3.57	2	0	0
75	1	71.1	168	25.1913	36.67	77	114	76	28	97	8.4	147	12.5	13.3	0.93985	2.8	134	4	8.5	141	0.7	0	0	0	0	0	1	0	0	0	1	2	23	21	5	0	1	1	0	1	0	7.72	3.77	0	0
55	2	93.2	168	33.0215	37.06	91	94	65	14	98	8.7	192	10.5	18.2	0.576923	1.9	137	6.4	6.5	87	10.7	0	0	0	0	0	0	0	1	1	1	8	77	32	4	0	0	0	1	1	0	12.1	5.04	0	0
54	1	57.7	168	20.4436	37.17	87	143	66	19	96	11	457	8.4	17.3	0.485549	3.4	136	3.9	8.9	66	3.8	0	1	0	0	0	0	0	0	0	1	4	37	19	5	0	0	1	0	1	0	4.2	1.16	0	0
72	1	66.5	157	26.9788	36.28	116	65	51	26	100	13.8	257	9.2	15	0.613333	3.1	137	5.6	7.2	152	1.2	0	1	0	0	1	0	1	0	0	1	5	54	33	8	0	0	0	1	1	1	20.14	8.14	0	0
60	1	132.53333333333333	168	46.9577	36.61	90	110	68	12	95	17.4	206	9.1	15.8	0.575949	2.8	142	3.9	8.2	164	0.7	0	1	0	0	0	0	0	1	0	1	1	24	22	3	0	0	0	0	1	0	13.67	4.3	0	0
49	2	86.35	178	27.2535	36.72	83	128	57	14	97	15.1	219	6.5	15.9	0.408805	2.8	134	4.3	8.1	124	1.1	0	0	0	0	1	0	0	1	0	1	3	45	24	1	0	0	0	0	1	0	17.37	1.21	0	0
72	1	69.8	168	24.7307	36.78	125	108	50	20	95	22.9	168	6.8	13.2	0.515152	3.7	127	3.9	8.2	121	1.3	0	0	0	1	1	1	0	0	0	1	10	112	36	4	0	0	0	0	1	0	7.15	1.39	1	1
36	2	78.3	183	23.3808	38.56	109	113	51	21	100	22.9	141	7.6	16.9	0.449704	3.1	135	4.7	8	161	1.5	0	0	1	0	1	1	1	0	1	1	16	103	50	6	0	0	0	0	0	1	12.32	12.4	1	1
73	2	96.35	178	30.4097	36.67	80	123	66	10	100	13.7	111	10.8	13.1	0.824427	2.8	136	4.5	8.3	153	0.8	0	1	1	0	0	1	0	0	0	0	6	19	25	3	0	0	0	0	1	1	8.52	1.19	0	0
42	2	60	170	20.7612	36.94	66	99	65	16	100	12.7	190	10.3	21.3	0.483568	3.1	136	4.8	7.4	110	1.2	1	0	0	0	1	0	0	0	0	1	7	37	34	4	0	0	0	0	0	1	4.96	1.94	0	0
43	1	58.7	168	20.7979	36.83	127	178	113	23	95	7.5	227	7.9	14.3	0.552448	2.3	134	5.3	8.2	62	16.8	0	0	0	0	1	0	0	1	0	1	4	70	33	5	0	0	1	0	1	1	5.35	3.59	0	0
72	1	66.3	168	23.4906	36.61	89	86	56	20	97	15.5	271	11.7	14.2	0.823944	1.8	138	3.2	6	103	0.6	0	0	0	1	0	1	0	0	0	1	1	44	26	5	0	0	0	0	1	0	18.07	2.88	0	0
50	1	62.7	168	22.2151	37.22	114	100	55	19	100	4.5	119	6.2	25.4	0.244094	2.4	139	4.3	7.4	209	0.4	1	0	0	0	1	0	0	0	0	0	5	54	39	2	0	0	0	0	1	0	7.05	2.46	0	0
61	2	141.75	185	41.4171	36.67	80	100	54	16	96	20.9	136	11.7	13.8	0.847826	2.8	137	5.2	8.3	185	1.3	0	0	0	0	0	0	1	0	0	1	6	34	32	5	0	0	1	0	1	1	8.75	1.93	0	0
53	2	95.60000000000001	170	33.0796	36.94	95	119	86	20	95	9.6	39	13.3	18.9	0.703704	2.8	142	3.6	8.3	113	1	0	0	0	1	1	0	0	0	0	1	11	38	34	3	0	0	0	0	1	1	21.31	13.25	0	0
71	1	75.5	168	26.7503	36.61	103	136	63	20	95	8.6	327	13.6	14.7	0.92517	2.8	142	4.4	9.8	151	0.6	0	0	1	0	0	0	0	0	0	1	1	32	31	3	0	0	1	0	0	0	12.72	7.59	0	0
51	1	134.46666666666667	170	46.5283	35.72	77	90	35	15	98	5.9	204	8.9	18.3	0.486339	3.4	134	5.8	7.4	143	6.4	0	0	0	0	1	1	0	1	0	1	5	70	23	3	0	1	1	0	1	1	29.88	8.97	0	0
64	1	52.833333333333336	160	20.638	37.17	116	93	70	18	97	14.3	180	14.5	14.3	1.01399	2.8	158	2.8	8.4	105	0.6	0	0	0	0	0	1	0	0	0	1	1	21	35	3	0	0	0	0	0	1	1.85	1.8	1	1
69	1	78	168	27.6361	37	101	107	54	38	92	11.7	328	6.6	15	0.44	2.3	132	4.5	9.3	189	0.9	0	0	0	0	1	1	1	0	0	0	2	46	35	3	0	0	1	0	1	0	18.85	1.01	0	0
78	2	76.2	180	23.5185	37.11	70	100	49	15	93	4.4	113	9.2	16.8	0.547619	3.8	137	4.5	8.2	121	1.3	0	0	0	0	1	0	0	1	0	1	3	32	20	5	0	0	1	0	0	0	8.65	1.98	0	0
63	1	63.4	168	22.4632	37.17	105	115	61	18	96	10.6	130	8.5	17.7	0.480226	2.3	127	3.6	8.4	104	0.5	0	0	0	0	1	0	0	1	0	0	2	38	21	5	0	0	0	0	1	0	23.07	1.11	0	0
76	2	60.75	168	21.5242	36.83	100	136	63	24	90	5.9	100	9.1	13.8	0.65942	2	132	3.5	7.5	199	1.2	0	0	1	0	0	0	1	1	0	1	5	46	24	7	0	0	1	0	1	0	11.31	2.33	0	0
75	2	73.4	168	26.0062	36.56	117	94	56	17	92	10.4	153	6.7	16	0.41875	2.4	136	4.5	7.8	116	0.7	0	0	0	0	0	0	0	0	0	0	4	44	21	3	0	1	1	0	0	0	31	2.05	0	0
60	2	100	185	29.2184	36.33	63	105	67	19	95	15.9	55	13.4	14.2	0.943662	2.3	134	3.8	8.3	112	5.3	0	0	1	0	1	1	0	0	0	1	14	69	33	1	0	1	0	0	1	0	22.36	2.38	0	0
51	2	92.45	168	32.7558	37.33	91	81	51	13	96	7.9	140	7.8	16.4	0.47561	2.8	142	4.3	8.2	219	1.1	0	0	1	0	0	0	1	0	0	0	4	37	22	11	0	0	1	0	1	0	14.13	3.64	0	0
71	1	58.13333333333333	168	20.5971	36.83	60	174	97	12	97	7	239	12.6	13	0.969231	2.8	142	4.5	8.7	107	0.7	0	0	1	0	0	1	0	0	0	1	1	29	33	3	0	0	0	0	1	0	3.27	1.27	0	0
62	2	75.6	168	26.7857	36.5	88	151	66	20	99	12.2	249	12.6	11.7	1.07692	2.8	115	3.3	8.3	118	0.6	0	1	0	0	0	0	0	1	0	0	1	19	21	3	0	0	1	0	0	0	6.72	1.81	0	0
55	2	101.9	183	30.4279	35.94	65	139	87	13	99	10.3	213	15.6	13.5	1.15556	2.8	140	4	8.8	98	1.8	0	0	0	0	0	0	1	0	0	1	1	35	21	6	0	0	0	0	0	0	7.8	2.15	0	0
47	2	72	168	25.5102	37.33	126	143	92	23	99	7	134	9.7	14.5	0.668966	2.8	136	3.7	8.4	114	0.6	1	0	1	0	1	0	0	0	0	0	1	22	19	0	0	0	0	0	1	0	8.38	5.65	0	0
60	2	97	175	31.6735	37.5	103	125	60	18	100	14.6	199	14.1	11.8	1.19492	3.5	133	5.7	8.2	529	1	0	1	0	0	1	1	0	0	0	1	4	58	34	7	0	0	0	0	1	1	39.86	25.11	0	0
79	1	71.5	152	30.947	37.11	104	109	66	24	94	13.3	248	6.8	18.2	0.373626	3.2	140	4	8.8	232	0.9	0	0	0	0	1	0	1	1	0	1	3	48	38	6	0	0	1	0	1	0	70.62	4	0	0
76	1	92.75	168	32.8621	2.89	51	143	100	14	100	10.9	374	10.3	15.9	0.647799	2.8	142	3.7	7.9	116	0.5	1	0	0	0	1	1	0	0	0	1	3	36	32	5	0	0	0	0	1	1	13.16	3.22	0	0
78	2	53.9	168	19.0972	36.83	131	132	74	23	92	8	92	12.3	15.5	0.793548	3.4	146	3.5	8.6	114	1.5	1	0	0	0	1	0	0	1	0	0	9	76	32	8	0	1	1	0	1	0	16.73	4.6	1	1
68	2	93.15	183	27.8151	36.89	133	110	73	18	95	15.8	152	13.7	14.6	0.938356	3.3	142	4	8.3	195	3.4	1	1	0	0	1	0	0	1	0	0	6	36	40	6	0	0	0	0	1	0	6.17	3.4	0	0
48	2	86.4	168	30.6122	36.61	107	118	78	22	86	13.4	143	16	14.2	1.12676	2.3	131	4.1	7.7	144	1	1	0	0	0	1	0	0	1	0	0	5	50	26	3	0	0	1	0	1	0	27.69	1.86	0	0
53	1	61	157	24.7475	36.56	82	118	57	21	94	7.8	105	10.9	12.7	0.858268	3	143	3.5	8.6	110	0.7	0	0	0	0	1	1	0	0	0	1	4	53	39	2	0	0	0	0	1	1	34.73	21.22	0	0
58	1	103.3	165	37.9431	37.39	133	120	75	23	94	6	388	9	17.8	0.505618	2.8	141	4.1	8.6	105	0.5	0	0	1	0	0	0	0	0	0	0	0	23	26	1	0	0	0	0	1	0	6.59	1.48	0	0
57	1	130	155	54.1103	36.72	115	105	72	20	94	12.6	158	9.7	15.9	0.610063	2.9	141	4.8	7.5	187	1.2	0	0	1	0	1	0	0	0	0	1	17	122	59	3	0	0	1	1	0	1	12.6	12.71	1	1
75	1	61	168	21.6128	36.72	80	102	43	16	96	7.1	299	11.5	16.4	0.70122	2.9	137	3.2	7.6	88	0.6	0	0	0	0	0	0	0	0	0	1	6	38	30	4	0	0	0	0	0	0	5.64	1.66	0	0
44	2	83.95454545454545	168	29.7458	36.44	73	86	58	22	94	8.7	94	13.4	22.3	0.600897	3.8	137	5.9	9.4	91	8.7	0	0	0	1	0	0	0	1	0	1	17	102	36	3	0	0	1	1	1	0	2.11	2.32	1	1
68	1	91	166	33.0237	36.33	99	98	78	28	100	13.9	72	9.9	17.5	0.565714	2.8	138	3.4	8.8	135	1.6	0	0	0	0	1	1	1	0	0	1	11	66	34	6	0	0	1	0	0	0	2.76	3.33	1	1
68	2	98.2	170	33.9792	37	73	NULL	NULL	17	99	13.5	425	9.4	14.9	0.630872	2.5	148	3.7	8.4	139	3.3	1	0	0	0	1	1	0	0	0	1	5	56	47	4	0	0	1	0	1	1	42.67	7.5	0	0
58	2	139.3	168	49.3552	37.06	93	87	55	20	94	9.6	204	11	13.2	0.833333	3.7	134	3.9	8.8	119	0.7	1	0	0	0	0	1	1	0	0	1	1	24	31	10	0	1	1	0	1	0	19.82	1.67	0	0
24	2	70	183	20.9024	37.06	85	137	69	19	98	8.3	210	15	11.8	1.27119	4.4	144	4.2	9.4	97	1	0	0	0	0	1	0	0	0	0	1	3	34	26	0	0	0	0	0	0	1	33.86	8.3	0	0
54	2	74.1	170	25.6401	37.28	67	120	71	20	100	1.2	34	9.1	15	0.606667	2.8	138	3.7	7.7	126	1.3	0	0	1	0	1	0	0	0	0	1	9	46	38	6	0	1	0	0	1	1	8.79	6.05	0	0
79	1	72.4	168	25.6519	37.11	97	101	60	18	94	46.3	240	9.5	18.2	0.521978	2.5	139	3.6	8.6	124	1.6	0	1	1	0	1	0	0	0	0	1	5	56	34	6	0	0	0	0	0	0	69.83	2.62	0	0
67	2	68.1	183	20.335	36.5	92	96	83	10	100	10.7	202	6.2	17.9	0.346369	3	133	5	10	102	0.6	1	0	0	0	1	1	0	0	0	1	2	44	27	5	0	0	0	0	1	0	7.87	1.91	0	0
45	1	244.33333333333334	157	99.125	38.22	114	112	88	11	99	19.2	280	12.1	15.1	0.801325	3.7	122	5.3	9.5	197	2.4	0	0	0	1	1	0	0	1	0	1	7	59	34	3	0	0	1	0	1	1	47.78	36.79	0	0
73	2	111	180	34.2593	35.5	78	107	57	29	100	17.4	233	8.2	17.7	0.463277	2.2	139	4	7.4	186	0.6	0	0	0	0	1	1	1	0	0	1	7	74	48	6	0	1	1	0	0	0	5.56	5.56	0	0
71	1	69.1	163	26.0078	37.06	97	136	68	29	100	10.8	337	8.1	18.6	0.435484	3.5	130	2.9	8.9	90	0.6	1	0	0	0	1	1	0	1	0	1	8	59	40	6	0	0	0	0	1	1	32.94	32.95	0	0
23	2	85	168	30.1162	37.11	94	125	75	15	94	13.2	124	11.7	14.8	0.790541	3.6	155	4.1	8.5	137	0.8	0	0	0	0	0	0	0	0	0	1	5	53	24	3	0	1	0	0	1	0	19.8	19.81	0	0
80	1	56.3	168	19.9476	36.17	80	117	49	21	93	8.2	438	8.6	16.5	0.521212	3	137	3.6	8.6	89	0.8	1	0	0	0	0	1	0	0	0	1	1	27	27	9	0	0	0	0	1	0	11.02	4.7	1	1
47	2	56.9	168	20.1601	36.72	96	83	63	22	100	21.9	206	6.9	15.3	0.45098	4.9	134	4	9.2	112	0.6	1	0	0	0	1	0	0	1	0	1	5	66	28	6	0	0	0	0	1	0	29.58	6.21	0	1
74	1	128.2	168	45.4223	36.67	108	123	75	15	96	10.3	144	11.1	15.7	0.707006	2.8	144	3.9	7.1	161	0.8	0	1	0	1	1	0	1	1	0	1	4	47	45	5	0	1	0	0	1	0	5.88	2.83	0	0
59	1	219.8	152	95.135	37.11	78	146	76	26	96	8.6	251	12.8	14.6	0.876712	2.8	138	4.3	8.7	318	0.6	0	0	0	0	0	1	0	0	0	1	0	19	20	2	0	0	0	0	1	0	5.18	1.81	0	0
59	2	92.9	178	29.3208	35.67	111	126	76	24	95	13.3	388	12.6	13.4	0.940299	3.8	141	5	8.7	122	0.5	0	0	0	0	0	1	0	0	0	0	3	28	26	1	0	0	1	0	1	0	4.04	1.11	0	0
64	2	65.1	173	21.7515	36.72	70	131	64	17	100	9.6	227	12.8	13.2	0.969697	2.8	140	3.7	10	142	1	0	0	1	0	1	0	0	0	0	1	2	45	37	5	0	0	0	0	0	1	15.01	7	0	1
53	2	161.5	178	50.9721	36.39	69	147	63	15	100	17.2	369	6.9	15.3	0.45098	2.2	131	5.8	7	121	6.3	0	0	0	0	1	1	1	0	0	1	10	63	32	6	0	1	0	0	0	1	16.6	8.55	0	0
35	2	88	178	27.7743	37.56	125	107	60	28	91	30.1	240	7.4	15.3	0.48366	2.2	136	4.1	8	96	0.5	1	0	0	0	1	0	0	0	0	1	4	82	44	1	0	0	0	0	1	1	29.53	13.27	0	0
71	2	142	178	44.8176	37.89	67	119	57	20	95	10.8	75	8.9	15.1	0.589404	2.1	134	3.9	8.8	369	2.4	0	1	1	0	1	0	1	1	1	1	10	71	38	10	0	0	1	0	1	0	4.53	4.04	1	1
58	2	102.5	183	30.6071	36.83	115	157	92	25	96	22.1	214	16.9	13.7	1.23358	4.1	143	4.7	8.8	146	1.2	0	0	1	0	1	1	0	0	0	1	4	51	30	1	0	0	0	0	1	1	86.59	12.61	0	0
74	2	75	168	26.5731	36.83	138	82	48	12	100	19.5	376	6.9	14.8	0.466216	2.6	134	5	8.1	205	1.4	0	0	0	0	1	1	1	0	0	1	6	71	43	4	0	0	0	0	1	1	22.83	7.82	0	0
62	2	65	183	19.4094	36.33	90	101	68	32	100	15.6	95	9.9	15.5	0.63871	2.8	141	3.8	7.5	224	1	1	0	1	0	1	1	0	0	0	1	11	72	50	4	0	0	0	0	1	1	13.5	3.67	0	0
33	2	159.4	188	45.0996	37.33	102	134	80	17	76	16.4	192	11	17.2	0.639535	3.1	140	4.5	8.6	68	0.2	0	0	1	0	1	0	0	0	0	1	3	32	39	5	0	1	0	0	0	0	2.64	2.59	0	0
59	2	70.8	193	19.0072	37.11	111	99	68	17	100	12	9	7.1	15.4	0.461039	2.8	138	3.1	7.1	190	0.9	0	1	0	0	1	0	0	0	0	1	9	59	27	4	0	1	0	0	1	0	38.18	5	0	0
53	2	60	168	21.2585	36.89	70	116	69	22	93	8.2	165	12	17	0.705882	3.6	135	5	8.8	193	6.8	1	1	1	0	1	0	1	1	1	1	5	45	18	7	0	0	0	1	1	0	34.66	6.67	0	0
60	2	59.46666666666667	165	21.8427	36.33	79	96	56	16	100	24.1	155	14.1	19.3	0.73057	2.8	131	3.6	8.6	86	3.1	0	0	0	0	0	0	0	1	0	1	10	39	27	4	0	0	1	0	1	0	5.09	2.22	0	0
64	2	96	173	32.0759	1.89	95	99	82	22	98	13.6	197	16	13.2	1.21212	2.6	142	5.5	8.3	231	2	0	0	0	0	1	0	1	1	0	1	12	58	32	6	0	1	0	0	1	1	15.85	5.91	0	0
56	1	99.1	168	35.112	37.44	108	123	77	29	95	176	93	10.5	19.4	0.541237	2.5	140	2.5	7.8	274	0.8	0	0	0	0	1	1	1	0	0	1	3	45	26	5	0	0	0	0	1	0	38.5	6.57	0	0
68	2	74.7	178	23.5766	36.61	67	109	75	14	100	8.2	244	12.7	13.9	0.913669	3	132	4.2	8.8	149	1.2	0	1	0	0	1	1	0	0	0	1	4	49	38	5	0	0	0	0	0	1	38.83	13.57	0	0
67	2	140	173	46.7774	37.44	77	128	83	19	95	8	168	10.3	12.6	0.81746	2.8	137	3.4	8.3	95	0.6	1	0	1	0	1	0	0	0	0	1	2	34	39	3	0	1	0	0	1	1	1.53	1.54	0	0
68	2	76.6	175	25.0122	37	113	135	85	15	99	7.3	213	8.6	23.4	0.367521	2.8	137	4	8.5	92	0.7	0	0	0	0	0	1	0	0	0	1	1	28	19	4	0	1	1	0	1	0	6.96	1.06	0	0
61	1	90	165	33.0579	35.72	127	108	59	27	97	21.4	120	11.6	17.5	0.662857	2.9	139	5.7	7.9	281	1.5	0	0	0	0	1	0	0	0	0	1	12	101	56	2	0	1	1	1	0	1	21.84	21.9	1	1
62	2	100	178	31.5617	35.61	73	168	70	11	97	10.5	287	15.2	14.7	1.03401	2.8	140	3.4	9.6	181	1.3	0	0	0	0	0	1	0	1	0	1	1	22	22	3	0	0	0	0	1	0	1.95	1.25	0	0
68	2	106	191	29.0562	36.39	88	103	53	12	100	16.5	75	10.9	14.3	0.762238	2.8	142	5.9	7.7	139	0.7	0	0	0	0	0	0	1	1	0	1	5	35	17	8	0	1	0	0	1	0	5.8	3.14	0	1
74	1	107	168	37.911	37.11	83	125	111	22	97	7.6	361	12	12.7	0.944882	2.8	135	4.1	8.4	179	0.5	0	1	0	0	0	1	1	0	0	1	1	26	17	5	0	0	1	0	1	0	7.95	2	0	0
74	1	77.7	157	31.5226	38.17	99	108	61	24	94	18.1	296	8.6	14.1	0.609929	3.6	134	3.9	8.5	109	1	0	0	0	0	1	1	0	1	0	1	1	39	30	5	0	0	1	0	1	0	15.78	4.92	0	0
32	1	68.8	168	24.3764	38.5	139	91	57	28	89	12.4	124	10.6	16.8	0.630952	2.8	138	3.2	7.2	121	0.4	0	0	0	0	1	1	0	0	0	0	6	57	38	2	0	1	0	0	1	0	7.73	3.01	0	0
69	2	90	168	31.8878	36.72	78	101	60	27	100	10.8	137	12.2	14.6	0.835616	3.3	142	4.3	10.3	135	1.1	0	1	0	0	1	1	0	0	0	1	5	25	20	3	0	0	1	0	0	1	59.95	40.83	0	1
36	1	81.45	165	29.9174	36.39	104	134	85	16	100	10.2	259	8.4	20.1	0.41791	3.2	139	4.1	8	117	0.5	0	0	0	0	1	0	0	0	0	1	3	55	43	0	0	0	1	0	1	1	109.38	12.04	0	0
74	2	80.63333333333334	168	28.5691	36.94	62	126	59	13	97	7.9	173	14	15.2	0.921053	4	140	4	9.3	108	1	0	0	0	0	0	1	0	0	0	1	1	24	21	3	0	1	0	0	0	0	9.78	1.98	0	0
61	2	61.2	157	24.8286	36.56	94	146	77	21	99	7.9	123	9.5	18.2	0.521978	3.1	137	4	7.2	163	6.4	1	0	0	0	1	0	1	1	0	1	9	39	32	11	0	1	1	0	1	1	10.75	10.03	1	1
65	2	84.5	178	26.6696	38.11	116	171	95	38	87	4.8	138	11.1	14	0.792857	2.6	135	4.2	6	156	1.2	0	1	0	0	1	0	0	0	0	1	7	83	47	2	0	1	0	1	0	1	35.67	35.55	0	0
56	2	110	168	38.9739	36.89	78	71	43	24	97	12	252	10.6	17.9	0.592179	2.8	137	4.8	7.4	292	4	1	0	1	0	1	0	1	0	0	1	10	85	43	6	0	1	0	0	1	1	12.59	8	0	0
79	2	50.5	175	16.4898	36.72	133	111	79	30	100	20.4	231	7.3	15	0.486667	2.3	135	3.8	8.2	252	1.3	0	1	0	0	0	1	1	0	1	0	3	45	39	8	0	0	0	0	1	1	6.23	1.57	0	0
53	1	107.9	168	38.2299	37.06	94	132	32	10	100	3.8	76	7.8	17.3	0.450867	3.2	135	5.5	8.8	186	6.6	0	0	1	1	1	0	1	0	0	1	9	48	19	10	0	0	1	0	0	0	22.58	6.86	0	0
53	2	107.8	178	34.0235	36.94	87	134	87	27	84	15	301	8.7	14.9	0.583893	2.3	133	4.6	7.5	104	1	0	0	0	0	1	1	1	1	0	1	2	32	26	4	0	1	0	1	1	1	23.29	23.37	1	1
32	1	94.5	168	33.4821	36.94	140	129	100	38	99	17.8	361	15.1	13.1	1.15267	2.8	145	3.7	10	180	1.3	1	0	0	0	0	0	0	0	0	1	4	67	34	1	0	0	0	0	1	0	11.88	1.87	0	0
41	1	80.6	168	28.5573	36.78	63	79	47	12	99	10.2	250	11.7	12.9	0.906977	2.8	139	4.6	9.1	158	1.5	0	0	0	0	0	1	1	0	0	0	5	69	23	3	0	1	0	0	0	0	4.49	1.6	0	0
53	2	85.55	168	30.3111	36.44	127	130	77	22	97	1.6	65	10.4	17.4	0.597701	2.2	138	3.2	8.3	188	1.1	0	0	0	0	1	1	1	0	0	1	7	68	28	7	0	0	1	0	1	0	34.73	2.4	0	1
58	1	54.3	152	23.5024	36.67	84	100	66	22	97	5.3	93	12.8	13.4	0.955224	2.9	161	3.1	8.3	482	1.4	0	0	0	0	1	0	0	0	1	0	10	54	30	4	0	1	0	0	0	1	17.88	16.51	1	1
75	2	94.25	168	33.3936	37.78	96	125	71	34	90	8.2	117	12.8	14.3	0.895105	2.8	137	3.6	8.5	146	0.9	0	0	1	0	1	1	1	0	0	1	3	32	22	6	0	0	0	0	1	0	8.28	1.38	0	0
50	2	86	168	30.4705	36.72	78	138	89	22	100	2.7	234	10.9	17.7	0.615819	2.8	135	3.8	9.1	90	1.4	1	0	1	0	0	0	0	0	1	0	1	27	18	13	0	1	0	0	0	0	3.22	1.38	0	0
34	1	60	168	21.2585	36.67	82	NULL	NULL	32	98	25.2	100	10.6	13.7	0.773723	1.9	139	5.1	7.9	179	0.6	0	0	0	0	1	0	0	0	0	0	6	45	39	4	0	0	0	0	0	1	43.75	1.75	0	1
54	2	105.93333333333334	183	31.6323	36.94	82	158	83	16	99	12.9	322	11.9	15.4	0.772727	2.5	139	4.1	7.9	118	0.7	0	0	0	0	1	1	0	0	0	1	5	26	21	2	0	0	0	0	1	1	17.4	6.26	0	0
78	2	135	183	40.3117	37.33	101	84	55	19	97	34.4	107	10.7	14.2	0.753521	2.3	139	3.4	7.3	227	2	0	0	1	0	1	1	1	1	0	1	9	59	43	7	0	0	0	0	1	1	10.83	5.19	0	0
56	1	97.7	160	38.1641	37.11	70	137	58	24	96	9	352	12.3	14.9	0.825503	2.7	139	4	8.3	198	1.6	0	0	0	0	1	1	0	0	0	1	15	96	49	1	0	0	0	0	1	1	14.54	9.43	0	0
56	2	164	168	58.1066	37.33	114	111	67	27	98	11.5	286	7.1	21.3	0.333333	3	140	3.7	8.8	118	0.5	0	0	0	0	1	1	1	0	0	1	5	33	35	2	0	0	0	0	1	0	7.01	1.74	0	0
40	2	83.35	168	29.5316	36.22	117	106	79	25	100	12.5	171	14.7	15.4	0.954545	3.1	132	4.4	8	106	1.3	1	0	1	0	1	0	0	1	1	1	6	49	26	3	0	0	1	0	1	0	15.62	2.5	0	0
79	2	75	168	26.5731	36.44	107	106	68	16	94	7	141	10.9	16.2	0.67284	3.2	144	4.4	9.6	110	1.4	0	1	0	1	0	0	0	0	0	1	5	47	41	5	0	0	0	0	1	0	9.81	2.5	0	1
63	2	82	191	22.4775	36.83	72	98	68	20	90	6	40	11.6	21.5	0.539535	3.1	132	5.2	9.2	266	1.5	1	1	1	0	1	0	1	1	0	1	8	78	32	8	0	1	0	0	1	0	16.11	4.38	0	0
60	1	87.10000000000001	168	30.8603	36.17	76	132	66	17	100	12.9	90	9.2	18.4	0.5	1.8	135	4.1	7.3	227	1.5	0	0	1	0	1	0	1	0	1	1	13	82	52	6	0	0	0	1	1	1	74.91	9.24	0	1
38	1	120.94999999999999	168	42.8536	36.39	85	111	75	17	93	16.3	324	8.3	22.3	0.372197	2.7	135	4.5	8	121	1	0	0	1	1	0	0	0	1	0	1	1	28	22	3	0	0	1	0	1	0	12.36	6.52	1	1
21	2	162	185	47.3338	36.67	109	113	56	18	93	19.8	267	8.7	16.9	0.514793	2.1	131	5.8	9	111	2.6	0	0	0	0	1	0	0	0	0	1	14	93	47	1	0	1	0	1	0	1	3.11	4.24	1	1
61	2	83.5	168	29.5848	NULL	120	154	116	16	94	20.4	317	9.2	17.5	0.525714	2.8	141	5.5	7.5	198	1.8	0	1	0	0	1	0	0	0	0	1	11	65	48	5	0	1	0	0	0	1	0.85	1.03	1	1
51	2	147.3	188	41.6761	38.17	128	101	56	31	95	12.5	62	10	17.2	0.581395	2.1	138	3.9	8.6	156	9.3	0	0	0	0	1	0	1	0	1	1	7	62	33	6	0	0	1	0	1	0	64.66	2.55	0	0
69	2	170	193	45.6388	36.39	65	131	49	23	90	26.9	226	8.8	14.4	0.611111	3	130	5.5	8.4	187	2.1	0	1	0	0	1	1	1	1	0	1	13	68	34	4	0	0	0	1	1	0	16.14	6.23	0	0
79	2	64.2	168	22.7466	36.11	73	109	63	18	95	6	168	7.4	17	0.435294	2.8	137	7.3	8	114	0.8	0	0	0	0	0	1	0	0	0	0	4	45	33	5	0	1	0	0	1	0	5.73	1.62	0	0
27	2	85.2	168	30.1871	38	91	138	74	21	100	5.8	208	9.9	12.4	0.798387	3.6	129	4.1	8.9	113	0.9	0	0	1	0	0	0	0	0	0	0	1	17	18	0	0	1	1	0	0	0	9.23	2.75	0	0
73	2	74	170	25.6055	33.83	88	110	72	28	98	9.3	59	5.3	13.3	0.398496	1.6	136	4	5.2	239	0.8	0	0	1	0	1	1	0	0	0	0	10	75	27	4	0	0	0	0	1	1	18.42	9.89	0	0
77	2	84.45	175	27.5755	36.5	61	109	69	14	99	8.4	138	9.2	13.4	0.686567	2.8	133	4.7	7.8	106	0.8	0	1	1	0	0	1	0	0	1	1	5	31	20	4	0	0	0	0	1	0	6.79	1.13	0	0
77	1	57.1	152	24.7143	36.78	97	121	76	17	100	8	170	9.3	17.8	0.522472	2.8	138	4.3	7.8	103	0.7	0	0	1	0	0	1	0	0	0	1	1	33	24	5	0	1	1	0	0	0	18.93	2.5	0	0
59	1	101.3	165	37.2084	36.94	110	119	64	20	100	17.8	415	6.6	25	0.264	2.5	136	5.4	7.1	298	1.6	0	0	0	0	1	0	1	0	0	1	5	52	37	7	0	0	1	0	1	0	34.71	4.92	0	1
65	2	136	168	48.1859	37.22	158	103	66	18	93	4.8	20	7.2	15.7	0.458599	2.6	138	4	7.1	136	1	0	1	0	0	0	1	0	0	0	1	4	50	23	5	0	0	0	0	1	0	205.04	1.09	0	0
55	2	160	183	47.7769	36.83	90	137	77	10	91	18.5	187	13.6	16.3	0.834356	3.1	133	5.1	8.7	131	2.1	1	1	0	0	1	1	0	1	0	1	10	67	31	6	0	0	0	0	1	1	18.75	18.78	1	1
78	2	65.8	168	23.3135	37	121	128	66	21	100	19.4	166	11.9	13	0.915385	2.8	136	4.1	8.6	238	0.6	0	1	0	0	1	0	1	1	0	1	4	48	39	7	0	0	0	0	1	1	40.18	2.88	0	1
77	1	60	168	21.2585	38.39	122	122	78	37	100	9	198	14.5	13.3	1.09023	2.8	131	4	8.6	137	0.9	1	0	0	0	1	1	0	0	0	0	4	41	34	4	0	1	0	0	1	1	25.09	3.71	0	0
42	1	96.6	168	34.2262	36.67	102	120	91	14	95	6.8	231	9.7	15.7	0.617834	3	133	5.7	9.4	110	8.6	0	0	0	0	1	0	0	1	0	1	7	39	20	3	0	0	1	0	0	0	6.54	1.43	0	0
59	2	72.5	168	25.6874	36.44	87	141	91	16	90	7.9	263	11.5	14.5	0.793103	2.8	139	3.8	8.5	114	0.8	0	0	0	0	0	1	0	0	0	0	1	33	37	2	0	1	1	0	1	0	8.63	1.87	0	0
51	2	125.5	168	44.4657	36.56	90	156	95	18	98	7.6	170	14.5	13.9	1.04317	2.8	144	4.5	9.5	116	1.2	0	0	0	0	0	1	1	0	0	0	1	19	18	2	0	0	0	0	1	0	9.81	1.84	0	0
71	2	66.3	168	23.4906	36.72	86	134	112	16	99	9.5	139	12.4	13.2	0.939394	2.8	139	4.9	9	111	1.3	0	0	0	0	1	1	0	0	0	0	2	28	24	3	0	1	0	0	1	0	1.05	1.06	0	0
69	2	81.94999999999999	178	25.8648	35.28	64	90	45	22	92	8.9	236	9	16.4	0.54878	2.8	138	4.4	7.9	173	0.6	0	0	0	0	0	0	0	0	0	0	2	38	18	5	0	1	1	0	1	0	7.42	1.12	0	0
28	1	91.3	163	34.3634	37.61	120	81	46	24	100	8.2	180	8	14.5	0.551724	3.5	143	3	7.6	86	0.5	0	0	0	0	1	0	0	0	0	0	4	34	40	0	0	0	0	0	0	1	100.54	4.74	0	0
76	1	79.6	168	28.2029	37.06	113	154	60	36	83	10.3	109	14.6	17.6	0.829545	2.6	131	4.9	8.5	352	0.9	0	0	1	1	1	0	0	1	0	1	6	48	34	7	0	0	0	0	1	1	7.74	7.76	1	1
56	1	79.80000000000001	168	28.2738	37.11	73	97	72	14	95	20	336	8	25.5	0.313725	3.8	125	4.5	8.6	156	2.8	0	1	0	1	1	0	1	1	0	1	6	61	27	8	0	1	0	0	0	0	49.82	4.04	0	0
57	2	83.6	178	26.3856	36.06	125	79	40	28	100	16.4	196	8.9	17.2	0.517442	2.1	141	3.2	6.9	193	1.5	0	0	0	0	1	1	0	0	1	1	6	53	43	2	0	0	0	0	1	1	30.83	15.74	0	0
53	1	89.7	168	31.7815	37	81	124	67	13	100	5.3	277	10.5	13.1	0.801527	3	145	3.3	9.1	95	0.8	0	0	0	0	1	0	0	0	0	1	2	31	26	2	0	1	0	0	1	0	9.51	7.9	0	0
54	1	84.2	150	37.4222	36.89	63	108	55	15	98	5.6	46	7.7	19.3	0.398964	4.2	136	4.8	10.5	75	7	0	0	0	0	0	0	1	0	0	1	14	91	31	8	0	0	0	1	0	0	27.02	1.51	0	0
69	1	46.7	168	16.5462	36.33	86	124	75	22	100	15.2	140	10	16.8	0.595238	2.3	163	4	8.4	357	2.7	0	1	0	0	1	0	1	0	0	1	11	77	35	7	0	0	0	1	0	1	40.38	40.56	0	1
26	1	69	173	23.0546	36.67	111	104	59	37	94	20.5	82	11.7	13.7	0.854015	2	139	4.1	6.9	113	0.7	0	0	0	0	1	1	0	1	0	1	10	75	35	3	0	0	0	0	1	1	25.26	22.48	0	0
69	1	66.9	168	23.7032	37.06	135	160	91	29	99	5.1	105	8.2	18.3	0.448087	3.2	144	3.9	8.2	141	0.5	0	0	1	0	0	1	1	0	0	0	1	25	33	6	0	1	0	0	1	0	9.82	1.73	0	0
67	2	99.7	173	33.3122	36.78	59	145	93	31	87	16.8	337	13	13.4	0.970149	3.3	131	5.9	9	166	0.7	0	1	0	1	1	1	1	0	0	1	9	81	47	3	0	1	0	0	1	1	23.86	14.05	0	0
48	1	149	168	52.792	36.61	84	112	64	16	98	16.7	445	8.8	17.4	0.505747	2.2	134	3.1	8	207	1.3	0	0	1	0	0	0	1	1	0	1	4	55	22	8	0	1	0	0	1	0	19.96	2.88	0	0
70	1	50.6	165	18.5859	37.83	112	87	52	33	99	6.9	303	6.6	16.5	0.4	2.8	134	3.8	8.3	134	0.7	1	0	0	0	1	0	0	0	0	0	4	37	31	4	0	1	0	0	1	0	9.83	1.93	0	0
72	1	70.5	137	37.5619	37.17	67	124	78	31	97	6.2	106	11	15	0.733333	3.2	143	4.2	9.2	137	1.3	0	0	1	0	1	0	1	0	0	1	3	44	34	10	0	0	0	0	1	1	16.37	14.57	1	1
22	2	95	168	33.6593	36.78	115	121	109	28	99	13	237	14.1	13.3	1.06015	2.7	146	3.7	7	142	1.2	0	0	0	0	1	0	0	0	0	1	2	41	33	0	0	1	0	0	0	1	17.59	5.4	0	0
68	2	112.95	168	40.0191	36.44	111	124	89	11	95	10.7	262	17.4	16.6	1.04819	3.7	140	6.3	7.4	128	1.7	0	0	0	0	1	1	0	0	0	1	7	66	47	2	0	0	0	1	1	1	40.58	10.56	0	0
65	2	98	168	34.7222	37.39	63	150	75	18	97	10.6	171	11.9	13.7	0.868613	2.8	144	4	9.3	102	1.2	0	0	0	0	0	0	1	0	0	1	2	31	23	6	0	1	0	0	0	0	9.88	1.14	0	0
72	2	64.73333333333333	168	22.9356	36.67	75	145	92	12	99	18.5	381	12.6	14.3	0.881119	4.1	136	4.7	9.5	94	0.6	0	0	0	0	0	1	0	0	0	1	0	25	20	9	0	1	0	0	1	0	60.94	2.1	0	0
25	1	53.5	165	19.6511	36.56	70	102	60	24	97	17.1	162	8.5	16	0.53125	1.5	139	1.9	7.7	74	4.8	1	0	0	0	1	0	0	0	0	1	6	54	19	0	0	1	0	0	0	0	25.48	1.66	0	0
77	1	81.35	155	33.8606	36.89	48	124	63	14	100	14	142	7.9	13.3	0.593985	2.8	141	4.2	8.2	136	0.9	1	1	1	0	0	0	0	0	0	1	6	43	42	5	0	0	0	0	1	1	8.81	3.54	0	0
33	1	88.9	165	32.6538	36.72	94	111	100	22	98	9.4	278	10	16.1	0.621118	2.8	137	4	9.2	105	0.6	0	0	0	0	0	0	1	0	0	0	0	21	21	1	0	0	1	0	0	0	2.91	1.67	0	0
67	1	78.5	168	27.8132	36.94	90	124	75	13	98	18.5	213	8.6	16	0.5375	2.7	139	3.5	8.5	122	0.5	0	0	1	0	1	1	1	0	0	1	1	18	26	3	0	0	0	0	1	0	21.43	21.43	0	0
63	2	176.5	196	45.9444	36.89	118	119	97	24	96	16.7	268	14.9	13.6	1.09559	2.8	134	3.1	8.7	144	0.8	0	0	1	0	0	1	0	0	0	0	1	29	25	3	0	1	0	0	1	0	4.04	1.19	0	0
53	2	164.25	168	58.1952	36.72	117	147	83	26	99	25.6	214	12.1	13.6	0.889706	2.9	142	5.9	7.8	125	1.2	0	0	1	0	1	1	0	0	0	1	7	54	38	2	0	1	1	0	1	1	55.37	2.17	0	0
67	1	61	150	27.1111	36.89	80	125	98	17	96	7	406	11.5	12.2	0.942623	2.8	139	3.5	9.2	138	0.6	0	0	1	0	0	1	0	0	1	0	1	26	24	5	0	1	0	0	0	0	8.22	3.01	0	0
57	1	46.5	157	18.8649	37.06	106	104	68	18	97	7.5	220	7.7	16.8	0.458333	1.8	143	2.9	7	95	1	0	0	0	0	1	0	0	0	0	0	3	62	32	2	0	1	0	0	1	0	3.82	1.68	0	0
64	2	82.4	180	25.4321	36.72	77	124	74	18	96	12.3	263	15.3	12.2	1.2541	2.8	139	4.2	8.2	130	0.9	0	1	0	0	1	1	0	0	0	1	1	34	29	5	0	0	0	0	1	1	19.5	19.5	0	0
64	1	63.6	166	23.0803	36.89	102	104	79	16	99	7.4	84	11.9	18.2	0.653846	2.9	140	3.7	7.5	123	0.6	0	0	0	0	1	0	0	1	0	1	8	16	28	5	0	0	0	0	1	1	29.42	13.77	0	1
52	1	146	168	51.729	36.44	83	92	37	27	100	18.3	268	11.1	16	0.69375	3.2	127	5.7	8.9	154	2.1	0	1	0	0	0	0	0	1	0	1	4	72	28	4	0	0	1	0	1	0	15.87	4.76	0	0
76	2	109.1	168	38.655	37.28	60	129	77	13	99	10.7	240	11.5	13.7	0.839416	4.1	143	4.2	8.9	150	1.1	0	0	1	0	0	1	0	0	0	1	1	25	28	4	0	1	0	0	0	0	2.76	2.79	0	0
39	2	86	168	30.4705	37.39	103	112	60	18	100	15.9	138	12.6	12.9	0.976744	2.8	138	4.2	7.7	120	1.6	1	0	1	0	1	0	0	0	0	1	7	24	18	1	0	1	0	0	0	0	6.13	2.1	0	0
59	2	62.6	168	22.1797	36.78	119	148	84	32	92	20.1	288	14.3	12.6	1.13492	3.1	137	3.5	8.4	103	0.6	0	0	0	0	1	0	0	0	0	1	2	23	25	9	0	1	0	0	1	1	25.52	7.22	0	0
58	1	171.30000000000004	152	74.143	37.5	105	134	84	25	95	18.3	436	9.2	14.5	0.634483	1.9	130	4.4	7.8	165	1.4	0	0	1	0	1	0	1	0	0	1	3	42	24	7	0	0	0	0	1	0	15.65	1.08	0	0
52	2	93.6	180	28.8889	37.22	130	141	69	23	87	25.1	452	7.1	14.4	0.493056	2.4	126	5.4	6.9	140	7.8	0	0	0	0	1	1	1	0	0	1	14	81	36	3	0	1	0	0	1	1	30.4	9.74	0	0
80	1	71.15	147	32.9261	35.67	60	101	67	17	100	8.5	51	10.4	14.1	0.737589	2.7	139	3.3	9	113	0.5	0	1	0	0	1	1	0	0	0	1	6	41	33	7	0	1	0	1	1	1	26.31	26.17	1	1
65	2	90	168	31.8878	36.72	72	141	45	13	97	15.2	170	11.7	13.9	0.841727	2.8	139	3.4	7.7	116	1.3	0	0	0	0	1	1	0	0	0	1	6	31	24	4	0	0	0	0	1	0	16.12	4.05	0	0
63	1	100	168	35.4308	36.17	92	121	62	22	99	10.8	343	12.6	14.3	0.881119	2.9	142	5.1	10.3	220	0.9	0	0	0	1	1	0	0	0	0	1	2	39	33	3	0	0	0	0	1	0	7.88	1.65	0	0
60	2	106.2	168	37.6276	36.33	74	105	66	15	97	12.7	191	11.3	13.3	0.849624	2.8	137	4.8	8.6	193	0.8	0	0	0	0	0	0	0	0	0	0	3	29	31	3	0	0	1	0	0	1	7.54	2.48	0	0
52	1	59.1	168	20.9396	37.89	108	71	39	31	95	33.1	168	13.1	14.6	0.89726	2.8	139	4.8	8.4	442	2.4	0	0	0	0	1	0	1	0	0	0	9	82	34	4	0	0	0	0	1	0	16	1.86	0	0
29	1	111	160	43.3594	37	98	123	73	17	98	10.9	241	8.7	16.8	0.517857	2.8	140	3.8	8.8	102	0.6	0	0	0	0	0	0	0	0	0	0	1	19	18	0	0	1	0	0	1	0	3.96	1.15	0	0
78	2	79.5	183	23.7391	36.33	93	117	70	22	98	12.5	403	9.6	16.1	0.596273	2.8	132	4.1	8.7	94	1.5	0	0	0	0	0	0	0	0	0	1	2	40	28	6	0	1	0	0	1	0	15.86	1.06	0	0
59	2	46.1	168	16.3336	36.83	102	88	70	19	63	21.1	204	10.1	15.2	0.664474	2.8	122	5.1	8.2	353	3.4	0	0	0	0	1	0	0	0	0	1	8	86	44	4	0	1	0	0	0	0	3.89	3.94	1	1
77	1	71.6	168	25.3685	36.67	90	134	45	22	96	7.6	188	10.9	15.2	0.717105	2.8	139	4	9	265	0.8	1	1	0	0	0	1	1	1	0	1	1	30	31	6	0	0	1	0	1	0	7.87	1.97	0	0
78	2	103.39999999999999	173	34.5484	37.78	92	128	46	14	94	3.9	147	10.2	17.6	0.579545	2.8	136	4.9	7.8	194	1.6	1	1	1	0	1	0	1	0	0	1	3	53	26	11	0	0	0	0	1	0	20.27	4.85	0	1
40	1	153.1	168	54.2446	36.89	85	120	61	14	97	17.7	373	6.8	17.3	0.393064	2.8	145	3.7	8.9	160	0.8	0	0	0	0	0	0	0	0	0	0	0	18	14	0	0	1	0	0	0	0	13.91	1.16	0	0
51	1	84.10000000000001	168	29.7973	36.28	104	105	62	35	100	20.8	368	7.1	17.1	0.415205	2.6	123	6.9	7.9	259	2.6	0	0	0	0	0	1	1	0	0	1	3	56	31	5	0	0	0	1	1	0	38.08	3.12	0	0
69	1	99.5	173	33.2453	36.72	113	112	62	20	98	12.3	141	13.3	13.7	0.970803	2.8	143	4	8.6	101	0.9	0	0	1	0	0	0	0	0	0	1	1	28	24	2	0	0	0	0	1	0	2.04	2.04	0	0
21	1	65	170	22.4913	37.83	94	149	111	14	100	7.6	190	15.7	12.4	1.26613	3.2	142	4	8.4	116	0.7	0	0	0	0	1	1	0	0	0	1	4	37	29	0	0	1	0	0	1	1	34.94	13.27	0	0
32	1	118.3	168	41.9147	35.94	119	106	81	16	99	11.1	152	12	13.3	0.902256	2.8	139	3.6	8.8	143	0.8	1	0	0	0	0	0	0	0	0	1	0	30	26	0	0	0	1	0	1	0	2.76	1.77	0	0
79	2	85.5	168	30.2934	36.44	76	111	72	25	100	12.2	181	9.4	18.1	0.519337	3	126	4.7	9	114	4.4	0	1	0	0	1	0	1	0	0	1	5	55	33	8	0	0	0	1	0	0	3.65	2.08	1	1
66	2	74	196	19.2628	36.5	90	169	99	28	100	15.2	372	9.9	13.2	0.75	1.9	134	5	8.4	129	1.1	0	1	0	0	1	0	0	0	0	0	7	46	33	2	0	1	1	0	0	1	9.33	5.17	1	1
61	1	100.16666666666667	155	41.6927	36.89	72	90	47	14	100	9.8	130	16.1	14.8	1.08784	2.7	141	5.6	7.1	278	0.5	0	0	0	0	1	0	0	0	0	1	7	46	32	4	0	0	1	0	1	1	31.32	28.26	0	0
52	1	59	168	20.9042	36.67	144	124	79	23	100	19	216	7.3	13.6	0.536765	2.6	134	4.3	8.3	166	0.7	0	0	0	0	0	1	0	0	0	1	0	52	32	4	0	0	0	0	0	0	10.38	1.77	0	0
33	2	77	168	27.2817	36.5	79	105	73	34	87	14.3	245	7.6	16.3	0.466258	2.8	138	4.4	7.4	90	0.5	0	0	0	1	1	0	0	0	0	0	2	38	39	0	0	0	0	0	1	0	16	2.45	0	0
78	2	86.3	168	30.5768	36.78	88	140	128	16	100	22.4	158	10.6	17.2	0.616279	3	126	4	8.8	110	4.5	0	1	1	0	1	0	1	1	0	1	12	59	38	8	0	0	0	0	1	0	12.95	9.07	1	1
68	2	95.2	168	33.7302	37.06	81	124	76	15	96	7.7	132	14.2	13.6	1.04412	4.1	141	4	9.3	205	0.9	0	0	0	0	1	1	1	0	0	1	2	40	28	4	0	1	1	0	1	0	6.76	5.8	0	0
72	1	110.4	150	49.0667	37.28	101	153	112	22	93	9.7	164	14.4	12.7	1.13386	2.9	135	3.4	8	149	1.5	0	0	0	0	1	1	0	0	0	1	4	48	32	4	0	0	0	0	0	1	26.64	26.72	0	1
53	1	52.1	170	18.0277	36.72	109	159	136	23	86	9.7	157	12.7	13.7	0.927007	2.8	147	3.6	8.4	77	0.7	1	0	0	0	1	0	0	0	0	1	4	57	33	1	0	0	0	0	1	0	12.89	5.94	1	1
75	2	78.3	168	27.7423	36.11	98	149	97	17	97	11.3	181	12.8	13.8	0.927536	3.4	141	4	9.2	118	1	0	0	0	0	0	1	0	0	0	1	2	26	36	4	0	0	0	0	1	0	5.82	1.77	0	0
74	1	74.7	150	33.2	38.06	82	93	59	16	95	19.1	227	11.2	17	0.658824	3	140	4	8.2	171	0.6	0	0	0	0	1	0	1	1	0	1	5	39	33	5	0	0	0	0	1	1	28.48	17.63	0	0
37	2	66.2	183	19.7677	38.72	85	120	75	29	95	17.1	123	7.8	16.9	0.461538	1.8	138	3.9	8.4	416	1.3	1	0	0	0	1	0	0	0	0	1	10	101	47	4	0	0	0	0	1	1	6.93	6.87	1	1
56	2	122.4	152	52.9778	36.61	80	120	105	23	95	10	158	13.9	13.1	1.06107	2.8	143	4.8	9.3	83	1	0	0	0	0	0	1	0	0	0	1	0	20	22	1	0	1	0	0	1	0	3.94	2.93	0	0
63	1	60.4	168	21.4002	37.28	66	100	51	17	94	3.8	151	9.4	14.3	0.657343	2.8	132	3.5	8.6	95	0.5	0	0	1	0	0	0	0	0	0	0	2	32	16	5	0	0	0	0	0	0	8.3	1.5	0	0
70	1	100	170	34.6021	37.33	93	89	54	29	94	21.2	349	10.6	17.2	0.616279	2.7	131	4.9	9.1	248	3.5	0	0	0	0	1	0	1	1	0	1	13	80	47	5	0	0	0	1	0	1	8.83	8.87	1	1
76	2	97.1	168	34.4033	37.72	98	122	86	12	99	22.4	284	9.8	16.2	0.604938	2.8	145	3.3	8.2	170	1.9	0	1	0	0	0	0	0	0	0	1	9	52	36	5	0	1	0	0	0	1	3.29	3.31	1	1
60	2	100	168	35.4308	37.39	128	130	95	17	99	14.9	266	12.2	12.3	0.99187	2.8	139	5.2	8.6	154	1.4	0	0	0	0	0	1	0	0	0	1	1	39	25	2	0	0	1	0	0	0	6.53	1.45	0	0
37	2	88.6	168	31.3917	37.72	117	154	89	15	99	14.4	763	7.8	14.2	0.549296	3.1	144	3.4	8.5	96	0.6	1	0	0	0	1	1	0	0	0	1	4	31	26	2	0	0	0	0	0	1	18.04	2.02	0	0
79	1	95	168	33.6593	36.56	85	92	58	16	99	8	170	8.8	12.3	0.715447	2.7	143	4.5	8.1	207	1	0	1	0	0	0	0	1	0	1	1	1	34	32	12	0	1	0	0	1	1	15.71	1.35	0	0
64	2	79.4	170	27.474	37.67	97	145	69	17	99	7.7	180	7.7	17.2	0.447674	2.7	128	4.7	8.5	296	5.8	0	0	0	0	1	0	1	0	0	1	8	52	39	6	0	1	0	0	1	1	31.79	32.92	0	1
45	1	126	168	44.6429	36.39	170	104	71	30	100	21.3	328	11.8	19.1	0.617801	3	153	3.9	7.7	119	5.3	0	1	0	1	1	1	0	0	1	1	11	76	44	3	0	0	0	0	1	1	19.28	6.14	1	1
46	1	62.5	168	22.1443	36.94	105	114	72	20	98	9.3	252	10.3	14.2	0.725352	2.8	141	4.2	9.5	77	0.5	1	0	1	1	0	0	0	1	0	0	1	29	25	7	0	0	0	0	0	0	5.65	2.46	0	0
65	2	73.25	170	25.346	37.06	67	127	76	26	97	31.2	570	7	18.8	0.37234	2.4	142	4.2	7.5	177	0.9	0	0	0	0	1	1	1	0	0	1	4	48	39	3	0	1	0	0	0	1	96.92	34.04	0	0
78	2	74	178	23.3556	36.61	73	116	76	14	100	7.7	258	8.2	16.5	0.49697	2.3	135	3.7	7.7	101	0.6	0	1	1	0	1	0	0	1	0	0	4	49	46	8	0	0	0	0	1	1	7.82	7.83	0	0
44	2	96.8	168	34.2971	37.83	115	141	88	32	90	17.2	192	7.5	20.8	0.360577	2.1	127	4.3	7.7	152	0.6	0	0	0	1	1	0	0	1	0	1	0	30	25	2	0	0	0	0	0	0	53.72	3.03	0	0
61	1	63.4	152	27.4411	37.06	69	111	78	18	100	39.4	256	9.7	16.7	0.580838	2.1	143	2.7	7	108	0.4	0	0	0	0	1	0	0	1	0	1	4	39	35	4	0	1	0	0	1	1	28.75	7.71	0	0
80	1	47.849999999999994	163	18.0097	36.67	78	151	79	17	96	4.7	296	11.2	14	0.8	3.1	122	4.2	8.5	81	0.5	0	0	0	0	0	1	0	1	0	0	2	30	32	6	0	0	1	0	1	0	5.1	1.22	0	0
76	2	125	168	44.2885	36.67	56	106	91	15	94	11.3	202	7.6	14.4	0.527778	2.5	130	3.9	7.9	98	3.5	0	0	0	0	1	0	1	1	0	1	9	72	22	8	0	0	1	1	1	0	27.01	2.85	0	0
76	2	94.7	183	28.2779	37.17	91	160	67	33	96	12.3	202	13.1	13.2	0.992424	2.8	139	4.2	8.5	134	1.1	0	0	0	0	0	0	0	0	0	1	3	35	32	3	0	0	1	0	0	0	8.66	1.84	0	0
26	1	98.3	165	36.1065	36.83	74	136	37	13	100	7	311	10.4	15.4	0.675325	2.8	135	5	8.6	106	0.8	1	0	0	0	1	0	0	0	0	1	2	29	27	1	0	1	0	0	0	0	2.87	1.01	0	0
30	1	81	170	28.0277	36.39	88	97	46	18	100	21.3	326	7	17.2	0.406977	2.8	140	3.4	8.8	159	1	0	0	0	0	1	0	0	0	0	0	5	47	36	2	0	1	0	0	1	1	15.08	1.02	0	0
59	2	102	170	35.2941	37.06	106	118	70	24	97	11.8	279	6.4	16.1	0.397516	1.8	128	4.5	7.8	184	1	0	0	0	0	1	0	1	0	0	1	2	21	31	3	0	1	0	0	1	1	86.69	3.18	0	0
66	1	101.3	168	35.8914	37.94	106	211	154	21	97	17.5	190	9	18.3	0.491803	2.5	145	3.9	8.1	182	0.8	0	0	0	0	1	1	1	0	0	1	3	41	25	10	0	0	1	0	1	0	16.02	2.33	1	1
32	2	88.5	168	31.3563	37.22	81	138	80	17	100	9.8	456	9.9	14.7	0.673469	2.8	134	4.5	8.7	95	0.9	1	0	0	0	1	0	0	0	0	1	4	39	33	0	0	0	0	0	1	0	6.89	3.08	0	0
67	2	119	168	42.1627	37.28	84	143	89	28	98	7.9	530	8.4	17.3	0.485549	2.9	144	4.2	8.5	141	0.7	0	0	0	0	1	0	1	1	0	1	2	40	41	5	0	0	0	0	1	1	6.24	4.99	0	0
76	2	68	170	23.5294	36.5	78	97	62	15	100	9.8	130	12.4	13.5	0.918519	2.8	140	4.4	7.9	65	1.7	0	0	0	0	1	0	0	0	0	1	8	30	39	5	0	0	0	0	0	1	7.1	2.97	0	0
45	1	100	170	34.6021	36.44	108	127	99	17	96	7.6	161	11.8	12.6	0.936508	3.4	141	4	8.1	107	0.7	0	0	0	0	0	1	0	0	0	1	1	20	17	0	0	0	0	0	0	0	3.03	1.98	0	0
71	2	96	168	34.0136	36.78	80	119	78	24	97	11.9	254	13.1	13.2	0.992424	2.8	143	4.5	9.3	123	0.9	0	0	0	0	0	1	0	0	0	1	1	23	28	7	0	0	0	0	1	0	6.58	6.49	0	0
47	1	59.35	168	21.0282	36.89	137	88	60	13	98	15.9	14	6.7	20.5	0.326829	1.7	133	4.4	6.6	109	0.9	0	0	1	0	0	0	0	0	0	1	8	58	29	9	0	0	0	0	1	0	6.13	1.5	1	1
64	1	175.5	168	62.1811	36.67	62	97	77	28	100	6.9	210	15.1	16.2	0.932099	2.8	144	5.2	9.3	157	1.2	0	0	1	0	0	1	1	1	0	1	4	30	29	7	0	1	0	0	1	1	7.12	1.74	0	0
44	2	123.8	188	35.0272	36.22	113	75	39	22	100	8.6	114	7.1	13.7	0.518248	1.9	129	4.5	4.6	139	5.3	1	1	1	0	1	0	0	0	0	1	17	114	44	4	0	0	0	1	0	0	19.54	19.64	1	1
61	2	109.8	168	38.9031	36.78	68	109	73	18	93	13.5	238	12.9	14.7	0.877551	3	134	6.8	8.2	192	1	0	0	0	0	0	0	0	0	0	1	0	29	22	4	0	1	0	0	1	0	6.73	2.63	0	0
73	2	126.55000000000001	178	39.9413	37.22	113	124	63	38	89	16.7	283	11.7	13.9	0.841727	2.6	142	5	8.6	153	1.7	0	0	0	1	1	0	1	1	0	1	3	45	32	9	0	0	0	0	1	1	28.49	12.07	0	0
74	2	114.8	178	36.2328	36.83	62	100	62	8	100	15	138	7.1	15.5	0.458065	2.8	137	4.8	8	101	1.3	0	0	1	0	0	0	1	0	0	1	7	38	35	7	0	1	0	0	1	1	5.8	1.36	0	0
77	2	107.55	168	38.1059	36.56	61	127	92	12	97	9.4	186	13.8	14.6	0.945205	3.3	138	3.9	8.7	146	1.3	0	1	0	0	0	0	1	0	0	1	3	36	42	10	0	1	0	0	1	1	7.41	3.56	0	0
70	1	105.6	173	35.2835	38.33	106	102	55	25	94	6.7	148	7.8	20.8	0.375	2.7	133	4.1	8.8	103	1.1	0	0	1	0	1	1	0	0	0	1	8	56	29	4	0	0	1	0	1	0	45.48	13.25	0	1
57	1	75	165	27.5482	36.78	105	115	66	21	97	15.6	186	11.8	13.2	0.893939	3.1	139	4.6	9.4	131	0.5	1	0	0	0	1	1	0	0	0	1	7	81	55	1	0	0	1	0	1	1	4.34	3.38	0	0
59	1	137.7	164	51.1972	36.83	92	100	63	18	94	11.1	287	10.7	15.9	0.672956	2.8	138	4.4	8.8	112	0.8	0	0	0	1	1	1	0	0	0	1	4	33	37	1	0	1	0	0	1	1	10.98	6.98	0	0
69	2	82.9	168	29.3722	36.56	129	111	93	21	93	6.3	161	11.1	16.4	0.676829	1.8	129	3.7	7.4	96	0.7	0	0	0	0	1	0	1	1	1	1	12	105	43	7	0	0	0	0	0	0	2.57	2.65	1	1
41	2	78.8	168	27.9195	39	112	139	81	23	100	14	690	8.1	13.7	0.591241	2.8	149	4.1	8.4	95	0.6	0	0	0	0	1	1	1	0	0	1	1	47	34	1	0	0	1	0	1	1	14.74	9.99	0	0
61	1	128	168	45.3515	36.94	86	127	66	15	100	15.9	214	6.8	16	0.425	2.2	136	4.6	8	90	1.1	0	0	0	0	0	1	1	0	0	1	1	40	25	5	0	0	1	0	0	0	13.64	3.41	0	0
64	2	96.7	183	28.8752	37.44	102	164	99	22	94	11.1	176	16.4	14.4	1.13889	2.5	133	4.3	8.8	100	0.9	0	0	1	0	1	1	0	0	0	0	2	46	33	3	0	0	0	0	0	0	13.6	1.03	1	1
61	2	117	168	41.4541	36.11	69	121	67	24	93	13.1	147	14.8	15.4	0.961039	3.3	140	3.2	7.7	299	1.5	0	1	1	1	1	1	0	0	0	1	8	51	38	4	0	1	0	0	0	1	1.71	1.81	1	1
57	2	110	168	38.9739	39	94	140	87	19	93	9.5	180	12.1	13.8	0.876812	2.8	141	4.3	8.6	109	0.9	0	0	1	0	1	1	0	0	0	1	2	43	19	2	0	0	0	0	0	0	19.06	2.91	0	0
73	2	62	188	17.5419	36.56	86	126	61	19	93	7.7	345	8.6	15.9	0.540881	1.8	139	4.5	7.9	152	0.8	0	1	1	0	0	1	1	0	0	1	1	26	31	8	0	0	0	0	1	0	13.48	2.59	1	1
57	2	78.5	168	27.8132	36.94	75	162	100	20	97	8.1	223	14.9	11.9	1.2521	2.9	140	3.9	9.4	89	1	0	0	0	0	1	0	0	0	0	0	1	21	31	5	0	0	0	0	0	0	23.96	1.13	0	0
71	2	90.7	168	32.1358	37	121	142	91	21	95	3.8	210	13.7	17	0.805882	2.9	129	5.3	7.8	301	1	1	0	1	0	1	0	1	0	0	1	4	49	29	9	0	1	0	0	1	0	12.99	2.37	1	1
68	2	128.7	185	37.6041	36.67	89	NULL	NULL	13	100	5.7	124	13.3	13.8	0.963768	2.8	135	4.7	7.7	96	1.7	0	0	1	0	1	1	0	0	0	0	7	52	23	2	0	1	0	0	1	0	21.84	1.88	0	0
66	2	101.5	168	35.9623	37.67	98	135	77	17	100	12.5	191	9.9	14.2	0.697183	2.6	137	5.2	8.3	283	1.7	0	0	1	0	1	0	1	0	0	0	3	30	29	6	0	0	1	0	1	1	17.69	7.03	0	0
55	2	112.01666666666667	175	36.5769	34.39	89	110	70	20	90	15.4	266	11.8	15.9	0.742138	3.5	141	4.7	11.1	202	9.4	0	1	1	0	1	0	1	1	0	1	13	56	30	6	0	0	1	1	0	1	3.58	4.61	1	1
54	1	70.46666666666667	170	24.3829	35.28	91	148	79	16	100	10.8	104	10.7	14.7	0.727891	3.2	145	3.2	8.3	78	1.1	0	0	0	0	0	1	0	0	0	1	3	55	40	1	0	0	1	0	1	1	14.58	2.68	0	0
25	2	79.55	178	25.1073	36.78	44	100	57	14	100	8.5	212	14.8	12.7	1.16535	3.9	137	3.7	8.3	120	0.8	0	0	0	0	1	0	0	0	0	1	3	39	24	0	0	0	1	0	1	1	30.37	30.41	0	0
60	1	104	168	36.8481	37.28	98	108	52	11	99	9.9	250	11.1	14.8	0.75	2.8	142	4.6	7.8	144	1.1	0	0	1	0	0	1	1	0	0	0	1	35	23	5	0	1	0	0	0	0	4.7	3.87	0	0
73	1	83.3	163	31.3523	36.72	97	97	48	20	98	11.3	161	8.2	16.2	0.506173	2.8	144	3.9	8.8	131	0.7	0	0	0	0	0	1	1	1	0	0	2	45	42	5	0	0	0	0	1	1	7.86	4.01	0	0
57	1	76.8	168	27.2109	36.83	41	107	53	15	96	6.3	125	8.4	18.5	0.454054	2.8	140	4.4	9.8	135	5.4	1	0	0	0	0	0	1	1	0	1	8	47	26	5	0	1	0	0	1	0	2.88	1.87	0	0
74	2	106.5	180	32.8704	37.56	112	125	83	20	100	15.1	138	11.9	13.6	0.875	2.8	136	4.4	7.1	179	1	0	1	0	0	1	1	0	0	0	1	5	30	35	3	0	1	0	0	1	1	37.16	15.09	0	0
40	2	120	183	35.8327	36.94	85	99	49	26	100	32.9	207	12.4	16.2	0.765432	2.4	136	4.2	7.6	219	2.7	1	1	0	0	1	1	0	1	0	1	10	62	32	2	0	1	0	0	1	1	14.8	7.97	0	0
45	1	99.8	168	35.36	37.67	78	153	106	31	100	17.7	335	10.6	14.8	0.716216	2.8	138	4	8.2	120	0.4	0	0	0	0	0	0	0	0	0	1	0	16	29	0	0	1	1	0	1	1	8.63	2.79	0	0
65	2	84.75	165	31.1295	36.78	87	82	65	12	100	10.8	254	11.8	16.8	0.702381	3	141	3.7	9	125	0.7	0	1	1	1	0	0	0	1	0	1	3	29	32	6	0	0	0	0	1	1	16.48	9.06	0	1
52	2	99.8	173	33.3456	37.33	113	141	78	30	83	9.1	200	12.4	13.6	0.911765	3.7	135	3.6	8.6	128	0.9	0	0	0	0	1	0	0	0	0	1	2	64	27	1	0	1	0	1	1	1	23.44	23.51	1	1
60	2	81.1	170	28.0623	36.61	60	117	74	19	96	11.9	280	12.2	14.6	0.835616	3.4	138	3.8	8.4	102	0.6	0	0	0	0	0	1	0	0	0	1	0	22	24	2	0	0	1	0	1	0	7.44	7.39	0	0
34	2	61.6	170	21.3149	37.11	103	128	75	20	94	31.2	168	7.7	15.6	0.49359	1.6	139	4.3	6.6	117	1.3	0	0	0	0	1	0	0	0	0	1	4	80	47	1	0	0	0	0	0	1	19.66	19.66	0	0
56	2	92.21	178	29.103	36.44	123	108	65	23	85	27.5	54	11.9	13.2	0.901515	2.1	139	3.5	7.1	181	3.6	0	0	0	0	1	0	0	1	0	1	20	136	58	4	0	0	0	1	1	1	126.19	11.45	0	0
67	2	155	168	54.9178	36.5	96	133	87	20	97	6.5	269	13.6	13.1	1.03817	2.8	134	6.2	9.6	162	1	1	1	1	0	0	1	1	0	0	0	0	37	25	4	0	0	0	0	1	0	10.98	1.18	0	0
68	2	90.4	168	32.0295	37	62	128	73	14	97	7.5	259	9.8	13.2	0.742424	2.8	137	4	8.5	88	0.9	0	0	0	0	0	1	0	0	0	0	1	33	21	4	0	1	1	0	1	0	8.79	2	0	0
70	1	81.65	145	38.8347	36.83	94	107	62	18	95	13.5	252	12.4	13.9	0.892086	2.8	139	3.8	8.1	88	0.6	1	0	0	0	0	1	0	1	0	1	9	55	51	5	0	1	1	0	1	1	5.95	3.1	0	0
52	1	77	165	28.2828	37.78	109	133	78	34	100	13.7	198	8.2	14.1	0.58156	1.9	138	3.9	7.3	84	0.8	0	0	0	0	0	1	0	0	0	1	0	30	36	1	0	0	0	0	1	0	22.8	10.99	0	0
65	2	91.8	168	32.5255	36.61	65	117	72	23	99	7	100	14.4	12.3	1.17073	2.8	142	4.1	8.9	93	0.7	0	1	0	0	1	1	0	0	0	1	2	17	26	6	0	0	1	0	0	0	3.2	3.07	0	0
59	2	141	168	49.9575	37.11	76	82	54	22	100	6.4	419	7.7	18.7	0.411765	3.4	135	4.4	9	72	3.1	0	1	0	1	1	0	1	1	0	1	5	36	25	6	0	1	0	0	1	0	16.22	1.13	1	1
60	1	120.8	168	42.8005	36.56	119	121	78	49	93	18	196	10.7	16.4	0.652439	2.8	144	4.2	9	135	1	0	0	0	0	1	1	0	0	0	1	3	40	28	4	0	1	1	0	1	0	11.21	3.31	0	0
79	1	38	157	15.4164	38.89	105	85	54	16	100	16.2	145	9.3	16	0.58125	2.9	144	3.4	7.7	100	0.6	0	0	0	0	1	1	0	0	0	0	9	20	39	4	0	0	0	0	0	0	22.1	2.11	0	0
25	1	68.55000000000001	168	24.2878	36.83	82	97	62	23	100	14.4	218	12.6	13.4	0.940299	2.8	139	4.4	8.3	83	0.6	0	0	0	0	0	0	0	0	0	0	1	24	20	0	0	0	0	0	1	0	4.9	4.26	0	0
47	1	48.7	168	17.2548	38.61	105	96	56	19	95	5.6	69	8.9	17.1	0.520468	3	135	3.7	7.3	94	0.5	1	0	1	0	1	0	0	0	0	0	4	34	24	1	0	0	0	0	0	0	19.85	2.97	0	0
75	1	57.5	142	28.5162	36.39	105	124	53	15	100	11.7	527	9.7	16.2	0.598765	2.8	138	3.9	8.4	129	0.8	0	0	0	0	1	1	0	0	0	1	4	52	35	5	0	0	0	0	1	0	26	3.15	0	1
50	2	136.2	168	48.2568	37.06	105	142	83	22	76	29.1	154	15.6	19.2	0.8125	3.1	128	5.4	7.5	119	2.1	0	0	1	0	1	0	0	1	0	1	12	78	26	6	0	0	0	0	1	1	37.74	22.89	0	0
38	1	110.4	157	44.7888	37.06	130	105	62	20	90	14.1	235	10.2	19.3	0.528497	1.9	136	4.3	6.7	101	1.3	0	0	1	0	1	0	0	0	0	1	15	110	48	3	0	1	0	0	1	1	20.82	13.74	0	0
63	2	61	183	18.2149	36.44	108	106	70	25	94	7.2	165	12	15.2	0.789474	2.8	140	4.1	8.2	84	0.6	0	0	0	0	0	0	0	0	0	0	1	43	33	8	0	0	1	0	1	0	5.89	1.59	0	1
25	1	60	168	21.2585	36.39	86	97	52	34	99	24.5	162	9	13.3	0.676692	1.8	135	3.9	7.5	82	0.5	1	0	0	0	0	0	0	0	0	0	1	35	23	2	0	0	0	0	0	0	42.98	1.23	0	0
52	1	77.3	168	27.388	36.28	80	125	77	20	98	14.5	380	12.7	12.2	1.04098	3.7	135	4.9	9.1	311	0.8	0	0	0	0	0	0	0	0	0	0	4	42	26	1	0	0	1	0	1	1	2.84	1.42	0	0
57	1	90.9	168	32.2066	36.39	87	109	52	26	100	23.5	432	7.8	20	0.39	2.8	131	4.5	7.6	190	1.3	0	0	0	0	1	1	1	0	0	1	6	61	27	10	0	0	0	0	0	0	7.89	3.64	0	0
64	2	156	191	42.762	36.67	98	137	81	24	99	10.3	258	12.7	13.8	0.92029	2.8	141	3.9	8.5	98	0.8	0	0	0	0	0	1	0	0	0	1	1	33	23	2	0	0	0	0	1	0	5.49	1.27	0	0
79	1	96.4	168	34.1553	36.39	64	133	62	27	90	6.8	259	13.2	15.4	0.857143	3	142	4.3	8.8	144	1.1	1	0	1	1	1	0	1	0	0	1	0	19	20	10	0	0	1	0	1	0	11.28	2.8	1	1
50	2	205.4	168	72.7749	36.72	93	102	73	15	96	18.7	332	6.6	21.7	0.304147	2.8	142	4.2	8.2	123	1.3	0	0	0	0	0	1	0	0	0	1	3	38	25	3	0	0	0	0	0	0	9.93	2.08	0	0
53	1	92.15	160	35.9961	36.5	69	125	67	11	100	12.8	164	10.6	14.3	0.741259	2.8	139	3.7	7.8	117	0.9	0	0	0	0	1	1	0	0	0	1	1	19	22	1	0	0	1	0	1	1	5.41	1.27	0	0
41	1	104.5	157	42.3952	36.5	76	158	128	21	93	6.2	192	12.1	13.1	0.923664	2.9	142	3.2	7.4	208	0.8	0	0	0	0	1	0	0	0	0	1	4	53	31	0	0	0	0	0	1	1	17.73	10.88	0	0
74	2	75	168	26.5731	36.28	76	174	154	15	100	0.4	167	7.5	21.5	0.348837	3.1	141	3.5	7.8	133	0.8	0	0	0	0	1	1	0	0	0	1	4	73	29	5	0	1	0	0	0	0	50.94	5.03	0	0
67	1	51.9	168	18.3886	37	99	101	57	15	97	4	79	9.2	14.3	0.643357	2	135	4	8	128	0.5	0	0	1	0	1	0	0	0	0	0	4	40	26	3	0	0	0	0	0	0	16.42	2.52	0	0
41	1	104	168	36.8481	36.33	99	123	79	25	100	11.5	221	12.2	13.9	0.877698	3.6	141	4	8.3	157	0.7	0	0	0	0	1	0	0	0	0	1	1	41	39	1	0	0	0	0	1	1	20.42	7.56	0	0
55	1	74.7	168	26.4668	36.56	68	104	46	20	94	11	159	12.2	14.2	0.859155	2.8	142	4.2	8.8	152	0.7	1	1	1	0	0	1	0	0	0	1	3	38	33	3	0	0	1	0	1	0	5.1	2.02	0	0
73	1	74.44999999999999	168	26.3783	36.78	101	78	62	28	99	12.3	313	9.7	18.4	0.527174	2.5	139	3.4	7.4	131	0.6	1	0	0	0	1	1	0	1	0	1	7	40	41	5	0	0	0	0	0	0	10.08	1.95	0	0
43	2	148	188	41.8742	35.83	94	114	63	14	99	15	182	9.6	15.4	0.623377	2.8	140	4.1	7.7	147	0.8	0	0	0	0	0	0	0	0	0	1	1	32	33	0	0	0	0	0	1	0	14.26	3.32	0	0
30	1	81.5	168	28.8761	36.83	126	109	84	21	98	7.4	193	12.3	12.8	0.960938	2.8	140	4.3	8.4	97	0.6	0	0	0	1	0	0	0	0	0	1	1	28	26	0	0	0	1	0	1	0	4.05	1.99	0	0
26	1	59.2	168	20.9751	36.22	90	91	63	32	98	5.7	7	8.5	17.1	0.497076	2.8	135	4.2	7.2	144	0.5	0	0	0	0	1	0	0	1	0	1	9	56	33	1	0	0	1	0	1	0	4.3	4.55	1	1
68	2	67.1	180	20.7099	36.72	109	135	40	33	80	13.1	213	11.6	16.1	0.720497	3.3	126	4.6	8.1	117	0.9	1	1	0	0	1	1	0	1	0	1	2	44	28	7	0	1	0	0	1	0	15.67	3.01	0	0
56	1	72	168	25.5102	36.72	101	110	60	16	100	20.9	271	8.8	14.8	0.594595	2.8	133	3.9	7.8	373	1.2	0	0	1	0	1	0	1	0	0	0	5	27	17	12	0	1	0	0	0	0	3.44	1.77	0	0
76	2	79.5	173	26.5629	37.06	91	97	63	14	96	9.5	135	9.9	13.8	0.717391	2.8	141	3.6	7.8	113	1	0	1	0	0	1	1	0	0	0	1	9	70	38	5	0	1	0	0	1	1	8.06	4.92	0	0
66	2	102.2	180	31.5432	36.44	126	159	95	27	96	7.7	514	9.5	17.7	0.536723	3	141	3.7	8.9	83	0.6	0	1	0	0	1	1	1	0	0	1	6	45	40	3	0	1	0	0	1	1	15.83	4.85	0	0
29	2	345	178	108.888	38.61	86	112	43	24	91	9.4	300	13.9	15.3	0.908497	3	143	4.3	8.2	124	0.7	0	0	0	0	0	0	0	1	0	1	2	12	12	1	0	1	0	0	0	1	31.92	32.01	0	1
23	2	96	168	34.0136	36.78	121	131	81	14	99	12	100	10	11	0.909091	2.6	161	4.2	9.4	501	2.6	0	0	0	0	0	0	1	0	0	0	4	53	15	1	0	1	0	0	0	0	9.16	3.91	0	0
28	2	99	170	34.2561	38	151	82	44	21	96	0.6	101	7.9	18.3	0.431694	1.6	143	3.1	4.6	147	0.7	0	0	0	0	1	0	0	0	0	1	12	94	43	3	0	0	0	0	1	1	73.85	4.25	0	1
77	2	102.7	168	36.3875	36.94	99	82	49	16	100	12.8	246	10.9	16.3	0.668712	2.8	131	4	8.5	213	1	0	1	0	0	1	1	0	0	0	1	4	51	26	5	0	1	0	0	1	0	13.55	2.97	0	0
60	1	107.6	168	38.1236	35.67	76	139	104	26	99	8.5	416	7.8	19.1	0.408377	2.8	133	4.9	9.4	76	1.9	0	1	0	0	0	0	0	1	0	1	4	50	32	3	0	1	1	0	0	0	16.93	1.64	0	0
70	2	76.9	168	27.2463	37.44	119	131	77	30	94	30.7	327	12.7	12.3	1.03252	2.2	132	3.9	8.4	137	1.3	0	0	0	0	0	0	0	0	0	1	2	35	29	3	0	0	0	0	1	0	13.95	3.97	0	0
36	1	149	168	52.792	36.94	101	102	87	21	95	6.7	257	9.7	15.1	0.642384	3.5	140	3.5	8.7	134	0.7	0	0	0	0	0	0	0	0	0	1	0	14	24	2	0	1	0	0	0	0	4.98	1.17	0	0
69	1	74.2	168	26.2897	37	80	126	78	14	99	11.5	241	13.9	13.9	1	2.8	141	3.8	9.1	102	0.8	0	0	1	0	0	0	0	0	1	1	5	50	44	6	0	0	0	0	1	0	23.72	2.9	0	0
63	1	86	168	30.4705	36.67	76	144	83	19	98	8.5	80	8.6	20.2	0.425743	2.6	137	3.9	8.2	219	0.9	0	0	1	0	1	0	1	0	0	1	3	32	26	6	0	0	0	0	0	0	58.8	1.69	0	1
54	2	70.2	168	24.8724	37.5	131	131	89	25	94	3.1	125	8.7	15.9	0.54717	3	133	3.9	7.6	112	0.9	0	0	0	0	1	1	0	0	0	0	2	38	33	2	0	0	1	0	1	0	3.57	1.72	0	0
49	1	82.19999999999999	165	30.1928	37.17	54	143	65	17	96	11.3	542	8.1	26.6	0.304511	2.8	140	4.4	8.2	154	1	0	0	0	0	1	1	0	0	0	0	2	19	14	0	0	0	0	0	1	0	11.38	3.33	0	0
54	2	98.1	168	34.7577	37.5	97	127	67	17	93	14	158	8.5	15.5	0.548387	2.4	138	5.6	7.5	166	6.2	0	0	0	0	1	0	1	1	0	1	9	42	24	7	0	0	0	1	1	0	13.78	3.01	0	0
46	2	157.5	198	40.1745	37.78	88	157	88	18	89	11.9	346	11.1	13.2	0.840909	2.8	138	3.9	8.7	92	1.2	0	0	0	0	0	0	1	0	0	1	1	16	14	2	0	0	0	0	1	0	8.93	1.93	0	0
55	1	86.66666666666667	168	30.7067	36.61	73	92	52	14	95	8.5	304	10.7	13.4	0.798507	3.2	140	4.3	8.5	113	0.6	0	0	0	0	0	0	0	0	0	0	1	26	19	4	0	0	0	0	1	0	5.61	1.31	0	0
47	1	99.4	168	35.2183	36.61	124	132	88	30	96	17	344	7.4	18.7	0.395722	2.8	137	4.7	8.6	305	0.7	1	0	0	0	0	1	1	1	0	1	2	32	24	3	0	1	0	0	1	0	5.47	1.59	0	0
63	1	69.7	168	24.6953	37.17	88	107	73	19	95	8	282	13.2	13.7	0.963504	2.8	142	3.5	9	116	1	0	0	1	0	0	0	1	0	0	0	4	39	26	5	0	1	1	0	0	0	6.19	3.04	0	0
62	1	60	168	21.2585	35.44	97	134	73	29	95	13.2	280	13.3	14	0.95	2.8	138	4.6	8.5	183	0.6	0	0	0	0	0	1	1	0	0	1	1	29	38	5	0	1	0	0	0	0	15.67	2.71	0	0
58	2	64.5	168	22.8529	37.44	140	129	64	48	97	8.8	25	12.5	15.4	0.811688	1.8	132	4	7.8	104	1.3	0	0	1	0	1	1	0	0	0	1	11	97	49	2	0	0	1	0	1	1	38.38	13.63	0	0
55	1	55.25	168	19.5755	37.28	81	105	73	19	97	9.1	144	12.3	15.2	0.809211	2.7	140	3.2	7.7	99	0.5	1	0	1	0	1	0	0	0	0	0	4	30	30	2	0	0	0	0	1	1	10.18	2.1	0	0
67	2	81.7	168	28.947	36.61	112	93	66	25	93	28.3	183	10.9	17.4	0.626437	2	129	9.7	6.1	113	11.3	1	0	1	0	1	0	0	0	0	1	13	79	30	5	0	0	1	0	0	0	7	5.08	1	1
69	2	66.55	178	21.0043	36.33	85	95	62	16	100	10.4	100	9.6	12.2	0.786885	2.8	134	5	8.1	124	1.1	1	0	0	1	0	0	0	1	1	1	7	30	28	6	0	0	0	0	1	0	6.88	1.2	0	0
72	1	107	165	39.3021	37.11	85	122	62	12	93	21	132	9	13.3	0.676692	2.7	137	5.4	8.3	152	0.8	0	1	0	1	1	0	0	1	1	1	8	49	31	6	0	1	0	0	1	1	17.34	11.03	0	0
76	1	119.8	168	42.4461	37.72	130	137	73	21	98	25.9	191	6.8	15.1	0.450331	2.3	136	3.9	7.1	145	0.8	0	0	0	0	1	0	0	0	0	1	9	80	54	5	0	1	1	0	0	1	38.97	2.96	0	1
56	2	82	173	27.3982	36.39	80	123	77	18	100	18.3	194	8.2	13	0.630769	2.8	141	4.5	8.5	140	1	0	1	0	0	0	0	1	1	0	1	6	44	27	4	0	0	0	0	1	1	6.39	3.41	0	0
56	2	79.7	168	28.2384	37.39	104	142	92	20	97	3.6	313	14.5	13.5	1.07407	3.4	139	4.3	8.9	115	0.9	0	0	0	0	0	0	0	0	0	1	0	20	26	1	0	1	1	0	1	0	8.74	1.06	0	0
76	2	61.26666666666667	168	21.7073	37.56	57	122	55	21	94	14.3	129	11.6	15	0.773333	3	143	4	8.4	116	0.9	0	1	0	0	1	0	0	1	1	0	3	32	27	6	0	0	0	0	0	0	9.32	1.29	0	0
73	1	105.7	168	37.4504	36.78	81	94	47	14	97	6.2	120	9.4	14.2	0.661972	3.9	114	4.8	8.3	87	1.7	0	1	1	0	1	0	0	1	0	1	5	60	21	11	0	0	0	1	1	1	34.96	14.99	0	1
63	2	76.2	180	23.5185	36.83	90	114	65	19	93	8.5	192	10.2	13.7	0.744526	2.9	138	3.9	7.8	106	0.6	0	0	1	0	0	0	0	0	0	0	1	28	20	3	0	0	0	0	1	0	8.64	2.32	0	0
75	1	62	168	21.9671	36.78	82	148	70	15	100	14.5	190	12.7	13	0.976923	2.8	138	4.7	9.5	137	0.8	0	0	0	0	0	1	0	0	0	1	4	38	33	6	0	0	0	0	1	0	5.83	3.89	0	0
63	2	78	168	27.6361	37.11	79	150	99	19	93	9.1	114	12.1	15.2	0.796053	2.8	118	4	8.4	73	1.1	0	0	1	0	0	1	0	0	0	1	3	33	21	5	0	0	1	0	1	0	8.58	4.17	0	0
59	1	75.6	168	26.7857	37.83	108	92	60	19	96	19	214	7	16.5	0.424242	2.8	141	4	7.4	130	0.5	0	0	0	0	0	0	0	0	0	0	1	40	22	2	0	0	0	0	1	0	28.84	1.84	0	0
58	2	66.3	173	22.1524	36.61	55	117	60	23	99	11.9	72	11.3	14.5	0.77931	2.9	138	3.8	8.8	126	0.6	1	0	0	1	1	0	0	0	0	1	6	62	36	1	0	1	1	0	1	1	13.13	13.26	1	1
58	2	78.7	175	25.698	36.94	95	106	76	20	100	8.2	83	9.8	19.2	0.510417	2.6	132	5.2	8.1	134	5	0	1	0	0	1	0	1	1	0	1	10	64	36	9	0	0	0	0	1	1	10.45	10.46	1	1
55	2	105	183	31.3536	37.22	86	122	78	11	99	3.5	117	11.8	16.9	0.698225	2.8	143	4.3	9.3	99	1.2	0	0	0	0	1	1	1	0	0	1	3	23	22	4	0	0	0	0	1	0	15.86	5.93	0	0
55	2	78.9	168	27.9549	36.61	93	94	66	16	95	8.9	49	13	13.6	0.955882	2.2	133	3.5	7.6	131	1	0	0	0	0	1	1	0	0	0	0	5	34	21	1	0	0	0	0	0	0	18.94	2.29	0	0
70	2	114	178	35.9803	36.39	80	107	66	17	92	8.8	104	9.8	13.2	0.742424	2.8	135	4.6	7.6	139	1.2	0	0	0	0	0	0	0	1	0	1	10	35	33	4	0	1	1	0	1	1	5.58	1.19	0	0
57	1	83	157	33.6728	36.5	86	113	67	12	100	7.1	182	8.8	12.9	0.682171	2.8	140	4.1	7.6	100	0.6	0	0	1	0	1	0	0	0	0	1	3	29	22	2	0	0	0	0	1	0	7.17	4.32	0	0
34	1	60	170	20.7612	39.39	101	84	69	26	91	9	54	11.4	15.5	0.735484	1.9	134	2.8	7	130	0.6	0	0	0	1	1	0	0	0	0	0	9	95	44	1	0	0	0	0	1	1	14.75	8.68	0	0
42	2	90.4	193	24.2691	36.83	89	117	78	22	95	27.4	91	9.4	15	0.626667	2.8	137	4.5	7.7	104	0.9	1	0	0	0	1	1	0	1	0	1	4	44	29	4	0	1	0	0	0	0	6.86	2.19	1	1
67	2	80.5	168	28.5218	36.56	140	116	71	37	94	5.4	197	10.1	13.4	0.753731	2.8	142	3.9	9.1	120	0.7	1	1	1	0	0	1	0	0	0	1	0	31	28	2	0	1	0	0	0	0	8.43	3.01	0	0
63	2	100	188	28.2933	37.67	60	133	57	21	100	10.2	123	13.1	13.5	0.97037	2.8	139	4.1	8.5	161	0.9	0	1	0	0	1	1	0	0	0	1	8	47	44	2	0	0	1	0	1	1	19.98	8.09	0	0
59	2	102.7	168	36.3875	36.89	112	128	84	16	96	5.7	42	10.6	20.3	0.522167	3.9	137	4.2	8.6	229	0.8	0	1	0	0	0	0	1	0	0	1	5	33	28	3	0	1	0	0	0	0	31.68	1.97	0	0
69	2	67.5	173	22.5534	37.11	117	132	117	24	95	18.7	591	8.1	15.9	0.509434	2.1	133	4.2	10.2	76	0.6	0	0	0	0	1	1	1	0	0	1	8	45	37	5	0	1	0	0	0	1	7.18	6.4	1	1
47	1	51.3	168	18.176	36.78	93	103	71	17	80	2.5	114	10.4	16	0.65	3	143	3.6	7.6	95	0.5	0	0	0	0	0	0	0	0	0	0	2	30	20	1	0	0	0	0	0	0	24.18	3.8	0	0
30	1	89.3	168	31.6397	36.78	104	129	107	14	98	13.9	171	11.3	14	0.807143	2.8	142	4.4	8	135	0.8	1	0	0	0	0	0	0	0	0	1	4	39	36	1	0	0	0	0	0	1	3.54	1.66	0	0
33	1	57	168	20.1956	37	139	156	116	15	98	21.2	240	7.6	16.3	0.466258	2.2	131	3.3	7.8	88	2.8	1	0	0	0	0	0	0	0	0	0	6	71	36	0	0	1	0	0	0	0	2.72	2.71	0	0
58	2	117.9	175	38.498	36.83	107	114	81	25	100	16.7	250	10.3	14.6	0.705479	3.2	138	3.3	8.4	113	0.8	1	0	1	0	0	0	0	0	0	1	3	14	31	2	0	0	1	0	0	1	5.41	2.18	0	0
79	2	63	178	19.8839	35.44	99	107	60	24	100	3.1	80	8.3	20.7	0.400966	1.7	150	3.3	7.4	15	2.1	0	0	1	0	1	0	0	0	0	1	14	99	41	11	0	1	0	0	0	1	7.7	1.83	1	1
63	2	76.6	168	27.14	36.83	79	111	68	28	95	5.7	250	11.8	15.5	0.76129	2.8	140	3.5	8.1	168	0.9	0	0	0	0	0	0	0	0	0	1	1	29	33	6	0	0	0	0	1	0	8.57	1.64	0	0
58	1	119.4	170	41.3149	36.89	75	141	72	18	97	8.6	329	10.3	19.1	0.539267	2.6	141	3.6	8.5	211	0.7	0	0	0	0	0	0	0	0	0	1	0	23	22	1	0	0	0	0	1	0	8.54	1.69	0	0
67	1	53.5	168	18.9555	36.39	79	110	50	26	93	20.7	248	11.6	14	0.828571	3	141	4.2	8.6	105	0.5	0	1	0	0	1	1	0	1	0	0	2	31	28	3	0	0	0	0	1	0	7.89	2.88	0	0
35	2	95.2	178	30.0467	37.56	101	128	79	17	100	9.9	384	7.8	14.2	0.549296	2.4	142	3.8	8.5	95	1.2	0	0	0	0	1	0	0	0	0	1	6	43	35	0	0	1	0	0	1	1	7.71	4.67	0	0
26	1	65	165	23.8751	36.83	98	93	43	25	100	17	253	8.5	15.2	0.559211	1.8	140	3.5	6.8	105	0.9	0	0	0	0	1	0	0	0	0	0	5	72	37	0	0	0	1	0	1	0	15.6	10.74	0	0
47	2	97.4	178	30.7411	36.33	80	103	61	22	97	23.6	163	9.5	18.6	0.510753	2.8	144	4.5	8.3	142	1	0	0	0	0	1	0	0	0	0	0	4	21	22	0	0	0	0	0	0	0	2.5	1.15	0	0
31	2	67.8	173	22.6536	35.83	88	98	61	20	100	13.9	200	9.8	13.7	0.715328	2.8	136	4.2	7.4	100	0.7	1	0	0	0	1	0	0	0	0	1	4	45	23	2	0	0	0	0	1	0	10.77	8	0	0
58	2	124.89999999999999	168	44.2531	38.33	129	143	73	29	96	10.4	297	11.4	13.9	0.820144	3	137	2.9	8.4	209	0.7	0	0	0	0	1	1	1	1	0	1	4	39	37	4	0	0	0	0	1	1	30.24	13.36	0	0
70	1	91.4	168	32.3838	37.78	83	118	57	25	86	6.8	220	11	15.8	0.696203	3.3	143	4.8	9	150	2.2	1	0	0	0	1	1	1	0	0	1	4	46	28	5	0	0	1	0	1	1	23.99	8.89	0	0
67	1	119.2	160	46.5625	36.72	73	125	73	13	100	17.4	393	9.7	14.7	0.659864	2.8	145	3.5	8.1	51	0.3	1	0	0	0	1	0	1	0	0	1	6	37	33	5	0	0	0	0	1	1	17.67	5.97	0	0
46	1	97.4	170	33.7024	36.39	70	112	55	16	100	3.4	272	13.1	11	1.19091	2.4	137	3.2	7.6	116	0.7	0	0	0	0	1	0	0	1	0	1	5	43	36	2	0	1	0	0	1	0	10.69	3.46	0	0
51	1	80.8	170	27.9585	35.78	111	100	66	23	97	23.1	119	10.5	15.4	0.681818	2.8	135	4	7.3	103	0.9	1	0	0	1	1	1	0	1	0	1	5	54	32	3	0	0	1	0	1	0	8.88	4.64	0	0
29	1	50	155	20.8117	36.44	151	116	72	16	100	8.9	52	5.1	13.8	0.369565	2	139	3.5	8	256	0.6	0	0	0	0	1	0	0	0	0	1	18	113	51	3	0	0	0	0	1	1	47.82	21.8	0	0
29	2	110.2	168	39.0448	36.33	123	139	97	20	92	15.9	20	13.6	13	1.04615	3.8	134	4.4	8	139	1.2	0	0	1	0	1	1	0	1	0	1	5	53	33	2	0	0	0	0	1	0	13.85	8.98	0	0
57	1	69.43333333333334	157	28.1688	37.39	115	121	85	23	93	8.9	344	8.5	11	0.772727	2.8	125	3.6	7.9	234	2.5	0	0	1	0	0	0	1	1	1	1	7	82	27	7	0	1	0	0	1	1	4.18	4.18	1	1
28	2	98	183	29.2633	37.11	81	107	64	16	99	14.1	312	14.9	12.5	1.192	3.4	131	6.6	6.5	174	1.9	1	1	0	0	1	0	0	0	0	1	8	43	27	1	0	1	1	1	1	1	14.6	4.13	0	0
79	1	61.7	160	24.1016	35.11	166	129	70	24	100	7.2	182	9.5	15.9	0.597484	2.8	141	3.2	7.7	155	0.3	0	1	0	0	0	0	0	0	0	0	4	60	34	3	0	0	0	0	1	0	14.99	1.07	0	0
61	2	170	183	50.7629	38.67	90	101	46	12	94	39.7	201	7.6	16.9	0.449704	1.7	136	3.9	6.4	236	0.8	0	1	0	0	1	1	0	0	0	1	12	94	42	2	0	1	0	0	1	1	57.82	8.82	0	0
36	2	78.15	183	23.336	36.67	130	122	64	12	100	11.3	201	7.1	15.5	0.458065	2.9	134	4.7	9.1	97	6.8	0	0	0	0	1	0	0	0	0	0	5	52	35	2	0	0	0	0	1	1	17.25	1.31	0	0
49	1	104.5	168	37.0252	37.56	102	111	61	14	96	17	240	12.4	14.7	0.843537	2.8	137	4	8.3	135	0.8	1	0	1	0	0	1	0	0	0	1	2	28	20	1	0	1	0	0	1	0	6.38	2.17	0	0
70	2	107.5	183	32.1001	37.11	91	121	76	24	95	6.2	453	10.4	19.1	0.544503	2.8	134	4.2	8.1	106	0.9	0	0	1	0	0	1	0	0	0	1	4	38	38	5	0	1	0	0	1	1	12.77	4.75	0	0
68	2	92	160	35.9375	36.83	79	121	87	30	96	6.6	47	11.6	12.3	0.943089	2.7	134	4.6	7.9	247	0.9	0	1	0	0	1	0	0	0	0	1	12	77	38	2	0	0	0	1	0	0	16.83	16.92	1	1
61	2	78.2	183	23.351	36.94	104	112	57	33	94	32.7	134	14.5	12.4	1.16935	2.2	133	4.8	7.8	124	1	0	0	0	0	1	0	0	0	0	1	8	78	40	2	0	0	0	0	0	1	6.86	6.98	1	1
30	1	102.2	168	36.2103	37.78	85	126	91	30	97	5.8	251	9	22.8	0.394737	3.5	136	3.7	9	102	0.7	0	0	0	0	0	0	0	0	0	1	1	22	26	0	0	1	0	0	1	0	13.19	3.03	0	0
24	2	80.7	168	28.5927	37.78	117	123	79	26	96	16.3	419	9.3	15.3	0.607843	3.4	143	3.8	8.8	99	0.7	0	0	0	0	0	0	0	0	0	0	0	22	19	1	0	0	0	0	0	0	13.65	1.6	0	0
55	1	144	168	51.0204	37.67	76	155	82	23	95	10.8	274	7.7	15.5	0.496774	2.8	134	3.3	8.7	200	4.8	0	0	0	1	0	0	1	1	0	0	5	51	23	12	0	0	0	0	1	0	32.59	2.04	0	0
73	2	90.7	178	28.6264	37.33	89	100	63	29	97	9.2	259	9.2	16.1	0.571429	2.8	143	3.6	8.6	112	0.7	0	1	0	0	1	1	1	0	0	1	9	58	46	7	0	0	0	0	0	1	29.96	9.59	0	0
62	2	92.7	173	30.9733	38.72	132	108	64	33	91	34.5	268	14.8	12.6	1.1746	2.9	135	5	8.6	325	3.1	0	1	0	0	1	0	1	0	0	1	7	82	50	3	0	1	0	1	0	1	20.8	20.85	1	1
71	2	179.3	168	63.5275	36.67	70	115	60	30	94	13.7	221	11.4	16.5	0.690909	3.5	141	3.8	9.4	207	0.9	0	0	1	0	0	1	1	1	0	1	1	21	15	7	0	0	0	0	1	0	4.69	1.06	0	0
39	2	148	185	43.2432	37.06	92	NULL	NULL	20	100	18.4	186	13.4	14.8	0.905405	2.8	136	4.5	7.4	249	1.3	0	0	0	0	1	0	0	0	0	1	6	44	26	1	0	0	0	0	0	1	4.73	4.75	0	0
55	1	91	168	32.2421	37.06	94	74	51	17	100	9.9	293	9.7	14.9	0.651007	2.8	141	4.5	9	202	1.3	0	0	1	0	0	1	1	0	0	1	2	29	33	4	0	0	1	0	1	1	10.36	1.71	0	0
45	2	180.13333333333333	191	49.3773	36.61	92	144	109	37	98	13.2	130	15.5	21.1	0.734597	3.4	135	5.1	8.5	94	1.3	1	0	0	1	1	0	0	1	0	1	8	46	33	1	0	1	1	0	1	0	14.09	14.06	1	1
65	1	60	168	21.2585	36.39	83	94	73	20	96	13	204	13.8	13.2	1.04545	3.5	139	4.1	8.5	88	0.8	0	0	0	1	0	0	0	1	0	0	1	41	36	4	0	1	0	0	1	0	26.93	5.14	0	0
33	1	55.4	157	22.4756	36.5	97	103	68	25	93	14.1	49	8.4	20.7	0.405797	1.8	144	5.2	8.4	118	2.1	0	0	0	0	1	0	0	0	0	1	17	84	47	0	0	1	1	1	0	1	2.04	2.12	1	1
54	1	70.5	168	24.9787	36.72	72	100	64	14	100	9.1	281	11.4	14.5	0.786207	3.7	139	4.8	8.9	96	0.7	0	0	0	0	0	0	0	0	0	1	3	30	24	4	0	1	0	0	0	0	7.26	7.26	0	0
70	1	117	168	41.4541	36.67	80	160	79	20	94	22.9	177	11.7	16	0.73125	3.9	143	4.2	8.9	133	1.4	0	0	0	0	1	1	0	1	0	1	5	38	28	5	0	0	1	0	1	0	5.96	1.18	0	0
79	2	81.65	168	28.9293	36.78	81	116	58	16	100	3	76	7.5	15.3	0.490196	2.8	140	4.8	8.5	60	1.5	0	0	0	1	0	0	0	0	0	1	7	58	33	8	0	1	1	0	0	1	10.84	3	0	0
43	1	61.5	168	21.79	36.83	102	111	68	23	100	17.2	132	8.5	14.9	0.57047	4.1	140	3.9	8.6	102	1	0	0	1	0	0	0	0	0	0	0	5	44	28	6	0	1	0	0	0	0	4.81	1.93	0	0
64	2	124.8	188	35.3101	37.56	100	110	58	29	92	10.8	297	8.5	18.3	0.464481	2.1	135	3.8	7.2	66	0.8	1	0	0	0	1	1	1	0	0	1	8	67	39	5	0	1	0	0	1	1	30.08	16.24	0	0
78	1	63.5	160	24.8047	36.22	68	92	50	15	78	14.3	316	9.1	14.8	0.614865	1.7	132	3.5	8	86	1.3	1	1	1	0	1	1	1	1	0	1	3	40	33	7	0	1	0	0	1	1	25.94	6.39	0	0
69	2	93.3	178	29.447	NULL	65	112	54	12	100	7.6	56	8.1	13	0.623077	2.8	138	4.7	8.5	105	1.3	0	0	0	0	0	0	1	0	1	1	4	27	28	7	0	0	0	0	1	1	8.95	1.26	0	0
44	2	137.6	196	35.8184	36.78	107	163	106	20	97	6.5	141	12.7	14.7	0.863946	2.8	135	4.2	7.7	77	1	0	1	0	0	0	1	0	0	0	0	3	33	18	1	0	1	1	0	0	0	2.45	1.49	0	0
57	2	92.86666666666667	180	28.6626	36.67	95	113	67	32	92	6.1	66	10	19.5	0.512821	2.9	126	4	8	369	0.8	0	0	0	0	1	0	0	0	0	1	6	60	32	3	0	0	0	0	1	1	36.94	31.92	0	1
26	1	60	168	21.2585	39.39	128	128	52	40	96	11.3	110	9.6	12.9	0.744186	2.3	140	3	7.2	101	0.4	1	0	0	0	1	0	0	0	0	0	5	64	37	1	0	0	0	0	1	0	20.77	5.06	0	0
78	2	98.4	185	28.7509	36.72	71	118	63	18	97	10.9	193	14.9	12.8	1.16406	3.9	133	4	9.1	119	0.7	0	1	0	0	1	1	0	0	0	1	3	27	30	7	0	1	0	0	1	1	29.11	23.98	0	0
67	2	92	168	32.5964	36.61	97	102	60	16	93	7.4	197	10.1	13.2	0.765152	2.8	141	3.5	7.9	119	1	0	1	0	0	0	1	1	0	0	1	3	27	22	5	0	1	0	0	1	0	8.69	1.91	0	0
58	2	68.3	168	24.1993	38.28	132	132	71	29	92	6	269	8	14.5	0.551724	2.8	137	3.4	6.8	323	0.7	0	0	0	0	1	0	0	0	0	0	2	52	35	4	0	0	0	0	1	0	11.92	1.71	0	0
36	1	149	168	52.792	37.11	113	113	75	28	96	8.1	383	13.2	14.4	0.916667	3	133	5.4	8.5	348	1.2	0	0	0	0	1	1	1	0	1	1	8	72	40	3	0	1	1	0	1	1	24.9	12.15	0	0
44	1	141.5	157	57.406	36.72	148	152	125	18	100	71.7	474	8.7	21.5	0.404651	2	136	4.1	8.1	127	1.2	0	0	0	0	0	1	0	0	0	1	5	53	36	1	0	0	0	0	1	1	22.92	1.89	0	1
54	1	59.65	168	21.1345	35.83	112	84	49	23	83	6	106	10.4	15.8	0.658228	2.8	137	4.3	8.2	140	0.7	0	0	1	0	0	0	0	0	0	1	3	53	41	4	0	0	0	0	1	0	3.56	1.14	1	1
52	2	84	170	29.0657	36.72	91	130	98	16	95	10.2	163	14.2	20.2	0.70297	3.3	143	3.4	8.2	74	0.7	1	0	0	0	0	0	0	0	0	1	3	23	28	1	0	1	1	0	1	0	3.34	2.29	0	0
58	2	77.1	168	27.3172	37.11	82	107	59	15	94	3.3	67	7.6	19.9	0.38191	2.5	140	4.5	7.3	140	1	0	0	1	0	1	0	0	1	0	1	6	30	25	5	0	0	1	0	0	0	5.28	1.07	0	0
52	2	73.94999999999999	175	24.1469	36.72	81	180	86	15	100	15.8	175	7.7	14.6	0.527397	3	134	5.9	9.3	100	10.8	0	0	0	0	1	0	1	1	0	1	7	61	33	7	0	0	1	0	1	0	53.75	7.72	0	0
54	2	64.39999999999999	168	22.8175	36.33	93	170	90	17	95	11.3	237	7.7	16.2	0.475309	1.6	136	3.7	8.6	76	2.3	0	0	0	0	1	0	1	0	0	0	4	28	26	7	0	1	0	1	1	0	50.35	1.4	0	1
56	1	114	160	44.5312	36.94	93	115	61	19	100	11.3	269	12.7	14.6	0.869863	2.8	137	4.2	7.6	386	1	0	0	0	0	0	1	1	0	0	1	4	40	39	2	0	0	0	0	1	1	24.62	5.12	0	0
45	1	107.75	160	42.0898	38.94	122	115	61	25	95	15	240	9.3	15.8	0.588608	2.3	135	4.1	7.3	153	0.4	1	0	0	0	1	0	0	0	0	1	7	57	35	0	0	1	0	0	1	1	27.52	20.37	0	0
38	1	78.8	168	27.9195	38.44	119	152	20	43	100	9.5	238	8.1	15.7	0.515924	2.8	135	3.2	8.4	93	0.5	0	0	0	0	1	0	0	0	0	1	2	41	33	0	0	0	0	0	0	0	5.09	1.86	0	0
79	1	157	157	63.6943	36.78	126	116	53	18	100	12.7	235	8.7	16.9	0.514793	2.8	136	4.5	8.7	198	0.8	0	1	0	0	1	1	1	1	0	1	1	36	42	6	0	0	0	0	1	1	15.67	3.11	0	0
60	2	99.65	170	34.481	36.94	78	143	71	19	98	7	102	8.6	14.1	0.609929	2.5	125	4.6	7.3	124	8.3	0	0	0	0	1	0	1	0	0	1	8	47	31	12	0	0	1	0	1	0	41.43	1.13	0	1
79	1	62	168	21.9671	36.78	71	153	91	13	98	3.8	214	12.1	13.9	0.870504	2.8	128	4	8.4	92	0.5	0	0	1	0	0	0	0	1	0	1	1	25	22	6	0	0	1	0	0	0	3.71	2.03	0	0
63	1	60.1	165	22.0753	37.67	92	104	75	15	99	7.8	156	8.5	15.1	0.562914	1.9	143	4.6	6.7	118	0.4	0	0	0	0	0	0	0	0	0	1	7	37	36	3	0	0	1	0	0	1	5.83	3.21	0	0
79	2	73.03333333333333	168	25.8763	36.61	119	113	69	24	98	19.9	183	10.9	14.9	0.731544	2.9	142	5.2	10.1	155	1.9	0	1	0	0	1	0	1	1	0	1	6	65	36	6	0	1	0	0	1	0	16.53	1.97	1	1
62	2	76.6	173	25.5939	36.83	84	197	97	17	100	3.6	435	8.1	14.7	0.55102	2.8	142	3.6	8.5	83	0.9	0	0	0	0	0	1	0	0	0	0	0	22	17	2	0	0	0	0	0	0	10.85	1.28	0	0
40	2	65	168	23.03	37.11	97	100	64	12	96	6.8	32	9.9	18.8	0.526596	1.9	129	3.2	7	92	0.8	1	0	1	0	1	0	0	0	0	0	7	47	26	3	0	0	1	0	0	0	4.71	1.53	0	1
78	2	99.5	183	29.7112	36.28	45	129	55	6	100	9	298	11.4	12.7	0.897638	3.4	137	3.7	8.9	141	0.8	0	0	0	0	1	1	0	0	0	1	1	32	37	6	0	0	1	0	1	1	86.36	7.27	0	0
46	1	84.4	168	29.9036	37.89	79	134	70	14	100	7.5	151	13.2	13.5	0.977778	2.8	138	4	8.9	154	0.8	1	0	1	0	0	0	0	0	0	0	1	21	13	1	0	1	1	0	0	0	4.12	1.14	0	0
80	1	93.73333333333333	168	33.2105	36.56	86	113	99	12	92	11.7	367	8.3	16.5	0.50303	2.8	137	3.9	7.6	97	0.8	0	1	0	0	1	0	0	0	0	1	3	43	38	7	0	0	0	0	1	0	12.15	4.01	0	0
51	1	99.3	173	33.1785	37.06	120	127	107	22	97	14.4	352	7	19.2	0.364583	2.8	141	4	7.4	108	0.6	0	0	0	0	0	0	0	0	0	1	0	26	19	2	0	1	0	0	1	1	9.47	5.48	0	0
66	2	89.7	183	26.7849	36.39	83	111	76	27	93	5.4	112	12.5	14.2	0.880282	2.8	130	4.2	7.9	106	1.9	0	0	0	0	1	1	0	0	0	0	3	38	23	2	0	0	0	0	1	0	6.1	1.05	0	0
43	2	86.15	168	30.5237	37.28	92	143	107	16	99	6	230	11.7	18.9	0.619048	2.8	138	3.1	9	106	0.8	0	1	0	0	0	1	0	1	0	0	2	35	16	3	0	0	0	0	0	0	6.47	1.52	0	0
65	1	66.6	168	23.5969	37.17	91	152	73	18	99	10.2	117	8.6	17	0.505882	2.8	139	4.3	8.3	102	1.5	0	0	1	1	0	0	0	1	0	1	10	46	31	5	0	1	0	0	1	0	15.81	3.02	0	0
73	2	125.7	188	35.5647	36.11	116	101	49	37	96	25.5	200	9.9	14.7	0.673469	1.3	146	4.1	8.3	184	1.8	0	0	0	0	1	0	0	1	0	1	12	96	51	5	0	0	0	0	1	1	28.65	15.45	0	0
80	2	96	168	34.0136	36.83	125	159	98	16	93	5.1	149	12.5	15.7	0.796178	2.8	141	4	8.5	163	1.3	0	1	1	0	0	0	1	1	0	1	2	33	37	11	0	1	0	0	0	0	4.98	1.75	0	0
76	2	81.3	168	28.8053	37.28	64	123	52	15	99	14.4	171	12.7	14.6	0.869863	2.8	148	4.1	8.2	220	1.3	0	0	0	0	0	1	0	0	0	1	2	23	19	6	0	0	0	0	1	0	19.67	3.89	0	0
56	2	69.1	168	24.4827	36.78	98	109	49	17	91	7	207	9.6	14.6	0.657534	2.8	137	4.2	8.1	157	1.1	0	0	0	0	0	1	0	0	0	0	2	52	28	3	0	0	0	0	0	0	3.61	1.07	0	0
46	1	59.8	168	21.1876	36.89	121	154	97	22	99	12.8	109	7.7	18.8	0.409574	1.9	134	3.8	7.9	154	0.7	0	0	1	0	1	0	0	0	0	1	2	30	33	6	0	0	0	0	1	1	29.54	4.58	0	0
55	2	132	168	46.7687	37.72	98	126	74	35	96	10.8	66	9	15.2	0.592105	2.9	141	4	8	103	0.7	0	0	1	0	0	0	0	0	0	1	2	35	23	2	0	0	0	0	1	0	3.84	2.89	1	1
59	2	89.2	168	31.6043	36.72	117	111	78	19	99	18.7	435	7.6	18.3	0.415301	2.8	143	6	8.4	120	6.5	1	0	0	0	1	0	0	0	0	1	5	48	38	4	0	1	0	0	1	0	14.64	14.54	0	0
62	1	60	163	22.5827	36.44	78	103	72	13	96	4.5	100	7.7	14.5	0.531034	2.1	128	4.6	7.9	71	1.8	1	0	0	0	1	0	0	1	0	0	5	52	23	4	0	1	1	0	0	0	19.81	5.47	1	1
67	1	73	168	25.8645	37.44	82	85	58	26	95	5.3	161	7.8	16.2	0.481481	2.9	142	4.3	7.1	99	0.9	0	0	0	0	1	0	0	0	0	0	5	59	30	3	0	1	0	0	1	0	18.68	1.5	0	0
26	1	93.60000000000001	168	33.1633	36.28	118	113	47	14	100	2.7	116	9.9	14	0.707143	2	141	4.9	7.8	175	0.5	0	0	0	0	1	0	1	0	0	1	3	50	31	2	0	0	0	0	1	1	14.02	5.98	0	0
76	2	79.65	168	28.2207	37.11	81	100	62	25	96	12.2	93	14	13.1	1.0687	2.9	140	4.8	8.9	91	1.4	0	0	0	0	1	0	0	0	0	1	5	24	32	5	0	0	0	0	1	1	17.92	2.49	0	0
66	1	90	165	33.0579	37.56	81	114	74	20	97	10.5	144	11.8	13	0.907692	2.8	139	4.7	8.5	167	1.1	0	0	0	0	1	0	0	0	0	1	5	20	35	3	0	1	0	0	0	1	15.88	1.01	0	0
65	1	100.5	163	37.826	36.72	90	119	63	20	97	9.4	363	9.5	16.1	0.590062	2.8	138	4.9	8.3	98	6.3	0	0	1	0	0	1	0	0	0	1	5	34	24	6	0	0	0	0	1	0	4.76	2.8	0	0
53	2	90.2	185	26.355	37.28	80	115	73	17	100	12.8	252	13.6	13.7	0.992701	2.8	132	5.2	8.5	140	1.1	0	0	0	0	1	1	0	0	0	1	3	27	16	2	0	0	0	0	1	0	30.21	25.05	0	0
26	1	77.5	168	27.4589	37.17	125	84	57	19	100	12.3	295	14.5	14.9	0.973154	2.8	142	3.4	8.1	137	1.9	1	0	0	0	0	0	0	0	0	1	7	71	36	1	0	0	0	0	0	0	1.14	2.06	1	1
48	1	127.06666666666666	163	47.8252	36.78	144	117	66	18	98	8.9	296	13.5	17	0.794118	1.1	140	3.3	7.5	216	1.3	0	0	0	0	1	0	0	0	0	1	11	95	45	4	0	0	0	1	0	1	44.66	44.82	0	1
61	1	102.63333333333333	163	38.629	36.5	52	102	64	19	99	6.4	84	11.1	17.6	0.630682	2.7	133	4.7	7.8	188	3.6	0	1	0	1	1	0	1	0	0	1	12	86	38	6	0	0	1	0	1	1	5.88	5.95	1	1
46	2	105.9	178	33.4238	36.89	64	108	59	13	93	26.8	162	8.7	17.5	0.497143	2.8	130	4.6	9	127	1	0	0	0	0	0	1	0	0	0	0	2	31	24	0	0	0	0	0	1	1	14.95	1.33	0	0
55	2	96	168	34.0136	37.06	87	118	79	26	95	3.3	128	8.9	20.1	0.442786	3.8	137	4.5	9.2	108	0.8	0	0	0	0	1	0	0	0	0	1	2	39	26	3	0	0	0	0	1	1	22.79	16.47	0	0
75	1	65.8	168	23.3135	36.72	72	162	71	20	96	5.3	209	9.1	19	0.478947	3.2	136	5.4	9.2	149	4.1	0	0	0	0	0	1	0	0	0	1	3	46	17	5	0	0	0	0	1	0	29.08	3.16	0	0
44	1	117.7	168	41.7021	36.72	117	101	58	14	93	16.3	213	9.5	14.2	0.669014	3.3	135	4.8	8.6	92	1.7	0	0	0	0	1	0	0	0	0	1	5	52	34	4	0	1	1	0	1	0	15.59	1.59	1	1
50	2	81.4	183	24.3065	37.17	112	109	83	26	95	11.1	78	12.7	14.1	0.900709	3.4	138	4.2	8.5	117	0.8	0	0	0	0	0	0	0	0	0	0	3	30	30	2	0	0	0	0	1	0	10.04	1.49	0	0
62	1	72.7	168	25.7582	36.94	130	111	67	23	97	7.9	234	13.1	14.1	0.929078	2.8	141	4.4	8.4	115	0.7	0	1	0	0	1	0	0	0	0	1	1	49	39	2	0	0	1	0	1	0	9.96	4.22	0	0
78	2	78	178	24.6181	36.39	117	229	176	22	99	13.6	365	8.3	23.4	0.354701	3.5	139	5.6	8.4	190	2.1	0	0	0	0	1	0	0	1	1	1	4	48	27	7	0	1	0	0	1	0	11.12	8.96	0	0
62	2	70.4	168	24.9433	37.06	94	118	71	16	98	11.2	466	10.8	17.3	0.624277	3.4	135	4.8	8.5	72	0.2	0	0	1	0	1	0	0	0	0	1	4	36	46	2	0	0	0	0	0	1	3.87	3.87	0	0
66	2	91	168	32.2421	36.72	91	116	63	20	95	11.8	576	7.1	16	0.44375	2.8	142	3.8	8	147	0.9	0	0	0	0	0	1	0	0	0	1	1	24	27	2	0	0	0	0	1	0	33.86	3.35	0	0
63	2	52.7	178	16.633	37.44	83	133	80	20	94	14.3	197	10.3	15.6	0.660256	3.4	137	4	8.4	113	0.5	0	0	0	0	0	1	0	0	0	1	1	23	24	2	0	0	1	0	1	0	7.36	1.92	0	0
73	1	73.6	168	26.0771	36.67	99	106	53	21	98	6.8	132	7.6	14.6	0.520548	2.6	139	4.6	7.9	138	4.1	0	1	1	1	1	0	0	1	0	0	5	43	22	7	0	0	0	0	1	0	38.8	6.82	0	1
78	1	51.8	168	18.3532	36.94	87	113	43	22	100	10	286	9.3	16.7	0.556886	3.2	129	5	8.8	103	4.2	0	0	0	0	1	0	0	1	0	1	5	45	26	6	0	1	0	0	0	0	18.07	6.26	0	0
74	2	64.9	173	21.6847	34.5	104	207	103	20	100	13.6	110	10.1	14.9	0.677852	2.8	138	3.9	6.3	192	2.6	0	1	0	0	1	1	0	0	0	0	7	71	36	5	0	0	0	0	1	1	15.75	4.78	0	0
60	2	88.1	173	29.4363	36.72	93	109	66	16	100	7.2	154	11.7	17.4	0.672414	3.1	136	4.7	8.6	169	0.9	1	1	0	0	1	0	0	0	0	1	3	53	34	8	0	0	0	0	1	0	7.4	5.92	0	0
66	2	153.8	168	54.4926	36.94	108	123	66	21	93	9.8	179	9.2	15.7	0.585987	2.8	136	4.8	8.1	199	2.3	0	0	1	0	0	0	1	0	0	1	3	36	19	6	0	0	0	0	1	0	6.25	1.24	0	0
57	2	78.7	168	27.8841	36.78	106	123	78	22	96	16.2	233	12.1	15.5	0.780645	3.7	136	4.1	9	173	0.9	0	1	0	0	0	1	0	0	0	1	3	36	27	2	0	0	1	0	0	0	3.68	1.11	0	0
77	2	86	183	25.6801	36.56	83	127	83	17	98	10.3	271	13.8	13.1	1.05344	2.8	135	4.9	9.3	175	1.1	0	0	0	0	0	1	1	0	1	0	4	33	20	5	0	0	0	0	1	0	2.38	2.36	0	0
77	1	60	163	22.5827	38.61	124	94	76	18	100	14.2	195	15.7	17.9	0.877095	2.7	152	3.7	8.9	292	2.1	0	0	1	0	1	1	0	0	0	1	7	61	48	6	0	1	0	0	1	1	11.82	5.68	0	0
41	2	135	180	41.6667	36.94	96	125	70	48	98	10.9	415	9.6	15.4	0.623377	2.7	142	4.6	8.4	117	1.6	0	0	0	1	1	1	0	1	1	1	8	59	40	2	0	0	0	0	1	0	32.26	11.27	0	0
38	1	69.4	160	27.1094	37.78	151	130	74	29	93	10.2	25	7.7	16.2	0.475309	2.1	139	2.9	8.2	147	1.4	0	0	0	0	1	0	0	0	0	1	9	85	45	0	0	0	0	0	1	1	19.77	6.74	0	0
61	1	132	168	46.7687	34.67	85	95	63	9	98	15.8	418	8.5	16.2	0.524691	2.4	132	4	8.6	101	3.3	0	0	0	0	1	1	0	0	0	1	6	43	23	2	0	1	0	0	0	0	16.66	2.46	0	0
73	2	92.9	178	29.3208	36.5	80	121	57	18	100	15.9	154	10.5	12.6	0.833333	2.8	137	4.5	7.6	160	0.8	0	0	1	0	1	0	0	0	1	1	7	72	26	4	0	0	0	0	1	0	8.41	1.32	0	0
65	2	176	168	62.3583	36.83	85	101	61	23	96	9.9	148	14.1	13.7	1.0292	3.4	134	4.4	8.5	190	1.3	0	1	0	0	1	0	1	1	0	0	7	32	23	5	0	1	0	0	1	0	16.7	1.06	0	0
69	1	76	168	26.9274	36.83	79	93	30	19	95	13	328	8.4	15.9	0.528302	2.8	141	3.2	7.2	126	0.7	0	0	0	0	1	0	0	1	0	1	4	47	29	4	0	0	0	0	1	0	10.88	8.84	1	1
78	2	107.3	168	38.0173	39.5	88	142	79	23	97	13.1	297	12.1	13.1	0.923664	3.8	138	4.4	8.8	184	1.6	0	0	0	0	1	0	1	0	0	1	6	44	30	9	0	0	0	0	1	0	12.93	1.74	0	0
47	1	211.8	163	79.717	36.61	82	129	65	31	92	16.3	191	13.4	14.7	0.911565	3.4	139	5.1	9.5	252	0.9	0	0	0	0	1	0	0	0	0	1	7	42	31	1	0	0	0	0	1	1	16.49	9.71	0	0
78	2	87	168	30.8248	36.56	124	147	76	30	94	11.1	207	16	12.2	1.31148	3.6	141	3.9	8.6	165	0.9	0	0	0	0	0	0	1	1	1	1	0	30	33	12	0	0	0	0	1	0	14.84	1.62	0	0
62	1	120	165	44.0771	37.67	57	136	85	17	97	18.8	215	14	14.3	0.979021	2.8	139	4.8	8.7	119	1	0	0	0	0	0	1	0	0	1	1	4	16	37	4	0	0	0	0	1	0	11.84	11.85	0	0
28	2	80.5	168	28.5218	38.28	94	132	85	20	100	14.6	198	13.8	13.2	1.04545	2.6	140	4	8.3	101	1	1	0	0	0	1	0	0	0	0	1	2	15	27	0	0	0	0	0	1	1	53.84	53.88	0	0
57	1	62	165	22.7732	36.94	109	133	84	19	100	17.1	264	10.8	12.7	0.850394	3.1	126	3.6	8.4	87	0.3	0	1	0	0	0	1	0	0	0	1	4	32	37	3	0	0	1	0	0	1	6.63	6.75	1	1
43	1	88.9	168	31.498	36.72	93	128	88	22	100	8.2	294	9.3	17.8	0.522472	3	140	3.4	6.8	82	0.6	0	0	0	0	0	0	0	0	0	1	0	20	23	0	0	0	1	0	0	0	3.3	1.25	0	0
53	2	97.8	175	31.9347	36.5	82	101	74	20	94	9.7	159	9.9	14.8	0.668919	2.8	135	3.4	7.3	78	0.9	0	0	0	0	1	0	0	0	0	1	5	16	29	1	0	1	0	0	1	1	3.52	2.73	0	0
54	1	120	165	44.0771	37.78	88	113	63	20	100	14.2	138	14.6	15.9	0.918239	3.1	143	3.1	8.5	103	0.5	1	0	0	0	1	1	1	0	0	0	6	18	35	5	0	0	0	0	1	0	12.66	7.05	0	0
69	2	105.5	185	30.8254	37.33	140	122	89	27	96	9.2	89	12.6	14	0.9	2.6	139	3.6	7.9	97	1.4	0	1	0	0	1	1	0	1	0	1	6	84	31	3	0	0	0	0	1	1	61.06	19.51	0	1
49	2	114	168	40.3912	36.33	124	84	55	21	99	12.3	359	10.4	15.2	0.684211	2.8	137	4.3	11.9	188	2.5	0	0	0	0	1	0	0	1	0	1	3	55	34	5	0	0	0	0	1	0	17.01	2.06	0	0
69	2	73.33333333333333	163	27.6011	39.33	103	84	56	21	100	21.5	348	11.6	16.6	0.698795	2.8	144	4	7.9	210	0.8	0	0	0	0	1	1	1	0	0	0	7	37	31	4	0	1	0	0	1	1	17.17	2.16	0	0
63	1	77	168	27.2817	37.06	123	125	81	16	94	13.5	422	9.1	21.6	0.421296	2.8	139	4.4	8.4	121	1.3	0	0	1	0	0	0	0	0	0	1	3	33	33	2	0	0	0	0	1	0	15.33	2.09	0	0
61	1	73.6	168	26.0771	36.83	92	145	70	16	100	3.9	100	6.9	14.3	0.482517	2.8	143	3.6	8.9	110	0.6	0	0	1	0	1	0	0	0	0	1	4	14	31	2	0	1	1	0	1	1	5.07	1.34	0	0
36	1	54.5	157	22.1104	36.72	139	99	75	37	84	13.7	201	8.2	17.2	0.476744	2.9	139	4	8.3	104	1	0	0	1	0	1	0	0	1	0	1	3	73	34	2	0	0	0	0	1	1	10.42	2.66	1	1
20	1	115.73333333333333	163	43.5595	37.67	115	134	65	28	100	9.2	272	10.4	15.7	0.66242	3.1	137	4.2	8.5	136	0.6	0	0	1	0	0	1	0	0	0	1	5	85	34	0	0	0	0	0	1	1	59.8	5.34	0	0
77	1	92	173	30.7394	36.56	125	97	70	24	98	14.2	170	12.8	15.9	0.805031	2.8	140	3.4	10.1	123	1.3	0	0	0	0	1	0	0	1	0	1	8	64	36	9	0	1	0	0	0	1	3.07	3.12	1	1
35	2	76.5	168	27.1046	38.11	94	101	68	20	91	17.9	227	9.7	12.8	0.757812	2.2	141	3.9	7.5	203	0.2	1	0	0	0	1	0	0	0	0	1	8	41	32	0	0	0	1	0	1	1	18.76	9.74	0	0
32	2	110.6	168	39.1865	36.89	83	122	65	13	100	16.4	182	12	14.5	0.827586	2.8	140	5.2	8.9	152	0.8	0	0	0	0	1	0	0	0	0	1	1	24	35	0	0	0	0	0	1	1	17.47	2.08	0	0
77	1	122.9	163	46.2569	36.5	86	140	64	20	98	5.8	143	7.6	14.5	0.524138	2.8	132	4	9.4	104	0.9	0	0	1	0	0	0	0	1	0	1	2	26	39	7	0	0	0	0	0	0	18.51	4.77	0	0
71	1	98.3	168	34.8285	37.22	111	111	86	21	99	13.2	116	13.1	16	0.81875	2.7	137	5.4	8.8	198	1.7	0	1	0	0	0	0	1	1	0	1	4	48	28	7	0	1	1	0	1	0	10.39	1.12	0	0
66	2	86.5	168	30.6477	37.39	130	91	63	39	92	12	11	6.2	20	0.31	1.8	148	4.3	7.9	173	0.5	0	1	1	0	1	0	0	0	0	1	7	81	36	4	0	0	0	0	1	0	50.66	5.3	0	1
54	2	89	168	31.5334	37.56	80	95	63	16	94	10.1	152	11.9	16.8	0.708333	4.3	140	3.8	8	113	1.2	1	1	0	0	1	0	0	1	0	1	9	32	27	6	0	1	1	0	1	1	39.94	2.49	0	0
77	2	79.5	193	21.3429	37.61	56	130	67	18	98	15.4	265	9.7	16.7	0.580838	3.5	141	3.9	8.4	155	0.7	0	1	0	0	1	0	0	0	0	1	4	48	34	3	0	0	0	0	0	1	27.82	27.82	0	0
48	2	104	168	36.8481	36.5	100	113	70	15	99	10.2	175	8	22.9	0.349345	2.8	131	3.5	8.3	109	0.7	1	0	0	0	0	0	0	0	0	0	2	28	21	2	0	1	0	0	1	0	8.03	1.85	0	0
77	1	44.6	168	15.8022	36.78	99	124	62	18	100	8.2	127	8.6	21.4	0.401869	2.8	136	4.3	8.6	111	2.2	0	0	0	0	0	0	0	1	1	1	5	45	26	8	0	0	0	0	1	0	21.93	1.89	0	1
56	1	93.6	168	33.1633	37.67	107	128	73	18	98	7.4	295	9.7	15.2	0.638158	2.5	142	3.6	8	104	0.4	0	0	0	0	1	1	1	0	0	1	4	29	34	4	0	1	0	0	1	1	4.02	1.85	0	0
39	2	185.8	196	48.3653	36.44	76	163	98	11	100	4.3	184	11.2	16.2	0.691358	2.8	143	4	8.2	112	0.9	1	0	1	0	1	0	0	0	0	1	2	24	22	0	0	1	0	0	1	0	5.44	3.39	0	0
55	2	78.4	168	27.7778	37.06	82	138	80	23	99	8.4	186	13.8	13	1.06154	4.5	137	3.6	8.5	208	0.7	0	0	0	0	0	0	1	0	0	0	0	19	27	5	0	0	0	0	0	0	3.73	1.79	0	0
63	1	80	168	28.3447	36.89	70	150	92	13	97	7.5	250	13.9	13.1	1.06107	4.2	140	4.3	9.4	117	0.8	0	0	0	0	0	1	1	0	0	1	1	16	25	8	0	1	1	0	0	0	5.78	5.8	0	0
66	2	64.3	168	22.782	35.17	90	120	76	19	97	11.9	125	10	17.3	0.578035	2.9	151	3.7	9.1	105	0.9	0	1	0	0	1	0	0	0	0	0	2	36	31	5	0	1	0	0	1	0	13.54	3.71	0	0
52	2	84	178	26.5118	38.94	122	107	79	32	97	23.8	217	13.9	17.4	0.798851	2.6	129	4.3	8.8	109	1.7	1	0	0	0	1	0	1	1	0	1	3	50	33	6	0	1	0	1	1	0	24.01	11.2	0	1
62	1	126.1	175	41.1755	37.28	83	162	108	15	100	13.8	231	13.3	13.2	1.00758	3.7	140	3.2	9.2	182	0.6	0	0	0	0	1	0	0	0	0	1	3	27	18	7	0	0	0	0	0	1	57.51	36.69	0	0
73	1	84	165	30.854	36.67	145	136	71	26	85	17.7	177	9	17.6	0.511364	2.9	136	3.9	7.4	181	1.3	1	0	0	0	1	1	1	0	0	1	9	58	45	6	0	1	0	0	0	1	5.15	6.06	1	1
72	2	83.3	180	25.7099	36.44	79	127	85	30	93	10.3	300	10.9	16.1	0.677019	2.8	143	3.3	9.2	81	1	0	0	0	0	0	0	0	0	0	1	1	25	33	9	0	1	0	0	1	0	7.84	1.89	0	0
33	1	68	168	24.093	37.22	100	124	85	26	91	4.5	129	7.8	20	0.39	2.8	138	4.1	8.6	123	0.7	0	0	1	0	0	0	0	0	0	0	2	19	27	0	0	0	0	0	0	0	2.17	2.17	0	0
73	1	98.79999999999998	170	34.1869	35.56	86	101	64	28	100	14.4	56	8.8	15.3	0.575163	3.2	140	6.1	7.6	439	1.8	0	0	1	0	0	0	0	0	0	1	11	85	46	3	0	0	1	1	0	1	1.73	1.68	1	1
59	1	126.1	168	44.6783	36.61	106	121	97	14	99	6.3	268	12.3	14.6	0.842466	2.8	142	3.7	9.4	109	1	0	1	0	0	0	0	0	1	0	1	1	38	31	4	0	0	0	0	0	0	6.19	1.2	0	0
61	2	62	170	21.4533	36.56	79	142	77	11	100	10	244	13	11.5	1.13043	2.8	136	3.9	9.4	111	0.8	1	0	0	0	0	0	0	0	0	0	1	23	21	2	0	0	0	0	1	1	7.29	2.21	0	0
67	1	60.9	170	21.0727	36.72	96	131	82	18	99	4.3	194	9.3	14.7	0.632653	3.9	125	3.9	8.7	173	0.9	0	0	0	0	1	1	0	1	0	1	2	54	38	3	0	1	0	0	1	1	32.58	8.7	0	1
31	2	73.75	168	26.1302	35.33	113	123	82	16	100	17.4	141	7.9	13.3	0.593985	2.7	140	4.2	9.8	254	1	0	0	0	0	1	0	0	0	0	1	1	32	32	0	0	0	0	0	0	1	7.69	8.74	1	1
76	1	71.2	168	25.2268	35.94	114	95	78	13	86	12.2	281	15.2	12.2	1.2459	2.8	140	6.7	9.5	179	0.9	0	0	0	1	0	0	0	1	0	1	3	50	41	4	0	1	0	0	1	0	8.62	1.63	0	1
59	1	117.5	173	39.2596	37.28	113	123	76	25	93	6.6	279	11.1	15	0.74	2.8	140	3.3	8.8	99	0.8	0	0	0	0	0	1	0	0	0	1	0	32	26	2	0	1	1	0	1	0	4.75	1.97	0	0
70	2	82.45	183	24.62	37.5	68	109	71	19	97	18.6	419	8.2	13.4	0.61194	1.9	144	4.5	8.4	95	0.9	1	1	0	0	1	1	0	0	0	1	5	45	29	4	0	0	0	0	1	0	17.08	17.09	0	0
46	2	73.9	168	26.1834	35.89	97	137	118	19	100	7	110	9.4	14.7	0.639456	3.4	148	4	6.9	133	0.6	0	0	1	0	1	0	0	0	0	1	2	25	30	4	0	0	0	0	0	0	8.78	1.76	0	0
62	1	107.3	165	39.4123	36.56	74	106	39	21	96	14.1	212	9.2	14.8	0.621622	2.8	137	4.2	8.1	81	3.4	1	0	0	0	0	1	0	0	0	1	5	83	35	3	0	0	0	0	1	1	12.55	5.26	0	0
65	1	109	168	38.6196	36.78	85	82	55	19	100	0.2	32	9.2	20.5	0.44878	2.8	140	4.9	7.5	76	3.5	1	1	0	0	1	0	0	0	0	1	7	75	33	4	0	1	0	0	1	0	13.74	3.89	0	0
67	1	82.1	160	32.0703	36.94	83	143	72	20	92	11.5	174	11.3	12.8	0.882812	2.8	142	3.8	9.3	117	0.8	0	1	0	0	0	1	0	0	0	1	0	36	25	2	0	0	0	0	1	0	14.86	4.9	0	0
40	2	97	183	28.9647	36.5	83	123	90	12	98	12.1	389	15.5	13.2	1.17424	4	137	3.8	9.5	184	0.9	0	0	0	0	0	0	0	1	0	1	1	17	19	5	0	0	1	0	1	0	8.09	8.12	0	0
60	1	71.7	168	25.4039	36.83	84	105	57	29	95	12.3	125	8.2	18	0.455556	2.8	139	3.1	7.6	118	0.7	0	0	1	0	1	0	0	0	0	0	4	24	20	8	0	0	0	0	1	0	5.59	1.24	0	0
46	2	101.75	168	36.0509	37.39	100	120	68	14	97	16.5	190	14.2	12.9	1.10078	4.2	141	3.4	8.7	157	0.9	0	0	0	0	0	0	0	0	0	0	0	20	13	4	0	0	0	0	0	0	12.2	1.86	0	0
77	1	141	168	49.9575	37	89	114	43	27	92	0.9	22	8	20.9	0.382775	2.8	139	4	7.2	163	3.9	0	0	0	0	0	1	1	0	0	1	14	113	35	8	0	0	0	0	1	0	18.88	2.03	1	1
63	1	93.5	168	33.1278	37.22	129	113	68	37	95	13.1	202	11.6	14.2	0.816901	2.8	141	4.2	9	211	0.9	0	0	0	1	0	0	1	0	0	1	0	33	39	3	0	0	0	0	1	0	5.04	1.07	0	0
33	2	152.7	191	41.8574	36.89	104	135	92	14	98	7.4	211	12.7	12.8	0.992188	2.8	141	4.1	8.9	94	0.7	0	0	1	0	0	0	1	0	0	0	0	23	28	1	0	1	0	0	1	0	2.36	1.29	0	0
73	1	88.2	168	31.25	36.89	114	110	61	20	100	9.6	177	7.2	14.1	0.510638	2.6	145	3.8	8	170	0.6	0	1	1	0	0	1	1	0	0	1	1	30	28	5	0	1	0	0	0	0	6.72	3.75	0	0
57	1	60.7	168	21.5065	36.33	79	121	78	20	100	12.1	204	11.1	12.6	0.880952	3.8	143	3.4	7.9	124	0.5	1	0	0	0	1	0	0	0	0	1	1	27	32	1	0	0	1	0	1	1	72.29	5.24	0	0
51	2	66.9	173	22.3529	36.67	87	121	96	28	93	9.8	174	13.4	16.5	0.812121	3.4	141	4.6	8.7	198	1.2	1	0	0	0	0	0	0	1	0	1	1	23	18	5	0	0	1	0	1	0	9.8	4.91	0	0
55	2	71.2	175	23.249	37.28	76	95	54	24	94	3	102	10.6	14.3	0.741259	2.6	139	3.7	7.3	83	0.9	0	0	0	0	1	0	0	0	0	0	2	18	23	1	0	0	1	0	0	0	6.74	1.08	0	0
77	1	77	168	27.2817	37	119	138	81	30	98	9.5	208	11.8	13.8	0.855072	2.8	132	4.6	8.3	193	0.7	0	0	0	1	0	1	1	0	0	0	1	31	28	4	0	0	1	0	1	0	6.91	1.22	0	0
52	1	115	168	40.7455	37.11	125	114	101	22	100	17.8	382	12.6	13.8	0.913043	2.1	143	4.6	6.7	176	1.6	0	0	0	0	1	1	0	0	0	1	10	50	39	1	0	0	0	0	1	1	22.29	4.23	0	0
52	2	87.4	170	30.2422	36.83	99	119	76	23	100	9.9	158	12.1	14.5	0.834483	3.2	142	4.4	9.5	111	1	0	0	0	0	1	0	0	0	0	1	11	76	38	1	0	0	0	0	0	0	4.56	4.55	1	1
58	2	120.2	185	35.1205	36.44	87	119	80	4	98	13.6	115	10.4	14.4	0.722222	2.8	134	5	7.8	134	1.1	0	0	0	1	0	0	0	1	0	0	5	33	39	2	0	1	0	0	0	1	16.07	1.16	0	0
62	2	120	168	42.517	36.56	78	108	60	29	94	6.8	121	10.5	16.4	0.640244	2.8	123	3.1	8.2	54	3.3	0	0	0	0	0	0	1	0	1	0	5	59	20	11	0	0	0	0	0	0	3.21	1.97	0	0
65	1	93.5	147	43.269	36.89	80	123	48	23	100	9.4	97	6.6	12.7	0.519685	2.8	142	3.8	7.6	98	2	0	0	0	0	1	0	1	0	0	1	8	58	35	7	0	0	0	0	1	1	14.3	4.22	0	0
50	2	77	173	25.7276	36.89	90	133	80	22	100	16.8	305	9.2	14.1	0.652482	2.8	134	4.3	9.2	178	0.8	0	0	0	0	1	0	0	0	0	1	4	31	28	2	0	0	0	0	1	0	26.9	8	0	0
43	2	95.1	175	31.0531	36.67	90	120	63	28	100	9.5	169	12.4	14.6	0.849315	3.3	132	4.4	7.7	76	36.4	0	0	0	0	0	0	0	0	0	1	6	44	25	3	0	0	0	0	0	0	23.21	2.97	0	0
32	2	94.05000000000001	191	25.7805	36.39	90	130	53	15	99	16.4	238	12.6	14.4	0.875	3.4	143	4.5	8	142	0.9	0	0	0	0	1	0	0	0	0	1	4	33	34	0	0	1	1	0	0	1	37.17	15.41	0	0
63	1	66	168	23.3844	36.11	65	115	64	18	100	3.6	363	10.4	14.4	0.722222	2.8	146	4.2	9.4	92	0.7	0	0	0	0	1	0	0	0	0	0	4	52	36	2	0	0	1	0	1	0	4.73	2.84	0	0
68	1	86.4	163	32.5191	36.78	82	130	59	17	98	10	235	8.6	18.6	0.462366	2.4	161	3.3	8.4	253	1.8	0	0	0	0	1	0	1	1	0	1	5	67	28	7	0	1	0	0	0	0	20.84	5.24	0	0
54	1	105.85	163	39.8397	36.83	104	95	54	27	96	10.9	291	12.4	13.2	0.939394	2.8	129	4.3	8	156	0.7	0	0	0	0	1	1	0	0	0	1	5	60	31	1	0	1	0	0	1	1	9.68	2.27	0	0
64	2	112.75	168	39.9483	36.5	80	107	64	14	98	3.7	176	10.8	12.9	0.837209	2.8	139	4.2	8.6	121	1.6	0	0	0	0	0	0	1	1	0	0	2	44	22	7	0	0	1	0	0	0	3	1.68	0	0
44	2	92	185	26.8809	36.28	71	132	101	15	72	5.5	199	10.5	18.5	0.567568	2.8	127	4.6	8.8	364	2.3	0	1	0	0	0	0	0	1	0	1	11	57	26	1	0	0	1	1	1	1	5.74	2.64	0	0
77	1	53.3	150	23.6889	36.44	108	87	56	14	86	17.6	90	6.3	15.9	0.396226	2.8	130	3.7	6.5	162	0.7	0	0	0	0	1	1	1	0	0	1	15	85	56	11	0	0	1	0	1	1	16.14	2.61	1	1
76	1	48	147	22.213	37.22	54	148	48	26	98	9.1	275	13.2	12.6	1.04762	2.8	141	4.3	9	102	0.6	0	0	0	0	0	1	0	0	0	1	1	33	30	4	0	0	0	0	1	0	4.77	1.57	0	0
51	2	70	170	24.2215	36.11	99	96	66	18	99	15.9	358	10.7	18.4	0.581522	2.8	131	6.4	8.6	117	9.2	0	0	0	0	1	0	0	0	0	1	8	54	36	3	0	1	1	1	1	1	12.97	12.99	1	1
52	2	136	173	45.4409	36.44	94	95	51	29	86	20.3	125	13.5	15.8	0.85443	2.5	125	4.4	8	144	1.3	0	0	0	0	1	0	0	1	0	1	8	56	29	3	0	0	1	0	0	1	20.66	20.74	1	1
43	1	115	168	40.7455	36.67	125	110	76	19	96	7.9	216	12.3	13.4	0.91791	2.8	137	4	8.5	156	0.7	1	0	0	0	0	0	0	0	0	1	1	27	25	1	0	0	0	0	0	0	15.88	2.99	0	0
77	1	69.4	163	26.1207	36.67	123	136	81	31	87	19	352	11.4	13.8	0.826087	3.3	142	4.5	8.6	106	1	0	0	0	0	1	1	0	0	0	1	11	105	56	4	0	0	0	0	0	1	0.96	1.01	1	1
35	1	61	163	22.9591	35.11	100	110	67	18	75	23.5	447	11.1	17.7	0.627119	1.7	135	3.6	8.3	118	1.1	1	0	0	0	1	0	0	0	0	1	9	63	46	1	0	0	1	0	1	1	30.9	13.89	0	0
75	2	81.4	168	28.8407	36.83	81	140	75	21	98	13.1	136	8.6	15.1	0.569536	2.8	138	4.9	8.1	176	1.5	0	0	0	0	1	1	0	0	0	1	3	43	41	4	0	1	0	0	1	0	4.36	1.36	0	0
77	1	60	168	21.2585	37.06	103	111	58	20	100	12	279	9.9	16.5	0.6	3.3	145	3.5	8.9	167	0.5	1	0	0	0	1	0	0	0	0	1	3	32	34	7	0	1	0	0	1	1	12.29	2.82	0	0
52	1	51.8	173	17.3076	36.61	93	127	83	20	96	10	159	8.8	14.3	0.615385	1.4	129	4.1	7.1	96	0.5	0	0	1	0	0	0	0	0	0	1	5	37	27	6	0	1	0	0	0	1	1.8	1.8	0	1
56	2	86.8	178	27.3955	37.11	124	154	106	51	92	18.7	798	8.4	14.2	0.591549	2.3	136	4.6	8.3	155	0.6	0	0	0	0	1	1	0	0	0	1	4	50	40	1	0	1	0	0	1	0	42.97	2.55	0	0
65	1	140	168	49.6032	37	96	141	111	21	93	15.2	234	14.1	12.9	1.09302	2.8	139	3.1	8.6	143	0.6	1	0	0	0	0	0	0	0	0	1	1	21	24	3	0	0	0	0	1	0	3.11	1.14	0	0
80	1	84.6	168	29.9745	37.61	129	106	86	18	95	14.3	57	14.7	13.4	1.09701	2.5	138	3.9	8.8	93	0.8	0	1	1	0	1	0	0	0	0	1	5	60	31	4	0	1	0	0	0	0	8.79	2.78	0	0
55	2	91.9	178	29.0052	38.22	110	127	75	20	95	3.3	208	10.6	15.1	0.701987	2.8	136	3.8	8.4	98	0.6	0	0	0	0	1	0	0	0	0	1	4	45	30	4	0	1	1	0	1	0	4.29	2.14	0	0
60	1	72.8	168	25.7937	36.78	105	98	65	29	99	12.5	139	6.8	19.1	0.356021	2.5	136	4.2	9.5	116	0.7	0	0	1	0	1	0	0	0	0	1	8	52	36	3	0	1	0	0	0	0	20.08	4.04	0	0
66	2	74.3	168	26.3251	36.5	127	104	58	20	96	28.9	432	5.7	17.2	0.331395	1.7	129	5	8.1	129	2.7	1	0	0	0	1	1	0	0	0	1	4	77	32	9	0	1	0	0	0	0	19.52	1.15	0	1
33	1	72.6	168	25.7228	36.94	117	123	59	19	95	3.6	150	7.4	21.9	0.3379	3.5	140	2.9	8.7	94	0.6	0	0	1	0	0	0	0	0	0	0	4	45	29	0	0	0	1	0	0	0	19.13	1.64	0	0
59	1	65.05	157	26.3905	36.89	86	76	41	13	98	8.6	105	9.3	15.5	0.6	3	146	4.7	9.2	222	0.4	0	1	0	0	1	1	1	0	0	1	7	32	29	5	0	0	0	0	1	1	16.13	11.11	0	0
68	2	88	168	31.1791	37.17	53	68	53	22	99	15.2	209	14.6	13.2	1.10606	2.2	138	5.2	8.4	164	1.3	0	1	0	0	1	1	0	0	0	1	5	47	36	3	0	0	0	0	0	1	18.08	18.17	1	1
53	1	115.6	165	42.461	36.83	108	122	76	18	94	8.2	184	10.4	14.1	0.737589	2.8	139	3.3	9.2	230	1.1	0	0	0	0	0	1	0	0	0	1	1	33	23	3	0	0	0	0	1	0	2.61	2.56	0	0
51	1	96.1	168	34.049	37.17	120	110	70	24	86	30.2	86	9.2	15.4	0.597403	2.4	130	4.9	6.3	82	2.6	1	0	0	0	1	0	0	0	0	1	14	87	42	6	0	0	0	0	1	0	12.64	4.89	0	0
78	2	90	178	28.4055	NULL	105	84	39	26	92	17.1	121	6.6	16.6	0.39759	2.3	139	4.8	8.5	90	1.7	0	1	1	0	1	0	1	1	0	1	15	92	50	9	0	0	0	1	0	1	1.78	1.8	1	1
68	2	78.2	168	27.7069	35.44	99	101	62	33	97	19.7	79	11.4	16.1	0.708075	1.4	139	3.6	7	195	0.8	1	0	0	0	1	0	0	0	0	1	11	96	50	3	0	0	0	0	0	1	8.19	6.15	1	1
54	1	61.2	168	21.6837	37.06	95	101	75	17	100	10.5	351	7.5	18.6	0.403226	3.5	134	4.3	8.5	92	0.8	1	0	0	0	0	0	0	0	0	1	1	31	22	2	0	0	1	0	0	0	2.87	1.95	0	0
51	2	51.2	168	18.1406	35.61	58	146	89	18	100	10.8	535	10.7	13	0.823077	4.2	138	3.8	8.7	101	0.6	0	0	0	0	0	0	0	0	0	0	0	27	26	3	0	0	0	0	0	1	71.49	2.48	0	0
62	2	86.86666666666667	178	27.4166	37.89	105	89	67	17	93	8.5	70	12.3	14.2	0.866197	2.5	143	4.5	7.4	107	2.6	0	0	1	0	1	1	0	0	0	1	10	43	27	2	0	1	0	0	1	1	11.4	6.49	0	0
61	1	58.2	160	22.7344	36.83	66	127	62	11	100	5.7	93	9.8	12.5	0.784	2.8	143	4	8.8	132	0.6	1	0	1	0	1	0	0	0	0	0	9	77	21	2	0	0	0	0	1	0	4.93	1.13	0	0
51	2	107.3	168	38.0173	35.22	75	104	56	11	100	13.2	322	10.3	14.6	0.705479	2.8	145	3.8	7.8	122	0.7	0	0	0	0	1	1	0	0	0	1	6	63	33	1	0	0	1	0	0	1	14.05	14.05	0	0
58	1	50.8	157	20.6094	37	89	105	70	20	100	0.9	40	4.7	22	0.213636	2.6	147	3.4	7.8	117	0.7	0	0	0	0	1	1	0	0	0	1	5	58	31	5	0	0	1	0	1	0	25.08	1.09	0	0
69	1	78	168	27.6361	36.61	76	NULL	NULL	10	93	13.2	486	7.1	15.9	0.446541	2.8	144	4.3	8.6	76	0.7	0	0	0	0	0	1	0	0	0	1	0	18	18	5	0	0	0	0	1	0	8.92	1.96	0	0
51	1	86.6	168	30.6831	37.5	93	132	55	22	100	11.5	238	5.5	15.1	0.364238	3.1	140	4	8.6	57	1.1	1	0	0	0	0	0	1	1	0	1	1	31	23	11	0	0	0	0	1	0	10.11	3.35	0	0
33	1	70.3	168	24.9079	36.67	75	111	65	23	95	10.3	482	8.8	14.5	0.606897	2.6	134	3.7	8.3	107	0.5	0	0	0	0	1	0	0	0	0	1	1	19	16	0	0	0	0	0	0	0	46.92	21.92	0	0
61	2	53.6	168	18.9909	36.61	112	135	69	20	96	23.5	310	10.5	11.9	0.882353	1.9	142	3.9	7.7	143	0.9	0	0	0	0	0	0	1	1	0	0	2	42	34	4	0	0	0	0	1	0	23.88	2.4	0	0
63	2	110	193	29.531	NULL	68	92	49	16	90	16.7	141	9	16.1	0.559006	3	140	4.9	8.5	150	1.4	0	1	1	0	0	0	1	0	0	1	11	88	36	6	0	0	0	0	1	1	4.64	1.17	0	0
74	1	60	155	24.974	36.78	48	97	42	11	98	16.8	432	7.5	19.5	0.384615	3.6	136	5	8.1	109	2.2	1	0	0	0	1	0	0	1	0	1	7	48	36	9	0	0	0	0	1	1	4.8	2.78	0	0
74	1	121.5	165	44.6281	36.72	140	122	68	27	95	8.8	460	11.2	22	0.509091	3.4	138	4.4	7.6	138	1.5	0	0	0	0	1	0	1	0	0	1	4	56	37	8	0	0	0	0	1	0	16.98	3.81	0	0
72	1	84.4	168	29.9036	37.61	99	114	70	20	99	8.8	152	8.3	15.3	0.542484	3	136	4.4	8.3	94	0.6	0	0	0	0	0	0	0	0	0	1	1	25	24	4	0	0	0	0	1	0	8.57	2.32	0	0
70	1	117.05	163	44.0551	36.39	80	126	45	20	100	6.6	280	12.4	13	0.953846	2.8	142	4.2	8.9	118	1	0	0	0	0	0	0	0	0	0	1	4	42	19	5	0	0	0	0	1	0	6.82	3.1	0	0
67	1	83	161	32.0204	37.11	78	125	48	7	95	13.9	296	12	17	0.705882	1.9	137	3.7	7	110	1.3	0	0	0	0	1	1	1	1	0	1	11	92	36	7	0	0	1	0	0	0	18.21	2.95	1	1
74	2	86.9	168	30.7894	36.83	97	98	62	20	95	9.4	338	10.2	21.9	0.465753	2.8	136	4.2	8	98	1	0	0	0	0	0	0	0	0	0	0	0	23	26	12	0	0	1	0	1	0	7.38	1.08	0	0
72	1	60.1	157	24.3823	36	60	138	103	23	100	3.2	175	12.4	12.9	0.96124	3.6	137	3.4	8.9	90	0.9	0	0	0	0	0	0	0	0	0	1	3	16	30	6	0	0	1	0	0	1	3.07	1.75	0	0
79	2	131.65	173	43.9874	36.67	87	110	62	23	96	11.3	164	8.7	16.1	0.540373	3.4	138	4	8.7	124	1.2	0	0	0	0	1	1	0	1	1	1	2	45	28	5	0	0	0	0	1	0	8.13	3.06	0	0
33	1	63.8	165	23.4343	36.39	89	92	66	14	96	20.3	102	9.3	20.2	0.460396	2.3	127	4.6	7.9	125	0.7	0	0	0	0	1	0	0	0	0	1	7	52	30	7	0	1	0	0	1	1	33.71	7.88	0	1
76	1	90.1	163	33.9117	37.56	78	153	92	30	99	9.7	225	9.2	13.8	0.666667	2.8	139	2.8	8.1	125	0.8	0	0	0	0	0	1	0	0	0	0	0	33	28	4	0	1	0	0	1	0	5.77	2.95	0	0
22	1	46.5	168	16.4753	37	89	108	74	17	98	10.7	222	11.3	12.5	0.904	2.8	140	3.8	8.7	105	0.7	0	0	0	0	1	0	0	0	0	1	5	87	38	1	0	1	1	0	1	1	16.93	14.99	0	0
65	1	98.5	165	36.18	37.39	89	86	43	17	98	16.3	308	11.3	13.7	0.824818	2.3	143	3.3	7.8	125	0.6	0	1	0	0	1	0	1	1	0	1	2	38	24	6	0	1	0	0	1	0	10.67	5.05	0	0
78	1	44	156	18.0802	36.94	87	111	57	13	99	17.7	151	10	15.5	0.645161	2.8	141	4.4	7.6	172	0.8	0	0	0	1	1	0	0	0	0	1	9	30	38	10	0	0	0	0	0	1	6.88	6.81	1	1
63	2	92.7	168	32.8444	36.94	71	117	71	19	98	17.9	165	12.6	13.9	0.906475	2.8	142	4.1	8.6	139	0.7	0	0	1	0	0	0	0	0	0	0	0	16	15	4	0	0	0	0	1	0	3.61	3.11	0	1
55	1	71	168	25.1559	36.56	113	121	62	18	95	10.9	366	10.2	13.7	0.744526	2.8	146	3.7	8.6	144	0.4	0	0	0	0	0	0	0	0	0	1	0	29	17	1	0	0	0	0	1	0	8.43	2.2	0	0
65	1	88	157	35.7012	37.06	76	104	61	20	96	27.6	270	10.2	13.4	0.761194	2.6	135	4.1	9.4	119	1.3	0	0	0	0	1	0	0	1	0	0	5	28	25	3	0	0	1	0	1	0	6.54	2.33	0	0
48	2	124	168	43.9342	36.44	63	85	48	14	100	8.4	134	8.8	15.9	0.553459	2.8	144	3.9	8.3	155	2.4	0	1	0	0	0	0	0	1	0	1	4	28	27	3	0	0	0	0	0	0	7.02	2.11	0	0
70	2	74.8	178	23.6081	36.5	52	118	105	14	97	16.2	293	11.1	14.3	0.776224	2.8	139	3.8	9.6	174	0.8	0	0	0	0	0	1	0	0	0	1	8	91	38	5	0	1	0	0	1	0	18.62	4.64	0	0
58	2	147.3	168	52.1896	37.06	105	123	72	27	94	11.8	63	10.7	18.7	0.572193	3	135	4.5	9.2	92	1.6	0	0	1	1	0	0	0	0	0	1	5	49	32	9	0	0	1	0	1	0	19.17	1.07	0	0
66	2	76.8	168	27.2109	37.56	103	139	101	20	100	11.6	134	13.9	14.5	0.958621	3.3	147	3.6	9.1	101	0.7	0	0	0	0	1	1	0	0	0	1	8	53	38	3	0	1	0	0	1	0	32.55	6.71	0	0
30	1	64.4	147	29.8024	36.78	99	97	66	10	100	6.8	135	10.3	13	0.792308	2.7	145	3.9	7.9	103	0.4	0	0	0	1	0	0	0	0	0	1	4	24	29	0	0	0	1	0	1	0	7.96	1.74	0	0
33	1	107.4	155	44.7034	37.44	119	98	48	18	100	2	366	10.7	16.7	0.640719	2.2	136	4	8.1	142	0.8	0	0	1	0	1	1	0	0	0	1	1	55	37	1	0	0	1	0	1	1	81.41	4.58	0	0
74	2	112.15	178	35.3964	35	60	104	67	12	93	5.6	110	13.5	13.8	0.978261	2.8	139	4.6	8.8	172	0.8	0	1	1	0	1	1	0	1	0	1	5	30	39	6	0	0	1	0	1	0	18.23	7.14	0	0
24	1	67.3	168	23.845	36.33	168	100	64	23	94	26.3	955	8.4	15.1	0.556291	2.8	139	5	8.3	128	1.1	1	0	1	0	0	0	0	0	0	1	2	53	26	0	0	0	1	0	1	0	13.68	2.32	0	0
68	1	120	165	44.0771	37.06	84	153	111	14	95	15.7	276	12.1	16.5	0.733333	2.8	126	5.7	9.2	98	7.2	0	1	0	1	1	0	1	1	0	1	9	84	39	7	0	0	1	0	1	0	2.8	2.86	1	1
38	1	90	165	33.0579	36.89	113	118	74	16	94	10.3	119	10.8	13.2	0.818182	3.5	133	3.4	8.4	144	0.6	0	0	0	0	1	0	0	0	0	1	2	36	24	2	0	1	0	0	1	1	46.14	16.14	0	0
30	1	185.3	168	65.6533	37.28	119	145	79	20	100	13.1	386	7.3	17.7	0.412429	2.3	136	4.6	8.6	180	0.7	0	0	1	0	1	0	1	0	0	1	5	115	50	2	0	1	0	0	0	1	28.53	26.71	1	1
60	1	61	168	21.6128	37.22	120	93	63	23	95	16.4	385	14.7	13.5	1.08889	2	130	6.3	7.5	139	0.6	0	0	0	0	0	0	0	0	0	1	1	38	29	8	0	1	0	0	0	0	6.95	3.07	0	0
19	2	73	178	23.04	37.17	78	80	44	18	100	14.7	109	12.1	13.4	0.902985	2.4	142	4.2	8.2	151	1.1	0	0	0	0	1	0	0	0	0	1	8	48	26	0	0	1	0	0	1	0	24.66	11.72	0	0
72	2	98.85	180	30.5093	36.5	81	113	64	17	100	9.7	163	9.6	14.2	0.676056	2.8	135	4.3	8.4	107	0.8	0	1	1	0	1	1	0	0	0	1	2	34	13	4	0	0	0	0	1	0	5.4	2.03	0	0
54	1	51.36666666666667	168	18.1996	37.17	134	145	97	29	99	12.3	797	7.5	18.2	0.412088	2.7	135	4.5	8.7	101	0.3	1	0	0	0	0	0	0	1	0	0	3	24	31	2	0	1	1	0	1	0	21.59	1.26	0	0
42	1	110	168	38.9739	37.56	93	155	72	15	95	9.6	463	7.9	15.1	0.523179	2.5	140	4	8.1	161	2.2	0	0	0	0	0	0	0	1	0	0	3	43	17	6	0	1	1	0	1	0	6.58	2.12	0	0
48	2	103.75	178	32.7452	36.39	71	125	91	19	100	11.8	172	13.6	13.1	1.03817	3.4	143	4.2	8.4	142	1.1	0	0	0	0	1	0	0	0	0	1	4	18	30	1	0	1	1	0	1	1	131.97	15.06	0	0
58	2	119	180	36.7284	39.11	80	58	41	24	99	4.2	122	11.9	13.7	0.868613	2.8	142	3.8	7.4	109	1	0	0	1	0	1	1	1	1	0	1	5	35	32	4	0	0	1	0	1	1	14.13	3.05	0	0
58	1	107.2	175	35.0041	37.06	84	113	60	23	95	15.2	209	12.6	14.8	0.851351	2.7	144	3.6	7.7	113	1.2	0	0	1	0	1	0	0	0	0	1	8	39	47	1	0	1	0	0	1	1	10.8	6.09	0	0
42	1	66.65	168	23.6147	36.89	98	119	75	18	100	10.7	429	8.7	20.4	0.426471	3	140	3.5	8.6	105	0.4	0	0	0	0	0	1	0	0	0	1	0	40	32	9	0	1	0	0	1	0	24.1	12.23	0	1
69	2	65.5	168	23.2072	36.72	91	101	62	18	97	16.1	295	6.9	14.7	0.469388	2.7	139	4.1	7.8	105	0.6	0	0	1	0	1	0	0	0	0	1	4	41	35	4	0	1	0	0	0	1	5.6	1.66	0	0
75	2	125.2	183	37.3854	37.17	87	133	81	16	100	16.9	117	12.2	14.7	0.829932	2.8	142	4.8	9	201	2.7	0	1	1	0	1	0	1	1	1	1	3	44	31	10	0	1	0	0	0	1	6.85	6.95	1	1
39	1	68	168	24.093	37	98	143	70	21	98	12.3	374	7.7	20.8	0.370192	2.8	129	4.9	9.1	99	7.1	0	0	0	0	1	0	0	0	0	1	4	34	15	4	0	0	0	0	1	0	25.06	1.05	0	0
67	1	89	152	38.5215	34.39	103	89	72	17	99	11.5	122	11.8	14.8	0.797297	1.9	139	4.9	6.7	145	1.4	0	0	0	0	0	0	0	0	0	1	8	70	43	9	0	0	0	0	1	1	13.37	2.24	0	0
57	2	87.1	168	30.8603	37.28	103	117	72	16	100	14.3	48	12.1	14.5	0.834483	2.9	155	4.2	7.1	327	1	0	0	1	0	1	1	0	0	0	1	9	38	28	3	0	0	0	0	1	1	5.78	3.12	1	1
68	1	112.05	168	39.7003	36.44	105	80	59	21	92	18.2	635	11.1	13.5	0.822222	2.4	138	4.7	7.6	139	0.9	0	0	0	0	1	0	0	0	0	1	6	36	42	3	0	0	0	0	1	1	11.52	4.5	0	0
77	1	88.44999999999999	163	33.2907	38.06	104	136	101	22	99	10.4	197	9.9	13.9	0.71223	2.5	139	4.3	8.4	96	0.3	0	1	0	0	1	0	0	1	0	1	4	39	51	5	0	1	0	0	1	1	8.8	8.86	1	1
69	1	98.9	168	35.0411	36.44	89	138	74	9	100	7.4	209	10.1	19.6	0.515306	1.3	140	3.9	7	88	0.5	0	0	0	0	0	1	1	0	0	0	7	44	41	3	0	0	0	0	1	0	7.04	1.8	0	0
58	1	175	163	65.8662	36.33	113	119	37	18	95	13.4	194	13	13.9	0.935252	3.5	133	5	8.3	375	2.4	0	0	0	0	1	0	1	0	1	1	5	94	37	3	0	1	0	1	1	1	24.93	24.85	1	1
59	2	111	180	34.2593	37	107	113	59	23	96	10.7	224	10	15.7	0.636943	3.5	119	4.5	8.5	91	2.5	0	1	0	0	1	0	0	1	0	1	4	53	31	3	0	0	0	0	0	0	5.44	2.74	0	0
68	1	74.4	165	27.3278	36.78	130	139	75	23	100	18.2	279	12.6	12.3	1.02439	2.8	135	4.1	8.4	372	1.1	0	0	0	0	1	1	0	0	0	1	8	54	38	2	0	0	0	0	1	1	6.24	4.15	0	0
49	1	99.06666666666666	168	35.1002	36.22	76	110	54	24	99	9.5	229	8.4	16.1	0.521739	4.3	122	4.6	10	235	2.2	0	0	1	0	0	0	1	1	0	1	4	50	16	6	0	0	0	1	0	0	27.08	5.04	0	0
60	2	100.8	168	35.7143	37.39	93	119	74	21	98	6	79	10.4	18.5	0.562162	2.4	134	4.1	7.9	157	0.8	0	0	0	0	0	0	1	0	0	1	5	29	27	8	0	1	0	0	0	0	7.24	1.19	0	0
48	1	90	168	31.8878	36.78	112	131	67	26	92	10.8	320	11.4	14.6	0.780822	2.8	139	4.2	7.8	171	0.7	0	1	1	0	0	0	0	0	0	1	1	42	25	1	0	0	0	0	1	0	11.74	3.24	0	0
46	2	114	178	35.9803	36.94	150	72	41	31	85	14.3	86	14.7	15.1	0.97351	2.9	138	3.2	7.8	307	2.5	0	0	0	0	1	0	0	0	0	1	16	118	51	1	0	0	0	1	0	0	0.16	1.29	1	1
70	2	76.1	183	22.7239	36.56	70	175	76	18	100	9.4	287	13.2	12.3	1.07317	3.5	137	4.1	8.7	155	0.7	0	0	0	0	0	0	0	0	0	0	0	12	34	6	0	1	0	0	0	1	10.35	1.56	0	0
43	2	170.4	168	60.3741	36.61	88	131	76	21	95	11.7	258	13.4	17.4	0.770115	3.8	132	4.4	9.4	198	0.8	0	0	0	0	0	1	1	0	0	1	0	31	23	2	0	1	1	0	0	0	8.05	3.13	0	0
71	2	60.6	168	21.4711	35.83	166	113	100	21	97	20.6	373	6.6	17.6	0.375	2.3	137	5	7.7	337	1.3	0	1	0	0	1	1	1	1	0	1	5	67	33	11	0	0	0	0	1	0	5.41	3.12	1	1
67	1	64	168	22.6757	37.17	76	154	92	18	91	11	200	12.9	13.2	0.977273	2.3	145	2.7	6.2	79	0.4	0	0	0	0	0	0	0	0	0	1	1	26	15	2	0	0	0	0	1	0	5.74	1.24	0	0
60	1	58.5	168	20.727	36.56	63	99	56	13	97	10.4	209	8.7	12.6	0.690476	3.2	137	4.3	8.1	181	0.5	0	1	0	0	0	0	0	0	0	1	1	24	17	4	0	0	0	0	1	0	9.69	2.39	0	0
70	2	68.9	183	20.5739	36.89	100	92	63	22	94	15.4	266	11	15.4	0.714286	2	132	4.9	6.4	80	0.7	0	1	0	0	1	0	0	0	0	1	4	73	44	4	0	0	0	0	1	1	24.55	24.49	0	0
74	1	119.3	175	38.9551	37	120	157	108	22	93	7.6	125	13.7	13.4	1.02239	2.8	144	3.9	8.4	133	0.8	0	1	0	0	1	0	0	1	0	1	3	47	43	5	0	1	0	0	1	0	7.62	4.99	1	1
63	1	48.8	152	21.1219	36.11	121	139	96	20	100	5.9	65	12.9	16.6	0.777108	3.3	138	3.1	8.4	199	0.3	0	0	0	0	1	1	0	0	0	1	7	31	38	4	0	1	1	0	1	1	21.91	6.64	0	1
60	1	123.4	160	48.2031	36.67	76	139	78	23	92	8.6	283	13.1	14.6	0.89726	3.2	136	4.6	8.7	161	0.7	1	0	0	0	0	0	0	1	0	1	2	20	22	4	0	1	0	0	1	0	19.13	8.22	1	1
77	1	201.9	168	71.5349	36.78	90	100	51	9	92	4.7	92	10.2	16.4	0.621951	2.8	140	4.5	8.6	77	0.9	0	1	0	1	1	0	0	1	0	1	11	67	51	4	0	0	0	0	1	1	29.8	12.05	0	0
72	2	153.9	173	51.4217	37.11	105	146	114	26	94	12	100	10	11	0.909091	2.8	136	5	7	232	1.4	0	0	0	0	1	1	1	0	0	1	2	44	32	6	0	1	0	0	1	1	12.37	3.46	0	0
48	2	84.7	168	30.0099	36.33	98	149	96	12	94	6.6	154	15.1	13.5	1.11852	2.8	139	3.5	9.4	133	0.9	1	0	1	0	0	0	0	0	0	0	1	14	16	0	0	0	0	0	0	0	2.38	1.23	0	0
37	2	132	168	46.7687	36.56	88	117	77	11	95	6.4	165	14.6	13.7	1.06569	2.8	139	3.6	8.9	113	0.9	0	0	1	0	0	0	0	0	0	0	3	30	26	0	0	1	0	0	1	0	9.29	3.49	0	0
47	1	112	168	39.6825	36.44	50	133	72	18	96	12.6	127	9.1	22.7	0.400881	3.6	137	5.3	8.7	285	3	0	0	0	0	1	0	1	0	0	1	8	81	29	2	0	0	0	1	1	1	14.03	5.27	0	0
57	2	72	168	25.5102	36.17	82	102	68	16	99	6.4	129	7.4	17.9	0.413408	2.3	131	4.2	7.4	203	1	0	0	1	0	1	0	1	0	0	0	6	57	18	12	0	1	0	0	0	0	10.12	2.25	1	1
61	1	117	168	41.4541	36.94	78	119	52	20	100	4.6	182	14.2	13	1.09231	3	132	3.9	8.5	75	0.9	0	0	0	0	1	0	0	0	0	1	4	44	28	2	0	1	0	0	1	0	27.13	2.09	1	1
69	1	80	168	28.3447	36.83	85	164	55	21	97	15.7	347	12.1	12.8	0.945312	3.3	136	4.7	9.3	499	1.2	0	1	1	0	0	1	1	0	0	1	2	32	20	4	0	0	1	0	1	0	3.03	2.16	0	0
37	1	254.05	178	80.1824	37.11	155	79	58	29	94	7.7	182	3.9	17.5	0.222857	0.3	149	3.5	1.7	27	0.3	0	1	0	0	1	1	0	0	0	1	12	105	36	0	0	1	1	0	1	1	23	10.52	0	0
56	1	74.3	168	26.3251	36.72	101	142	96	22	95	15.4	363	14.5	13	1.11538	3.4	143	5	9.3	93	1	0	0	0	0	1	0	0	0	0	1	2	44	30	6	0	0	0	0	0	0	17.69	12.89	0	0
38	2	232.7	196	60.5737	3	101	NULL	NULL	18	100	18.1	302	15.2	13.8	1.10145	2.8	139	4	8.6	134	1.1	0	0	0	0	1	1	0	1	0	1	6	36	32	2	0	1	0	0	0	0	11.47	4.6	0	0
54	2	70.9	178	22.3772	38.94	103	102	63	9	96	14.1	109	11.4	15.8	0.721519	2.4	137	4.7	7.9	55	1.1	1	0	0	0	1	0	0	0	0	1	9	45	38	5	0	0	0	0	1	1	23.77	20.92	0	0
66	2	70	175	22.8571	36.78	110	165	113	21	93	8.7	304	13.8	14	0.985714	2.2	147	4.7	9.9	174	1.2	0	1	0	0	1	1	0	0	1	1	11	75	50	7	0	0	1	0	1	1	32.32	32.32	0	0
33	1	110	152	47.6108	37.78	99	123	73	16	99	9.7	147	13.3	14.5	0.917241	3.7	141	3.5	8.1	106	0.7	0	0	0	1	1	0	0	1	0	1	4	14	25	1	0	0	0	0	1	1	17.45	4.16	0	0
73	1	82.2	170	28.4429	36.5	93	181	109	17	96	14.1	212	13.1	13.3	0.984962	2.8	136	3.7	9.1	98	0.6	0	0	1	0	0	0	0	0	0	0	0	18	22	4	0	0	1	0	1	0	3.01	1.73	0	0
67	2	78.4	178	24.7444	36.5	81	153	68	29	97	11	329	14.9	11.8	1.26271	2.9	133	3.5	8.3	137	0.8	0	1	0	0	1	0	0	0	0	1	2	38	30	2	0	0	0	0	1	1	17.08	17.32	1	1
73	1	69.2	163	26.0454	36.56	60	123	40	16	100	9.4	225	9.8	18.5	0.52973	2.8	136	4.8	9	181	1.7	0	0	0	0	0	0	1	1	0	1	4	54	43	12	0	0	0	0	1	0	12.19	3.01	0	0
68	1	65.5	164	24.3531	36.89	70	131	81	29	96	6.8	284	13	14.4	0.902778	2.8	140	3.8	9	104	0.7	0	0	0	0	0	1	0	0	0	0	0	23	19	2	0	1	0	0	1	0	5.31	2.31	0	0
62	2	92.2	168	32.6672	35.61	113	120	74	18	97	11.1	244	12.2	16.1	0.757764	2.8	140	4.3	8.1	174	0.8	0	0	0	0	1	0	0	0	0	0	2	34	32	4	0	0	0	0	1	0	8.26	1.01	0	0
66	2	94.8	168	33.5884	37	71	163	95	19	93	6.8	206	14.1	15.7	0.898089	2.8	144	3	8.3	127	1.2	1	0	0	0	0	1	0	0	0	1	1	13	18	3	0	0	1	0	1	0	8.84	2.77	0	0
50	2	94.55	179	29.5091	36.61	71	73	48	24	71	14.1	140	13.8	13.1	1.05344	3.1	143	4.9	6.7	140	2.2	0	0	0	0	1	0	0	1	0	1	18	139	45	4	0	0	0	0	0	1	10.45	10.39	0	0
77	1	69.80000000000001	157	28.3176	37.11	100	130	75	9	92	16.2	196	12.3	13.3	0.924812	3	145	4.5	8	96	0.9	0	1	0	0	0	1	0	0	0	1	1	28	34	13	0	1	0	0	1	0	8.87	3.15	0	0
57	2	64	168	22.6757	36.94	65	127	61	16	97	4.5	194	9.1	12.6	0.722222	2.8	141	4	8.5	80	0.7	0	0	1	0	1	0	0	0	0	1	7	50	25	3	0	0	0	0	1	0	8.84	1.53	0	0
72	1	177.5	165	65.1974	36.33	128	150	108	10	100	7.9	103	10	15.1	0.662252	3.8	146	4.2	8.9	250	1.7	0	1	0	0	1	1	0	1	0	1	12	61	47	6	0	0	0	0	0	1	7.71	7.76	1	1
47	2	125.9	185	36.786	36.83	107	110	51	20	95	10.6	269	12.4	14.6	0.849315	3.8	138	3.6	7.5	100	1.1	0	0	0	0	1	0	0	0	0	1	7	41	40	0	0	0	0	0	1	0	16.53	6.57	0	0
65	2	74.3	168	26.3251	36.22	127	159	92	33	93	5.4	100	13.5	14.1	0.957447	3	138	4.6	9.6	121	0.9	0	0	0	0	1	1	0	0	0	1	12	47	43	3	0	0	0	0	1	1	7.97	3.02	0	0
25	2	54	168	19.1327	36.83	80	99	83	12	100	10.6	232	12.5	11.4	1.09649	2.8	136	3.8	9	103	1.1	0	0	0	0	0	0	0	0	0	0	2	17	18	0	0	0	1	0	0	0	6.04	3.17	0	0
69	1	112.5	165	41.3223	37.61	114	144	80	19	94	18.8	134	13.6	14.2	0.957746	2.5	142	3.7	7.7	260	0.7	0	0	1	0	1	0	1	0	0	1	4	37	32	3	0	0	0	0	0	0	9.36	1.49	0	0
63	1	65.45	168	23.1895	36.56	76	183	105	23	100	10.7	335	13.3	14.5	0.917241	3	139	4.3	9.1	82	2.8	0	0	0	0	0	0	1	0	0	0	7	33	36	9	0	0	0	0	0	1	8.6	1.59	0	0
63	2	109.4	168	38.7613	36.39	108	122	67	30	95	18	134	7.7	19.7	0.390863	2.1	138	3.7	6	112	4.5	0	1	0	0	1	1	1	0	1	1	7	56	34	10	0	0	0	0	1	0	19.8	2.05	1	1
47	2	109.8	180	33.8889	36.67	80	135	82	14	97	6	107	9.4	15.5	0.606452	3.1	140	4	7.4	221	0.8	0	0	0	0	1	1	1	0	0	0	1	20	15	2	0	1	0	0	0	0	20.98	1.15	0	0
24	1	80	168	28.3447	37	122	101	51	30	90	2.6	215	12.4	13.2	0.939394	2.6	144	3.8	6.7	130	0.9	0	0	0	0	1	0	0	0	0	1	9	54	40	1	0	0	0	0	1	1	15.89	8.09	0	0
43	2	54.2	168	19.2035	36.94	106	122	80	18	100	8.4	472	7.2	17	0.423529	3	138	5	8.1	314	1.5	1	0	0	0	0	0	0	0	0	0	3	42	19	4	0	1	0	0	0	0	8.73	1.85	0	0
68	2	180	168	63.7755	37.56	79	109	65	26	96	10	295	11.8	13	0.907692	3.8	144	3.5	8	85	1.2	0	1	0	0	0	1	0	0	0	1	3	39	35	5	0	0	0	0	1	0	6.99	3.17	0	0
70	2	68.6	173	22.9209	36.44	85	99	81	12	93	17.1	115	11.6	14.3	0.811189	3.6	131	5	9.3	103	1.7	0	0	0	0	1	0	0	1	0	1	10	61	30	6	0	1	0	0	1	1	29.78	14.18	0	0
69	1	95.5	163	35.9441	36.56	103	104	57	0	99	14.6	137	6.6	15.7	0.420382	2.6	135	4.1	8.1	224	1.2	0	1	0	0	1	1	1	0	0	1	3	42	42	9	0	0	0	1	0	1	40.98	35.1	0	0
80	1	104.4	168	36.9898	36.5	81	109	84	25	93	15.9	345	9.4	14	0.671429	3	125	5.9	8.8	78	1.1	0	0	0	0	1	0	1	1	0	1	3	46	30	8	0	1	0	0	1	0	14.98	3.02	0	0
71	1	93.1	168	32.9861	36.72	85	122	77	15	100	28.7	292	10.4	20.4	0.509804	2.8	131	3.5	8.1	82	0.8	0	0	0	0	1	0	0	1	0	1	7	63	29	4	0	1	0	0	1	0	10.8	4.66	0	0
60	1	149.5	168	52.9691	36.44	90	115	66	23	92	9.2	144	14.5	17.4	0.833333	3.3	137	4.7	8.6	139	1.8	1	0	0	0	0	1	1	1	0	0	5	51	27	5	0	1	0	0	1	0	16.72	4.54	0	0
74	1	84	168	29.7619	36.72	80	135	60	19	95	7.9	200	9.5	14.3	0.664336	2.8	135	3.8	8.8	104	0.5	0	0	0	0	0	1	0	0	0	1	1	14	19	3	0	0	0	0	0	0	2.64	1.74	0	0
73	1	111.93333333333334	155	46.5904	36.56	103	153	61	26	93	10.5	146	10.6	14.7	0.721088	3.1	134	5.1	8.9	273	8	0	0	0	0	1	0	1	1	0	1	6	50	23	8	0	1	0	0	1	0	8.72	2.43	0	0
24	1	71.13333333333333	168	25.2031	37.83	132	121	83	21	95	11.6	45	9.3	12.6	0.738095	2.6	130	3.5	7.4	101	0.3	1	0	1	0	0	1	0	0	0	0	7	60	35	1	0	0	0	0	1	1	11.4	6.38	0	0
42	2	84.65	183	25.277	36.22	126	123	73	27	99	8.4	362	9.3	14.9	0.624161	2.8	140	4.9	9.2	107	1	0	0	0	0	0	0	0	1	0	1	0	28	31	2	0	1	0	0	1	0	5.02	1.86	0	0
73	1	36.5	168	12.9323	37.28	102	138	85	19	90	14	416	8	14.2	0.56338	2.8	136	3.7	8.7	94	0.2	0	0	0	0	1	1	0	0	0	0	2	45	28	4	0	1	0	0	1	0	5.62	1.9	0	1
39	2	151.2	168	53.5714	37.17	121	112	54	14	100	11.4	94	10.1	14.8	0.682432	2.8	135	5.4	8.5	136	0.7	0	0	1	0	0	0	0	0	0	1	5	22	20	2	0	1	1	0	1	0	8.2	2.19	0	0
56	2	106.8	185	31.2053	37.72	140	132	83	25	94	12.1	303	10.5	13.5	0.777778	2.8	137	4	8.3	140	1	0	0	0	1	0	0	0	0	1	1	1	36	32	4	0	0	0	0	1	0	8.69	2.36	0	0
64	2	119.96666666666665	168	42.5052	38.67	141	130	87	34	96	12.4	256	11.4	14.5	0.786207	2.8	136	4.8	8.8	161	1.1	0	0	0	0	0	0	0	1	0	1	1	42	34	3	0	0	1	0	1	0	9.48	2.83	0	0
61	1	99.35	150	44.1556	36.56	100	106	42	42	89	39.6	480	8.1	19.3	0.419689	2.9	138	5.2	8.7	205	0.9	0	0	0	0	1	0	0	0	0	1	7	74	39	2	0	1	0	1	0	1	4.31	4.38	1	1
58	2	102.5	188	29.0007	37	58	105	74	31	100	10.1	149	14.4	14.9	0.966443	2.8	139	4	8.6	117	1.2	1	0	1	0	1	0	1	1	1	1	3	25	25	8	0	0	0	0	1	0	5.15	4.82	0	0
28	2	79.1	175	25.8286	37.67	120	142	88	35	95	21.3	419	10.3	16	0.64375	2.4	140	4.4	7.9	141	0.6	0	0	0	0	1	0	0	0	0	1	2	55	42	0	0	1	0	0	1	1	26.75	26.76	0	0
52	1	74.2	160	28.9844	36.56	108	75	50	14	100	5.1	51	6	17.3	0.346821	3	122	3.3	7.9	82	1.2	0	1	0	0	0	0	0	1	0	1	4	48	25	5	0	0	0	0	1	0	8.47	3.44	0	1
66	2	81.4	168	28.8407	36.94	92	150	93	22	96	18.5	304	12.2	13.2	0.924242	3	135	3.9	7.9	143	0.9	0	0	0	0	0	0	0	0	0	0	0	13	19	2	0	0	1	0	0	0	5.51	1.36	0	0
47	2	90.7	168	32.1358	37.28	51	128	60	17	100	19.9	179	10.5	14.1	0.744681	2.8	143	3.9	9.2	152	0.8	0	0	1	0	1	0	0	0	0	0	2	37	18	1	0	0	0	0	0	0	4.53	3.68	0	0
54	2	120.7	168	42.765	36.56	94	99	58	20	91	9.3	220	9.6	14.4	0.666667	1.6	139	5.4	9.7	143	0.8	0	1	0	0	0	0	0	0	0	1	4	33	21	1	0	1	0	0	0	0	27.75	1.62	0	0
62	1	76.9	168	27.2463	36.61	121	108	44	21	95	16	249	7.9	13.9	0.568345	3.1	134	3.7	8.3	166	1.4	0	0	0	0	1	1	1	0	0	0	5	50	28	10	0	0	0	0	0	0	3.01	1.02	0	0
55	1	143.5	168	50.8433	36.33	99	134	92	30	100	10	226	11.2	14.4	0.777778	2.8	138	4.9	8.7	116	0.9	0	0	0	0	0	1	0	0	0	0	0	25	31	1	0	0	0	0	1	0	3.82	1.02	0	0
78	1	85.1	163	32.0298	36.83	92	130	55	16	95	15	134	10.8	17.2	0.627907	2.4	139	4.1	8.3	84	1.4	0	1	1	0	0	0	1	1	0	1	5	48	34	10	0	0	0	0	1	0	5.67	2.91	0	0
22	2	69.73333333333333	168	24.7071	38.06	120	94	68	18	100	10.4	396	11.8	14.6	0.808219	3.6	140	4	8.6	128	0.4	0	0	0	0	1	0	0	0	0	1	5	82	40	0	0	1	1	0	1	0	17.83	6.02	0	0
62	1	84.3	168	29.8682	36.5	86	129	75	10	100	6.8	126	9.3	14.1	0.659574	2.8	142	4.4	8.9	176	0.8	0	0	0	0	0	1	0	0	0	1	6	40	44	3	0	0	0	0	1	1	14.98	1.28	0	0
68	1	80.4	168	28.4864	35.56	58	153	102	15	97	26.3	481	9.6	13.2	0.727273	4	139	4.4	9.7	156	0.9	0	0	1	0	0	0	0	0	0	1	3	25	36	4	0	0	0	0	1	1	8.9	1.02	0	0
74	2	86.65	178	27.3482	36.72	73	149	87	13	95	4.9	131	11.4	12.7	0.897638	3.9	142	3.7	7.3	97	1.4	0	1	0	0	1	1	1	0	0	1	8	33	39	6	0	0	0	0	1	1	5.21	2.04	0	0
37	1	50	152	21.6413	36.61	85	137	88	11	100	6.9	155	7.7	16.1	0.478261	3.5	138	4.1	7.1	70	9.2	1	0	0	0	1	0	0	1	1	1	5	30	27	6	0	0	0	1	1	1	10.9	8.98	0	0
47	1	91.5	155	38.0853	36.89	0	156	100	36	100	15.9	334	13.6	12.5	1.088	4.3	136	4.7	8.4	144	0.9	1	0	0	0	1	0	0	0	0	1	5	51	53	1	0	1	0	0	1	1	27.68	5.86	0	0
56	1	93.2	173	31.1404	38.11	91	113	59	27	94	6.5	249	11.4	14.8	0.77027	3.2	141	3.8	8	87	0.7	0	0	0	0	1	0	0	0	0	1	8	27	37	1	0	0	0	0	1	1	18.7	13.64	0	0
67	1	63.5	165	23.3242	36.72	110	134	87	23	95	15.4	487	8.5	14.7	0.578231	3.3	134	3.8	8.1	120	0.3	0	0	0	0	0	1	0	0	0	0	1	52	26	2	0	0	0	0	0	0	6.8	4.03	0	0
68	2	80.2	168	28.4155	36.89	154	114	75	20	97	10.3	216	9.3	15.7	0.592357	2.8	137	3.4	7.7	196	0.6	1	1	0	0	0	0	0	0	0	0	2	43	28	2	0	1	0	0	1	0	9.34	2.66	0	0
50	1	28.2	165	10.3581	35.33	104	147	109	29	96	9	358	12.7	12.9	0.984496	2.8	138	4.1	8.6	106	0.8	0	0	1	0	0	0	0	0	0	0	0	22	25	1	0	1	0	0	1	0	2.1	1.07	0	0
74	1	126.4	168	44.7846	36.89	93	124	49	30	95	17	279	12.4	14.8	0.837838	2.8	138	3.8	9	144	1.3	0	0	0	0	0	1	1	0	0	1	2	43	35	5	0	0	1	0	1	0	3.57	1.51	0	0
72	2	107	175	34.9388	36.72	86	122	68	25	100	10.7	113	8.7	12.9	0.674419	2.8	141	4	7.7	131	1	0	1	1	0	1	0	1	0	0	1	5	23	25	5	0	0	0	0	1	1	6.01	2.4	0	0
72	2	96.7	168	34.2616	37.33	102	156	104	26	99	10.2	233	12.1	13.8	0.876812	2.8	141	4.2	9.2	116	0.7	0	1	1	0	1	1	0	1	0	1	2	40	45	11	0	0	0	0	1	1	19.66	6.79	0	0
35	1	143	173	47.7797	36.78	104	141	82	38	93	10	229	10.7	14.7	0.727891	2.8	140	4.7	9.7	242	0.6	0	0	0	0	0	1	1	0	0	1	0	36	21	2	0	1	0	0	1	1	5.97	4.58	0	0
30	2	59	127	36.5801	37.83	120	115	80	44	99	5.3	107	8.4	15.2	0.552632	2.3	143	3.4	8	102	0.9	0	0	0	0	1	0	0	0	0	1	7	75	32	1	0	0	0	0	1	1	12.38	12.28	1	1
65	1	71	160	27.7344	36.89	91	130	78	26	85	15.1	222	17.8	15.1	1.17881	3.2	133	3.6	8.5	331	1.7	0	0	1	0	1	0	1	1	1	1	14	82	33	7	0	0	0	0	1	0	17.38	9.25	0	0
64	2	103.25	170	35.7266	36.5	86	101	57	8	100	22.8	241	11.1	13.4	0.828358	2.8	137	4.6	7.7	121	1	0	0	0	0	1	0	0	1	0	1	1	25	25	4	0	0	1	0	1	1	6.05	2.36	0	0
66	1	126.4	157	51.28	35.56	80	98	41	8	98	36.1	472	8.3	16.4	0.506098	2.8	139	4	8	95	1.2	0	0	0	0	1	1	1	1	0	1	5	66	47	4	0	1	0	0	1	1	19.96	9	0	0
29	1	107	168	37.911	36.89	108	119	73	31	96	20.6	47	10.7	14.5	0.737931	2.6	135	3.5	8.1	91	1	0	0	0	0	1	0	0	0	0	0	4	35	28	0	0	1	0	0	1	0	7.85	2.93	0	0
78	2	66.5	160	25.9766	36.39	92	102	88	23	79	10.3	101	13.7	18	0.761111	3	140	3.9	9.1	119	0.9	0	0	1	0	1	1	1	0	1	1	9	34	36	8	0	0	0	0	0	1	19.92	7.01	0	0
42	2	63	168	22.3214	37.22	86	132	79	19	99	8.9	92	6.2	17.4	0.356322	4	145	4.3	11.9	156	6.9	1	0	1	1	1	0	0	1	1	1	10	45	24	4	0	1	0	1	1	1	13.91	8.99	0	0
46	1	101.5	168	35.9623	NULL	114	NULL	NULL	23	95	21.6	325	13.2	12.4	1.06452	2.7	137	3.9	6.8	526	1.8	0	0	0	0	1	0	0	0	0	1	14	106	48	1	0	0	0	0	0	1	3.16	3.16	1	1
75	1	70.8	165	26.0055	37.11	124	105	65	27	96	8.8	300	12.9	15.5	0.832258	2.8	148	4.2	8.6	231	0.6	0	1	0	0	1	0	1	1	0	1	3	51	33	6	0	0	0	0	1	0	4.09	2.24	0	0
60	2	74.94999999999999	168	26.5554	36.94	84	139	76	17	100	6.7	59	7.7	14.4	0.534722	1.8	135	4.1	7.2	116	10.5	0	1	0	0	1	0	1	0	0	1	8	58	19	8	0	0	0	0	0	0	66.39	3.5	0	1
50	1	59.3	168	21.0105	NULL	85	89	62	28	95	9.1	78	10.6	17.9	0.592179	3.2	136	3.8	8.4	80	0.6	0	0	0	1	0	0	0	1	0	0	6	24	26	4	0	1	0	0	1	0	14.08	2.29	0	0
57	1	56.43333333333334	168	19.9948	37.83	102	89	55	18	98	25.7	250	8.7	17.6	0.494318	2.8	133	3.5	8.1	110	0.5	0	0	0	0	0	0	0	0	0	1	1	37	19	7	0	0	0	0	0	0	4.67	2.89	0	0
76	1	53	160	20.7031	36.89	121	155	109	21	95	23.5	141	16.9	16.1	1.04969	2.1	134	3.9	7.1	205	1.8	0	0	1	0	1	0	0	0	0	1	16	126	56	8	0	0	0	0	1	1	21.93	3.23	0	0
70	2	112.5	178	35.5069	37.78	123	114	80	43	98	21.9	236	12.5	14.6	0.856164	2.8	145	6.3	9	380	1.8	0	1	0	0	1	0	1	1	0	1	6	82	44	6	0	0	0	0	1	0	8.19	3.08	1	1
59	1	61.5	155	25.5983	36.72	107	131	109	22	98	8.6	202	12	17.5	0.685714	2.9	143	3.5	8.8	93	0.8	0	0	0	0	0	1	0	0	0	1	0	24	31	1	0	0	0	0	1	0	5.92	3.07	0	0
41	2	105	168	37.2024	36.5	94	92	60	11	100	20.2	191	8.9	14.2	0.626761	2.4	138	4.7	7	144	2.2	0	0	1	0	1	0	0	0	0	1	4	48	29	4	0	0	0	0	0	0	4.55	2.17	0	0
72	2	77.5	168	27.4589	38.28	99	84	53	24	98	0.4	49	10.4	13.2	0.787879	2.5	129	3.1	6.7	109	1.3	0	1	0	0	1	1	0	1	0	1	9	63	26	7	0	1	0	0	0	0	85.48	2.41	0	1
27	2	146	185	42.6589	36.89	105	118	71	12	96	12.1	279	8.7	12.9	0.674419	3.6	140	4.5	8.5	121	0.7	0	0	0	0	0	0	0	0	0	1	1	35	25	1	0	0	0	0	0	0	6.16	2.3	0	0
54	1	108.8	173	36.3527	35.44	116	115	77	18	97	10.5	296	11.7	16.7	0.700599	3.2	140	3.6	8.7	142	1	0	0	0	0	0	0	1	1	0	1	2	39	26	6	0	0	0	0	1	0	7.63	3.85	0	0
47	1	86.2	168	30.5414	36.89	120	109	77	19	97	13.4	426	9.7	13.9	0.697842	3.4	136	3.9	7.8	119	0.4	0	1	1	0	0	0	0	1	0	1	0	35	19	3	0	0	0	0	1	0	10.7	2.62	0	0
66	1	58.4	165	21.4509	37	110	117	73	17	96	15.8	445	9.3	13.8	0.673913	1.9	136	4.8	7.2	116	2	0	0	0	0	1	0	0	0	0	0	5	45	25	2	0	0	0	0	1	0	6.05	2.15	0	0
70	1	80	168	28.3447	36.89	81	117	73	14	97	10.4	266	11.9	14.3	0.832168	2.8	146	4.2	9	141	0.6	0	0	0	0	0	1	0	0	0	0	1	23	18	3	0	1	0	0	1	0	8.61	7.83	0	0
49	2	55	168	19.487	37.28	99	117	65	23	99	14.3	236	11.7	14.6	0.80137	2.4	136	3.8	8.1	165	1	0	0	1	0	1	1	0	0	0	1	5	59	42	0	0	1	1	0	0	1	9.66	2.51	0	0
57	2	105.3	188	29.7929	38.72	96	167	92	29	93	10.9	148	12	13.8	0.869565	2.8	147	3.2	7.6	208	1	0	0	0	0	1	1	1	0	0	1	11	58	49	4	0	1	0	0	1	1	11.99	6.27	1	1
49	1	42.55	150	18.9111	37.06	119	85	68	21	98	10.5	346	10.3	21.6	0.476852	2.9	145	4	7.2	81	1	0	0	0	0	0	0	0	0	0	0	5	36	26	3	0	0	0	0	1	0	9.04	1.34	0	0
48	1	102.5	173	34.2477	37.06	76	145	68	20	100	11.1	223	10.5	12.7	0.826772	3.4	140	4	7.9	412	1	0	0	1	0	1	0	0	1	1	1	4	45	29	4	0	1	1	0	1	0	15.32	3.32	0	0
35	2	106.5	178	33.6132	36.89	115	110	43	17	92	19.1	21	7.9	16.2	0.487654	1.7	135	3.8	7.1	111	4.4	0	0	0	0	1	0	0	0	0	1	18	106	46	0	0	0	0	0	1	1	31.26	7.13	0	0
76	2	78.05	168	27.6538	36.33	115	110	75	31	100	8.5	147	7.6	17.2	0.44186	2.9	135	5.6	9.1	132	4.6	0	1	0	0	0	0	1	1	0	1	5	47	29	9	0	1	0	1	1	0	12.49	6.09	0	0
57	1	55.8	168	19.7704	36.39	75	88	51	19	97	12	100	10	11	0.909091	2.8	130	3.5	7.8	118	3.6	0	0	0	0	0	0	0	0	0	0	4	48	27	2	0	0	0	0	0	0	2.45	2.56	1	1
66	1	76.1	168	26.9629	36.94	101	135	79	25	96	9.8	256	8.6	18.7	0.459893	4.1	136	5.2	7.8	136	0.9	0	0	0	0	1	0	0	0	0	1	5	31	25	2	0	1	0	0	1	0	5.96	1.99	0	0
67	1	123	168	43.5799	36.5	118	101	70	19	100	14.9	377	9.5	19.8	0.479798	2.8	133	3.8	8	245	3.5	0	0	1	0	1	0	1	0	0	1	8	46	26	5	0	1	1	0	0	0	5.95	1.81	0	0
65	1	74.2	152	32.1157	36.94	83	122	68	20	100	5.5	190	10.2	13.8	0.73913	3	143	3.9	8.8	99	0.6	0	0	0	0	1	0	1	1	0	1	3	59	35	6	0	1	0	0	1	1	99.31	59.72	0	0
49	2	165	183	49.2699	37.39	128	104	53	18	88	22.9	270	14.9	15.1	0.986755	3.7	141	4.5	8.2	70	2	0	0	0	0	1	0	1	0	0	1	11	73	43	4	0	0	0	0	1	1	13.67	6.88	0	0
78	2	67.4	168	23.8804	36.56	100	87	50	12	97	3.8	51	9.9	25.2	0.392857	1.8	143	4.1	7.6	122	1.1	0	1	1	0	1	0	0	0	0	1	8	44	32	9	0	0	1	0	0	0	16.88	6.98	1	1
79	1	55	168	19.487	36.33	84	106	58	19	100	7.4	176	11.5	13.4	0.858209	2.8	138	4.4	8.1	108	0.9	0	0	1	0	0	0	0	0	0	0	4	48	40	4	0	0	0	0	1	0	6.47	2.33	0	0
55	1	55.46666666666667	168	19.6523	35	90	82	38	16	96	14.3	143	8.8	17.8	0.494382	3	126	3.1	6.7	116	0.5	0	0	0	0	1	0	0	0	0	1	7	63	35	1	0	0	0	0	1	1	19.15	18.15	1	1
68	1	107.5	160	41.9922	36.5	88	161	91	26	100	10.5	153	12.3	12.6	0.97619	3.2	134	3.9	8.5	376	1.5	0	0	0	0	1	0	1	0	1	1	7	59	28	5	0	0	0	0	0	1	5.5	5.41	1	1
76	1	42.5	150	18.8889	36.33	76	124	67	21	98	20.8	455	10	15	0.666667	2.8	136	3.3	6.4	148	0.3	0	0	0	0	1	0	1	0	0	0	6	31	27	5	0	0	0	0	0	0	5.37	1.62	0	0
59	2	77	191	21.1069	37	76	102	73	15	100	17.2	282	12.2	16.8	0.72619	2.3	143	4.7	8	122	2	1	0	0	1	1	0	0	1	1	1	11	46	40	6	0	0	0	0	1	1	14.98	1.91	1	1
77	2	113	168	40.0368	36.06	111	147	73	35	94	16.9	180	17.3	13.2	1.31061	3.8	139	3.8	8.9	186	1.8	0	0	0	0	0	1	0	0	0	1	4	42	34	3	0	0	0	0	1	0	5.64	1.32	0	0
57	2	105.2	168	37.2732	36.94	105	152	65	22	96	8.5	301	9	16.8	0.535714	2.8	138	4.2	7.4	209	1.1	0	0	1	0	0	1	1	0	0	1	1	40	33	6	0	1	1	0	1	1	17.47	9.22	1	1
79	1	92.9	168	32.9152	38.17	131	127	78	18	96	0.7	158	6.1	21.6	0.282407	3	134	5	8	99	6.2	0	0	0	0	1	0	0	0	0	1	10	70	28	5	0	1	0	0	1	0	14.96	1.93	0	0
72	2	97.45	183	29.0991	36.33	78	103	61	16	100	12.3	144	10.3	14.2	0.725352	2.8	135	4.7	7.8	110	0.8	0	1	0	0	0	1	0	0	0	1	5	25	28	4	0	1	1	0	1	1	4.77	1.21	0	0
76	2	86.2	168	30.5414	36.89	97	102	52	19	92	3.8	85	7.2	17.3	0.416185	2.8	138	3.7	7.4	113	0.9	0	0	1	0	0	0	0	0	0	1	3	32	19	5	0	0	0	0	1	0	6.7	1.68	0	0
67	1	48.8	160	19.0625	36.5	114	89	62	29	84	44.6	835	8.3	13.1	0.633588	2.3	135	3.7	8	125	0.8	0	0	0	0	1	0	0	1	0	1	7	56	43	5	0	1	0	0	1	1	20.51	14.97	1	1
50	1	91	168	32.2421	36.28	70	140	68	29	100	22.1	299	10.2	13.2	0.772727	3.5	137	3.6	7.9	150	0.7	0	0	0	0	1	0	0	0	0	1	2	45	29	2	0	1	0	0	1	0	33.33	21.48	0	0
59	1	137.2	157	55.6615	36.72	88	NULL	NULL	21	93	10	263	11.8	14.6	0.808219	3.3	141	3.2	8.5	273	0.6	1	0	0	0	0	1	1	0	0	1	0	26	19	5	0	0	1	0	1	0	6.88	1.45	0	0
24	2	55	168	19.487	37.22	135	161	96	21	96	15.6	279	10	12.4	0.806452	2.1	131	4	7.9	111	0.4	1	0	0	0	0	0	0	0	0	1	1	52	42	0	0	0	0	0	1	1	57.77	8.22	0	0
65	1	98.3	168	34.8285	37.17	81	79	66	14	85	11.3	255	11.3	14.6	0.773973	3.1	134	5.2	8.1	395	1.1	0	0	0	0	1	1	0	0	0	1	12	118	58	3	0	0	1	0	0	1	5.12	5.15	1	1
71	1	64.7	168	22.9238	37.28	93	129	61	35	94	9	143	7.5	17.3	0.433526	2.7	139	3.2	8.1	118	0.4	0	0	1	0	1	1	1	0	0	1	4	38	26	10	0	1	0	0	1	0	12.68	4.06	0	0
32	2	84.56666666666666	178	26.6907	37.06	75	104	82	18	97	10.5	370	10.4	18.6	0.55914	2.8	134	3.4	8	122	0.7	0	0	1	0	1	0	1	0	0	1	4	40	33	5	0	0	0	0	1	1	2.53	2.45	0	0
62	1	85.6	168	30.3288	37.39	112	138	87	26	96	11.8	301	12	13.2	0.909091	2.9	133	4.5	8.6	122	0.6	0	1	0	0	0	0	0	0	0	1	1	38	30	2	0	1	0	0	1	0	11.61	1.22	0	0
56	2	95.73333333333333	168	33.9191	36.83	86	126	54	18	96	8.9	148	7.5	14.6	0.513699	2.8	138	3.3	7.9	113	1	0	0	0	0	0	1	1	1	0	1	2	13	18	4	0	0	0	0	1	0	14.73	1.74	0	0
79	2	92.35	180	28.5031	37.33	94	102	57	21	97	14.1	504	8.2	14.6	0.561644	2.6	138	4.3	8.7	101	0.7	0	1	0	0	1	1	1	0	0	0	4	60	29	5	0	1	0	0	0	1	10.12	1.14	0	0
70	2	139.3	180	42.9938	37	71	110	77	19	95	4	210	13.6	14.3	0.951049	2.7	137	4.7	8.7	244	1	0	1	0	0	1	0	1	0	1	1	3	38	30	6	0	1	1	0	1	1	9.08	7.2	0	0
70	1	111.6	168	39.5408	36.5	60	149	66	14	95	4.1	225	10.3	13.1	0.78626	2.8	141	4	9.5	176	0.8	1	0	0	1	0	0	1	1	0	1	1	23	14	5	0	0	0	0	1	0	1.38	1.1	0	0
78	2	87.3	168	30.9311	37.22	101	120	75	16	100	8	73	10	12.7	0.787402	3.3	140	4	8.6	151	1	0	0	0	0	0	1	0	0	0	1	2	27	37	4	0	0	1	0	1	0	3.95	1.07	0	0
71	2	94.5	178	29.8258	36.33	77	138	73	22	100	12.1	139	13.2	16.1	0.819876	3.9	140	3.9	8.2	188	1.5	0	0	0	0	1	0	1	1	0	1	5	31	27	12	0	1	0	0	1	1	148.58	19.93	0	0
57	2	70.6	188	19.9751	36.67	94	112	75	15	97	28.9	111	9.4	12	0.783333	3	146	3.8	9.5	281	0.8	0	1	0	0	1	1	1	0	1	1	7	61	42	8	0	1	1	0	0	1	13.03	4.55	1	1
78	1	64.1	157	26.0051	37	120	123	72	39	99	17.2	318	13.1	13.7	0.956204	3.5	142	3.1	9	116	0.7	0	0	0	0	1	0	0	1	1	1	4	48	44	6	0	0	0	0	0	1	26.52	11.37	0	0
49	1	112.3	164	41.7534	37	107	130	89	21	97	7	163	9.6	14.1	0.680851	2.8	141	3.9	8.8	90	0.9	1	0	1	0	0	1	0	0	0	1	0	22	22	0	0	0	0	0	0	1	21.44	4.95	0	0
29	1	76.45	168	27.0869	36.89	124	120	79	42	100	32.8	302	10.2	14.7	0.693878	2.6	133	4.4	8.2	126	0.6	0	0	0	0	1	0	0	0	0	1	2	45	30	0	0	1	0	0	0	0	26.47	2.16	0	0
27	1	66.7	163	25.1044	39.39	151	107	63	33	95	23	89	8.8	14.3	0.615385	1.6	137	3.7	6.8	147	0.7	0	0	0	0	1	1	0	0	0	1	12	67	44	0	0	1	0	0	1	0	44.76	21.88	0	0
66	2	137.2	168	48.6111	37.11	99	114	81	35	98	10.7	221	13.6	14.6	0.931507	3.2	141	3.3	8.7	104	1.5	0	1	0	0	1	0	1	1	0	1	2	50	42	8	0	1	0	0	0	1	9.69	1.76	0	0
66	2	117.5	168	41.6312	36.83	96	94	57	23	97	16.6	228	8.5	16.4	0.518293	2.8	141	4.7	8	174	7.4	0	0	0	0	0	0	1	0	0	1	5	59	23	6	0	1	1	0	1	0	10.84	1.93	0	0
62	1	72	168	25.5102	36.44	111	104	70	33	100	31.1	85	10	21.8	0.458716	1.5	133	4.4	7.4	113	0.4	0	0	0	0	1	1	0	0	0	1	8	61	36	9	0	1	1	0	1	0	23.77	2.79	1	1
62	2	96.25	180	29.7068	36.78	110	166	119	28	99	24.6	162	10.6	18.8	0.56383	1.8	141	4.7	8.5	135	3.9	0	0	0	0	1	0	1	0	0	1	6	67	29	7	0	1	0	0	1	0	18.1	1.51	0	0
68	1	97	165	35.629	36.72	65	137	68	9	98	8.5	220	10.8	13.2	0.818182	3.6	144	4.1	8.8	119	0.5	0	1	0	0	1	1	1	0	0	1	2	36	34	8	0	0	0	0	0	0	15.9	8.88	0	0
62	1	94.5	168	33.4821	36.67	105	135	104	20	99	9	187	13.2	14.6	0.90411	2.8	141	4	9.4	123	1.1	0	0	0	0	0	1	0	0	0	1	1	31	31	2	0	0	1	0	0	0	2.74	1.12	0	0
53	2	124	168	43.9342	36.56	93	120	55	16	97	9.1	293	11.4	12.9	0.883721	2.8	139	3.8	8	109	0.7	0	0	0	0	1	1	0	0	0	1	3	30	12	7	0	0	1	0	1	0	8.33	2.38	0	0
70	2	90	178	28.4055	36.61	71	147	84	12	99	9.9	161	12.3	16.5	0.745455	2.8	143	3.6	8.5	158	0.8	1	0	0	0	1	0	0	0	0	0	0	19	16	2	0	1	0	0	0	0	19.39	2.02	0	0
48	2	169.3	168	59.9844	36.67	151	134	117	24	96	12	168	11.7	14.4	0.8125	2.8	137	5.2	8.6	145	1.3	0	1	0	0	0	0	0	1	0	1	3	45	31	1	0	0	1	0	1	0	11.72	1.85	0	0
39	2	90.3	168	31.994	36.89	66	112	58	14	100	15.2	335	13	14.2	0.915493	3.1	134	5	8.3	95	0.9	1	0	1	0	1	0	0	0	0	1	7	54	31	1	0	1	0	0	1	0	11.73	5.18	0	0
43	2	90.3	173	30.1714	38	131	136	59	22	95	79.7	194	7.9	14.6	0.541096	1.6	131	4.7	8	193	1	1	0	0	0	1	0	1	1	1	1	4	49	32	5	0	0	1	0	1	1	28.88	8.91	0	1
57	1	53	168	18.7783	36.61	114	104	68	24	100	6.6	12	9.2	14.9	0.61745	1.5	133	3.5	7.4	147	0.9	1	0	1	0	1	0	0	0	0	1	8	72	39	2	0	1	0	0	1	1	26.67	4.74	1	1
49	1	60	157	24.3418	37.22	116	134	86	19	96	29.2	53	10.6	14.6	0.726027	2.7	148	3.7	7.4	218	0.5	1	0	0	0	1	0	0	1	0	1	6	51	29	1	0	1	0	0	1	1	15.09	9.5	0	0
61	2	53.6	168	18.9909	36.83	140	93	64	26	99	4.7	259	9.3	17.3	0.537572	2.8	136	4.2	7.1	146	0.4	0	1	1	0	0	0	0	0	0	0	1	47	31	4	0	1	1	0	1	0	6.27	1.56	0	0
36	2	110	180	33.9506	36.5	72	103	54	13	99	10.5	173	11.5	15.1	0.761589	3.5	138	4.4	8.7	88	0.9	1	0	0	0	1	0	0	1	0	1	5	33	27	1	0	0	0	0	1	1	21.62	7.37	0	0
55	1	103.2	175	33.698	36.61	112	108	88	25	93	9.9	152	8.7	18.1	0.480663	3.4	136	4.4	8.7	112	1.6	0	0	0	0	1	0	0	0	0	1	3	41	28	4	0	1	0	1	1	1	26.99	27.08	1	1
62	2	67.1	180	20.7099	37.22	147	202	68	10	99	5.4	50	8	18.1	0.441989	2.9	133	5	8.2	128	2.1	0	1	1	0	1	0	1	1	0	1	8	67	41	11	0	1	0	0	0	1	23.41	14.45	1	1
43	1	50	178	15.7808	NULL	133	120	72	12	100	21.7	831	7.9	18.7	0.42246	2.8	137	4.4	8.9	226	0.5	0	0	1	0	1	0	0	0	1	1	8	55	51	7	0	1	0	0	0	0	1.64	1.66	1	1
68	2	75.6	178	23.8606	37.89	118	87	59	15	94	12	164	12.3	14.1	0.87234	2.8	138	3.4	8.7	122	0.6	1	0	1	0	1	0	0	0	0	0	5	44	34	2	0	0	0	0	1	0	6.18	2.56	0	0
73	2	208.6	183	62.2891	36.56	120	120	72	41	95	25.7	167	12.4	14.9	0.832215	2.8	132	4.6	8	381	2.1	1	0	0	0	1	0	1	0	0	1	7	92	39	9	0	1	0	0	1	1	6.77	6.66	0	1
66	2	93.7	175	30.5959	37.11	78	97	64	22	93	8.1	211	13	14.1	0.921986	3.9	142	4.9	8.7	118	1	0	1	0	0	1	0	0	1	0	1	4	34	34	5	0	1	0	0	1	1	28.29	18.3	0	0
67	2	130	157	52.7405	36.94	87	100	81	17	98	7.5	242	14.2	13.8	1.02899	2.9	134	5.1	7.7	152	1	0	0	0	0	1	1	1	1	0	1	7	88	52	4	0	1	0	0	1	1	33.72	8.99	0	0
68	2	59.2	173	19.7801	37.17	110	130	96	26	96	3.3	150	11.1	13.2	0.840909	3	116	3.1	6.5	749	0.5	0	0	0	1	1	0	0	0	0	1	7	45	36	5	0	1	0	0	0	1	165	42.2	0	0
69	2	100	178	31.5617	37.5	96	186	107	25	93	21.1	229	15.3	13.6	1.125	3.9	137	3.5	8.5	160	0.7	0	0	0	0	1	0	0	0	0	1	6	52	41	4	0	0	0	0	1	1	28.88	3.78	0	0
65	1	120.3	168	42.6233	36.06	148	159	87	28	97	15.1	222	15.2	13.8	1.10145	2.8	141	4.3	8.7	132	0.7	0	0	0	0	0	1	0	0	0	0	0	31	27	3	0	0	0	0	1	0	4.85	1.86	0	0
51	2	89	168	31.5334	36.78	89	141	94	24	96	9.7	287	12.2	15.7	0.77707	2.8	139	3.9	8.8	175	1.2	1	0	1	0	0	0	0	0	0	0	1	19	24	2	0	0	0	0	0	0	3.87	2.27	0	0
62	2	98.2	188	27.7841	36.39	82	116	80	13	96	8.2	403	11	13.8	0.797101	2.8	140	3.6	8.8	113	0.6	0	0	0	0	0	1	0	0	0	1	1	33	30	2	0	1	1	0	1	0	3.83	1.12	0	0
32	1	108.2	168	38.3362	37.94	107	163	87	16	100	10	241	8.2	13.4	0.61194	2.8	135	4.1	8.5	119	0.9	0	0	0	0	0	0	0	0	0	1	3	39	22	0	0	0	1	0	1	0	10.51	3.59	0	0
39	2	61.23333333333333	173	20.4595	36.89	100	132	55	15	99	18.4	321	12.8	13.1	0.977099	2.8	142	4.2	9	54	0.8	0	0	0	0	0	0	0	0	0	0	2	38	25	0	0	0	0	0	1	0	15.1	1.08	0	0
73	1	84.15	163	31.6722	36.56	72	128	56	13	100	8.1	192	11	13.2	0.833333	2.8	143	3.9	8.5	105	0.6	0	0	0	0	0	1	0	0	0	0	1	28	21	3	0	1	1	0	0	0	11.19	2.09	0	0
36	2	101	180	31.1728	36.67	95	123	81	28	95	8	228	12.5	14.4	0.868056	2.8	145	3.6	8.4	113	0.3	1	0	0	0	0	0	0	0	0	1	1	36	28	3	0	0	0	0	1	0	3.78	2.89	0	0
60	2	90	183	26.8745	38.06	86	108	66	18	97	20.5	157	12.9	13.7	0.941606	2.9	149	3.1	8.3	174	1.8	0	0	0	0	1	1	0	0	0	1	8	41	31	3	0	1	0	0	1	1	34.82	34.8	0	1
35	1	63.4	168	22.4632	37.06	111	125	78	20	100	5.8	153	9.6	19.9	0.482412	2.8	130	3.9	8.1	120	0.4	1	0	0	0	0	0	0	0	0	0	2	41	23	1	0	0	0	0	0	0	5.75	2.67	0	0
70	1	124.7	157	50.5903	37.22	123	162	117	28	92	26.2	289	14.2	13.2	1.07576	3.4	142	3.9	9.5	200	0.8	0	0	0	0	1	1	0	0	0	1	6	57	42	3	0	1	0	0	1	1	9	8.94	1	1
74	1	58.4	168	20.6916	36.83	110	136	79	32	94	8	217	12.9	14.1	0.914894	2.8	144	3.9	8.7	145	0.6	0	0	0	0	0	0	0	0	0	0	0	29	25	4	0	0	0	0	1	0	6.75	1.93	0	0
69	2	93.7	183	27.9793	37.89	107	111	51	13	100	9.7	153	11.9	14.6	0.815068	3.1	139	5.4	8.7	287	1.3	0	0	0	0	1	1	0	0	0	0	5	41	30	4	0	0	0	0	1	1	9.3	1.79	0	0
54	2	85	183	25.3815	37	108	135	73	25	96	19.4	24	8.6	14.7	0.585034	2.2	137	4.1	8	335	3.1	0	0	0	0	1	0	0	0	0	1	14	100	54	8	0	1	0	1	1	1	13.18	12.84	1	1
67	2	140.95	168	49.9398	35	68	114	80	18	97	6.7	185	9.7	16.2	0.598765	3.8	141	4	7.3	81	4.5	0	0	0	0	0	0	1	1	0	1	6	53	24	9	0	0	1	0	1	0	8.85	4.43	0	0
35	2	74.2	183	22.1565	38.11	55	103	57	18	99	14.9	148	13.9	12.3	1.13008	4	141	4.1	8.5	105	0.9	0	0	0	0	1	0	0	0	0	1	5	18	28	0	0	0	0	0	0	1	11.05	10.96	0	0
53	1	116	163	43.6599	36.89	95	130	79	16	97	14.6	269	12.3	15.6	0.788462	3.8	140	3.9	8.7	157	0.6	0	0	0	0	1	1	1	0	0	1	1	20	27	3	0	0	1	0	1	1	11.04	7.84	0	0
77	1	64.5	188	18.2492	37	70	121	65	22	100	9.3	161	7.8	14.1	0.553191	2.8	141	3.5	7.5	115	0.6	0	0	0	0	0	0	0	0	0	0	1	27	24	5	0	0	0	0	1	0	3.67	1.9	0	0
69	2	89.2	168	31.6043	37.06	136	108	55	20	100	19.4	133	10.1	14.2	0.711268	2.6	142	3.6	6.8	112	1.3	0	1	0	0	1	0	0	0	0	1	5	75	45	6	0	1	0	0	0	1	14.51	1.61	0	0
64	1	110	168	38.9739	35.56	104	143	75	29	100	10.9	313	10.2	18.9	0.539683	2.7	138	3.4	7.8	243	0.8	1	0	0	0	0	1	0	1	0	1	7	38	37	10	0	0	0	0	1	1	8.72	1.99	0	0
76	1	70	168	24.8016	36.61	64	126	49	37	94	17.8	519	10.8	13.8	0.782609	3	138	4.5	8.5	147	1.9	0	1	1	0	1	0	1	1	0	1	2	45	23	8	0	0	0	0	1	0	15.01	9.91	0	1
33	1	100.1	164	37.2174	37.56	139	103	50	27	97	36.3	216	10.7	13.8	0.775362	3.1	133	3.5	7.9	108	0.7	0	0	0	0	0	0	0	0	0	1	3	59	31	1	0	0	1	0	1	0	13.96	2.4	0	0
63	2	66.9	168	23.7032	36.78	71	109	59	16	89	19.7	318	10.4	15.2	0.684211	2.8	131	4.1	7.7	118	1.1	1	0	1	0	1	0	0	0	0	0	5	22	22	9	0	1	0	0	1	0	7.7	3.67	0	0
72	1	62	168	21.9671	36.44	92	107	65	20	100	8.8	111	9.9	12.9	0.767442	2.8	142	3.2	6.1	214	0.5	0	1	0	0	1	0	0	0	0	1	3	36	29	4	0	1	1	0	1	0	15.02	4.92	0	0
67	1	60.3	163	22.6956	37.61	101	125	73	22	95	10.4	411	9.6	14.4	0.666667	2.8	142	3.6	9.3	99	0.7	0	0	1	0	0	0	0	1	0	0	1	21	22	7	0	1	0	0	1	0	3.85	1.05	0	0
51	2	65.4	168	23.1718	36.5	87	93	59	11	100	14.5	311	9.4	11.9	0.789916	3.5	136	4	8.8	162	0.5	1	0	0	0	0	1	0	0	0	1	3	61	32	7	0	1	0	0	1	1	10.5	4.14	0	0
79	1	71	168	25.1559	36.89	90	100	47	0	96	9.5	214	11.4	17.9	0.636872	2.8	144	4.1	8.1	93	0.6	0	0	0	0	0	1	0	0	0	0	2	33	29	4	0	0	0	0	1	0	2.75	1.92	0	0
40	2	201.3	168	71.3223	36.67	92	120	80	20	90	8.4	163	14.6	18.8	0.776596	2.8	136	4.1	9	83	0.7	0	0	0	0	0	1	0	0	0	1	1	14	15	0	0	1	1	0	1	0	5.71	1.58	0	0
24	1	164	175	53.551	36.56	91	145	72	20	99	5.9	313	10.5	15.4	0.681818	3.8	141	3.2	8.6	89	0.6	0	0	0	0	0	0	0	0	0	1	1	40	27	0	0	1	0	0	1	0	4.07	1.26	0	0
66	1	54.3	168	19.2389	36.56	94	95	51	22	98	16.5	383	13.6	14	0.971429	2.8	139	4.5	9.6	97	0.5	1	0	0	0	0	1	0	1	0	0	5	25	35	4	0	1	0	0	1	1	3.82	1.97	0	0
24	2	130.73333333333332	191	35.836	38.06	104	146	97	16	100	31.4	148	12.2	14.4	0.847222	2.6	149	3.3	6.5	150	1.1	0	0	0	0	1	0	0	0	0	1	5	68	44	1	0	1	1	0	1	1	15.37	8.58	0	0
45	2	119	185	34.7699	37.28	111	145	73	17	97	11.1	482	13.8	13.9	0.992806	2.8	135	4.9	9.7	209	1.6	1	0	0	0	0	1	0	0	0	1	6	72	36	1	0	0	0	0	1	0	16.45	1.14	0	0
53	2	130.7	178	41.2511	36.72	115	92	53	34	83	17.3	564	13.6	12.9	1.05426	3	136	5.8	8.6	191	2.3	0	0	0	0	1	1	0	0	0	1	11	74	47	1	0	0	0	1	0	1	9.97	10.97	1	1
71	2	150.6	168	53.3588	36.89	73	143	83	26	97	9.1	133	12	14.8	0.810811	2.8	135	4.8	8.1	160	1.2	0	0	0	0	0	0	0	0	0	1	2	31	26	5	0	0	0	0	1	0	8.37	4.7	0	0
43	1	61.7	168	21.8608	38.56	139	118	105	33	89	9.2	224	6.5	19.2	0.338542	2.4	128	3.9	7.3	408	0.5	1	0	0	0	1	0	0	0	0	0	4	49	31	0	0	1	0	0	1	0	15.52	2.02	0	0
79	1	66.2	165	24.3159	36.33	68	124	67	18	100	19.8	54	11.8	18.9	0.624339	2.5	140	4.9	8	106	2.1	0	1	0	0	1	1	0	1	1	1	14	82	48	7	0	0	0	0	1	1	30.53	12.63	0	1
26	2	87.7	173	29.3027	37.39	132	133	87	36	95	23.7	230	10.6	13.1	0.80916	3.2	136	3.6	7.7	97	0.8	1	0	0	0	0	1	0	0	0	0	1	37	26	0	0	0	0	0	0	0	9.1	2.73	0	0
68	1	93	168	32.9507	35.72	90	112	82	15	91	16.4	201	11.8	14.1	0.836879	2.8	144	4.9	7.4	180	0.8	1	0	0	0	1	1	1	0	0	0	2	36	35	3	0	0	0	0	1	0	5.75	2.71	0	0
78	2	96.3	180	29.7222	36.56	91	102	46	20	97	17.2	204	10.6	16.8	0.630952	2.4	137	4	8	230	1.9	0	0	0	0	1	0	1	1	0	1	11	62	43	17	0	1	0	1	0	1	16.91	16.95	1	1
74	1	68.16666666666667	165	25.0383	35.67	60	118	58	25	100	17.4	267	9.8	14.6	0.671233	3.1	141	4.4	8.5	229	3.1	0	0	0	0	1	0	0	1	0	1	7	48	33	11	0	1	1	1	1	1	10.34	10.44	1	1
73	1	86.73333333333333	168	30.7303	36.67	119	115	77	19	94	10.3	227	10.3	15.2	0.677632	2.8	138	3.9	7.8	192	0.6	0	0	0	0	0	1	0	0	0	1	3	39	27	3	0	1	0	0	1	0	18.89	3.84	0	0
65	2	102.2	168	36.2103	37.33	103	108	56	24	97	0.1	13	7.2	16.9	0.426036	2.6	136	3.9	6.8	172	1.2	0	0	0	0	1	0	0	0	0	1	6	50	20	7	0	1	0	0	1	0	173.1	1.04	0	0
52	2	100	178	31.5617	37.33	63	133	77	11	98	20.4	141	15.6	14.6	1.06849	3.3	141	4.5	8.3	134	1.4	1	0	0	0	1	1	0	0	0	1	9	32	27	7	0	0	0	0	1	1	32.95	25.22	0	0
38	2	90.05	180	27.7932	38.89	134	123	71	26	95	22.6	397	14.1	13.8	1.02174	2.5	139	4.8	7.4	126	0.8	0	0	0	0	1	0	0	0	0	1	6	48	37	0	0	1	0	0	0	1	46.88	24.66	0	0
51	2	109.2	168	38.6905	37.06	78	119	61	16	98	17.4	188	12.1	14.2	0.852113	2.9	149	2.6	6.9	144	0.9	0	0	0	0	0	0	0	0	0	1	4	25	30	1	0	1	0	0	0	1	6.74	2	0	0
53	2	129.6	185	37.8671	36.5	75	74	54	20	99	3.6	208	10.6	23.9	0.443515	3.3	120	3.1	9.2	109	2.9	0	1	0	1	0	0	0	1	0	1	5	55	29	5	0	1	0	1	1	0	7.49	7.48	1	1
46	1	106.66666666666667	168	37.7929	37.22	91	127	63	14	100	46.9	383	8.2	13.6	0.602941	1.4	133	3.7	6.9	304	2.7	0	0	0	0	1	0	1	0	0	1	9	64	37	4	0	1	0	0	0	1	61.99	2.99	0	0
44	2	132.25	185	38.6413	36.94	103	122	65	14	98	18.1	422	10.2	14.6	0.69863	3.1	133	4.8	8.7	121	1.1	1	0	0	0	1	1	0	1	0	1	8	42	35	1	0	0	0	0	1	1	18.63	1.49	0	0
53	2	82	183	24.4857	36.67	82	144	60	18	100	10	162	12.8	13.7	0.934307	4.1	141	4.1	7.6	133	0.8	0	0	0	0	1	0	0	0	0	0	2	18	32	2	0	1	0	0	1	1	33.68	22.85	0	0
64	1	85	150	37.7778	36.5	92	101	64	9	99	10.8	329	9.2	16.5	0.557576	3.7	139	4.1	9.5	125	0.7	0	0	0	0	0	1	1	0	0	1	5	36	43	5	0	0	1	0	0	1	3.69	3.69	0	0
51	2	86.4	168	30.6122	36.78	94	104	69	22	94	5.3	249	9.4	16.7	0.562874	2.8	143	4	8.1	127	1.1	0	0	0	0	1	1	1	1	0	0	5	38	24	4	0	0	0	0	1	0	1.79	1.07	0	0
56	2	89.63333333333333	180	27.6646	37	100	114	78	22	97	14.6	224	6.2	18.6	0.333333	3.1	136	4.5	8.1	109	0.8	1	0	0	0	1	0	0	0	0	1	5	57	37	2	0	0	0	0	1	1	10.29	7.4	0	0
79	1	87	168	30.8248	37.33	75	187	90	12	100	4.8	188	10.2	18	0.566667	2.9	138	4.1	8.1	364	0.9	0	0	1	0	1	0	1	1	0	1	2	44	38	8	0	0	1	0	1	1	5.97	2.82	0	0
59	1	66.2	168	23.4552	37.44	98	124	66	22	99	50.8	483	10.7	16.2	0.660494	2.1	132	3.6	8.8	106	0.6	1	0	0	0	1	0	0	0	0	0	2	44	32	1	0	1	0	0	1	0	54.91	1.05	0	0
64	2	74.6	168	26.4314	36.61	78	170	89	17	100	6.4	121	12.4	16.1	0.770186	4.4	137	4.8	11	83	8.9	0	0	0	0	1	1	1	0	0	1	7	62	27	6	0	0	0	0	1	1	9.08	3.23	0	0
79	2	115	178	36.2959	38.17	87	144	92	17	99	9.9	165	14.3	13.9	1.02878	2.8	147	3.9	8.6	108	1	0	1	0	0	1	0	0	1	0	1	4	42	27	7	0	0	0	0	1	1	49.84	50.18	0	1
61	1	99.3	168	35.1828	38.22	90	91	65	22	93	10	69	11.6	16.3	0.711656	3.3	140	5.1	8.6	156	1.7	1	0	0	0	1	1	1	0	0	1	15	116	41	3	0	0	0	0	1	1	22.69	22.04	0	0
18	2	95.6	168	33.8719	37.5	103	103	63	21	100	14.6	228	12.3	13.4	0.91791	2.9	135	4.5	8.8	121	0.8	0	0	0	0	1	0	0	1	0	1	7	56	44	1	0	1	1	0	1	1	4.98	4.95	0	0
64	2	67.5	168	23.9158	36.89	109	93	57	14	90	23	246	9.7	16.4	0.591463	2.3	140	3.5	8.2	111	0.4	0	0	1	0	1	0	0	0	0	1	4	49	26	5	0	0	1	0	1	0	27.8	4.28	0	0
24	2	128.05	191	35.1005	36.83	138	130	80	24	72	11.7	200	11.6	14.2	0.816901	2.8	145	4.3	8.9	183	1.2	0	0	0	0	1	0	0	0	0	1	5	31	36	0	0	1	0	0	1	1	13.56	12.43	0	0
67	2	100	168	35.4308	38.17	109	104	51	21	96	0.1	29	7.2	15	0.48	2.7	129	3.5	8	156	1.3	0	0	0	0	1	1	0	0	0	1	12	67	31	4	0	1	0	0	1	0	17.22	3.2	0	0
64	1	85.5	168	30.2934	36.67	88	159	100	22	96	7.3	215	12.3	13.3	0.924812	3.2	137	4.3	9	129	0.8	0	0	0	1	0	0	0	0	0	1	1	36	31	3	0	0	0	0	1	0	4.94	1.86	0	0
68	1	122.6	168	43.4382	37.11	122	114	42	34	94	27.9	100	12.5	16.2	0.771605	2.7	128	5.8	9.2	152	2	0	1	0	0	1	1	1	1	0	1	7	79	34	4	0	1	0	0	1	0	12.79	3.42	0	0
69	1	102.2	168	36.2103	35.89	102	105	72	26	94	8.5	229	12.3	13.5	0.911111	2.8	140	3.7	8.7	109	0.7	0	0	0	0	0	1	0	1	0	1	1	35	26	5	0	0	0	0	1	0	5.44	1.5	0	0
69	1	54.05	168	19.1504	37.39	109	141	104	19	85	14.7	333	8.7	14.8	0.587838	2.8	138	3.2	8.7	118	0.6	0	0	0	0	1	0	1	1	0	1	6	48	35	7	0	0	1	0	1	1	59.85	6.53	0	0
27	2	122.7	194	32.6018	36.44	89	136	88	20	100	24.1	227	10	13.2	0.757576	3	136	4.9	7.5	122	1.5	0	0	0	0	1	0	0	0	0	1	11	60	45	1	0	1	0	0	0	1	34.32	32.65	0	0
63	2	77.89999999999999	180	24.0432	36.72	82	125	76	26	100	5.8	107	12.4	15.5	0.8	3.2	142	3.4	7.1	141	0.6	1	0	0	0	1	0	0	0	0	1	4	18	31	3	0	0	0	0	1	1	6.75	1.63	0	0
50	1	51.7	168	18.3177	35.28	77	106	57	17	98	8.4	183	9.8	17	0.576471	2.5	126	5.4	7.1	168	5.1	1	0	0	0	1	0	0	0	0	1	12	73	38	6	0	0	0	1	1	1	27.9	9.9	0	0
79	1	96.3	168	34.1199	37.06	170	133	90	35	96	18.1	238	11.8	14.9	0.791946	2.5	132	3.8	7.7	278	1	0	1	0	0	1	1	0	1	0	1	14	99	55	6	0	1	0	1	0	1	1.97	2.02	1	1
62	1	63	168	22.3214	36.83	77	176	88	20	94	10.6	54	10.7	13.3	0.804511	2.9	135	3.4	8.7	141	0.5	1	0	1	0	1	0	0	0	0	1	5	33	22	8	0	0	0	0	0	0	30.8	10.85	0	1
41	2	224	180	69.1358	37.67	68	176	91	22	93	10.8	143	12	14.2	0.84507	2.9	149	4.9	9	229	1.3	0	1	0	0	1	0	0	1	1	1	6	36	27	3	0	0	0	0	0	1	25.94	25.97	0	0
60	1	104.3	168	36.9544	36.5	63	91	53	19	97	14.9	265	8.6	12.8	0.671875	2.8	140	4	7.9	131	0.8	0	0	0	0	0	1	0	0	0	0	2	24	22	2	0	0	0	0	0	0	5.85	2.13	0	0
67	1	77.9	168	27.6006	36.67	105	106	68	17	96	18.1	302	11.7	21.1	0.554502	3.3	133	3.6	8.5	117	0.4	1	1	1	1	0	0	0	1	0	1	4	32	34	4	0	0	0	0	1	0	50.68	7.7	0	0
44	2	157.75	188	44.6328	37.17	77	162	75	17	100	15.7	126	11.9	13.3	0.894737	2.8	135	4.6	8	104	0.8	0	0	1	0	0	1	0	0	0	1	5	22	28	0	0	1	0	0	1	1	6.15	3.07	0	0
51	1	80.5	173	26.897	36.39	81	144	86	18	100	8.7	328	11.3	14.1	0.801418	2.8	140	3.7	9.2	107	0.7	0	0	1	0	0	1	1	0	0	1	3	28	31	3	0	1	0	0	1	0	11.93	4.71	0	0
78	1	110.7	168	39.2219	37.83	72	146	74	21	98	8.9	221	11.6	12.9	0.899225	2.8	139	4.4	7.6	174	1	0	0	1	0	0	1	1	1	0	1	1	35	26	6	0	1	0	0	1	0	3.14	2.11	0	0
63	2	76.3	168	27.0337	37.06	130	128	71	36	93	5.9	217	8.9	13.4	0.664179	2.8	138	3.9	8.3	136	0.7	0	1	0	0	0	0	0	0	0	1	0	25	28	2	0	1	0	0	1	0	6.95	1.18	0	0
56	2	73.9	180	22.8086	36.44	68	88	63	15	95	20	311	9.6	17.6	0.545455	2.4	135	4.1	7.1	115	1.2	1	0	0	1	1	0	0	1	0	1	6	55	36	2	0	1	1	1	1	1	40.84	40.63	0	0
56	1	79	163	29.7339	38.44	94	100	50	16	100	10.4	156	10.1	17.5	0.577143	2.1	161	2.3	7.7	120	2.1	0	0	0	0	1	1	0	0	0	1	9	65	35	7	0	0	1	0	1	1	9.69	1.72	1	1
47	1	228.7	168	81.0303	36.83	140	134	100	22	100	4.9	231	13.6	16	0.85	2.8	139	4.2	9.3	116	0.6	0	0	0	0	0	1	0	1	0	1	0	30	38	2	0	1	0	0	1	1	8.86	3.84	0	0
25	1	81.6	168	28.9116	37.11	116	115	55	20	100	6.8	206	8.7	15.2	0.572368	2.8	141	4.1	7.7	93	0.7	0	0	0	0	1	0	0	0	0	1	1	36	23	0	0	1	1	0	1	0	19.58	4.11	0	0
45	1	140	173	46.7774	NULL	117	NULL	NULL	24	92	26.5	195	11.9	13.2	0.901515	3.5	141	5.7	8.3	316	1.8	0	0	0	0	1	1	0	0	0	1	12	79	39	1	0	1	0	1	0	1	4.54	3.67	1	1
68	1	62.7	168	22.2151	37.17	95	104	67	NULL	96	5.7	100	10.2	13	0.784615	2.8	142	3	8.4	95	0.7	1	0	0	0	0	0	0	0	0	0	2	23	25	2	0	1	0	0	1	0	4.25	1.61	0	0
51	1	78.7	163	29.621	36.72	110	82	66	16	95	12.4	173	8.5	15.9	0.534591	2.8	136	3.6	8.2	128	0.4	0	0	0	0	0	1	0	0	0	1	0	27	23	3	0	1	1	0	0	0	5.26	1.24	0	0
67	1	117.6	168	41.6667	39.17	116	134	68	23	97	3.2	25	9.1	14.8	0.614865	2.8	140	3.7	7.5	130	0.7	0	0	0	0	0	1	0	0	0	1	5	39	22	2	0	0	0	0	0	0	6.77	3.24	0	0
70	2	66	168	23.3844	37.06	105	134	82	18	98	9	160	12	13	0.923077	2.8	137	3.8	8.8	122	1	0	0	0	0	0	1	0	0	0	1	2	37	26	2	0	0	1	0	0	0	6.21	1.62	0	0
54	2	59	175	19.2653	38.94	116	112	76	16	99	9.1	157	10.4	14	0.742857	2.7	138	4.4	7.8	120	0.6	0	0	0	0	1	1	0	0	0	0	9	37	38	2	0	1	0	0	1	1	10.9	4.54	0	0
50	2	171	168	60.5867	38.17	142	137	89	34	95	4.9	147	12.5	17.3	0.722543	2.8	136	3.3	8.8	91	1	1	0	0	0	0	0	1	0	0	1	14	90	40	12	0	0	0	0	1	0	8.27	2.48	1	1
41	1	166.8	168	59.0986	36.83	73	137	111	18	100	9.2	238	9.6	18.4	0.521739	3.2	135	3.6	8.7	285	0.9	1	0	1	0	0	0	1	1	0	0	0	23	15	4	0	0	1	0	1	0	1.73	1.61	0	0
40	2	87.5	178	27.6165	37.33	76	124	60	13	100	15.3	144	7	13.6	0.514706	3.1	138	3.7	8.3	101	1.1	0	0	0	0	1	1	0	0	0	1	4	27	29	1	0	0	1	0	1	1	21.83	12.55	0	0
50	2	163	168	57.7523	36.83	75	127	82	20	97	7.1	143	12.6	14.3	0.881119	2.7	137	4.8	8.7	129	1	0	0	1	0	0	1	1	1	0	1	3	33	20	3	0	0	0	0	1	0	13.81	3	0	0
45	2	83.3	188	23.5684	37	86	132	100	21	100	7.9	198	13.4	12.2	1.09836	3.8	142	4.4	8.9	102	1	0	0	0	0	0	0	0	0	0	1	1	17	17	0	0	1	0	0	1	0	4.74	1.6	0	0
69	2	85.7	168	30.3642	36.78	82	97	66	38	91	19.6	352	10.7	16.4	0.652439	3	135	4.5	9.2	156	1	1	1	1	0	1	0	0	0	0	1	3	52	23	9	0	0	0	0	1	1	8.13	7.24	1	1
63	1	76.2	157	30.914	36.56	68	115	39	15	99	10.2	195	8.9	16.3	0.546012	2.9	136	4.5	8.5	88	2.3	0	0	1	0	1	0	0	0	0	1	7	91	44	4	0	0	0	0	0	1	7.81	7.82	0	0
60	2	105.36666666666667	178	33.2555	36.56	80	122	73	18	95	7.9	202	12.1	16.1	0.751553	2	135	4	8	208	1	1	1	0	0	1	0	1	1	0	1	2	50	50	5	0	1	0	0	1	1	27.09	8.09	0	0
59	2	121.2	178	38.2527	37.56	60	108	66	10	100	11.2	250	12.2	12.7	0.96063	3.4	142	4.8	8.1	156	0.8	0	0	0	0	0	0	0	0	0	1	1	32	38	1	0	0	0	0	1	1	24.81	7.49	0	0
75	2	80	175	26.1224	37.22	153	85	63	18	96	12	100	10	11	0.909091	2.9	138	4.4	7.3	174	0.9	0	1	0	0	1	0	0	1	0	1	5	50	38	7	0	1	0	0	1	0	20.7	9.61	1	1
64	1	61.9	168	21.9317	36.94	127	98	60	16	97	24.9	187	9.1	13.2	0.689394	1.6	137	4	7.6	119	0.7	0	0	0	0	1	1	0	0	1	1	2	58	32	6	0	0	0	0	1	1	22.41	4.23	0	0
38	2	77.7	175	25.3714	36.78	123	100	39	22	91	22.1	300	9.9	16	0.61875	2.6	138	4.6	8	111	0.9	1	0	0	0	1	0	0	1	0	1	1	51	30	2	0	0	0	0	1	1	12.51	6.15	0	0
72	1	61.799999999999976	157	25.072	35.78	34	115	48	15	92	8.1	143	9.4	18.5	0.508108	2.8	137	7.4	8.8	51	6.1	0	1	0	0	1	0	1	1	0	1	16	104	50	8	0	1	0	1	1	1	13.87	13.92	1	1
80	2	53.8	168	19.0618	36.83	92	130	71	19	86	11.9	204	10.8	17.7	0.610169	2.5	146	5.9	8.6	137	2.1	1	1	1	0	1	1	0	1	0	1	13	84	45	6	0	1	0	0	0	1	1.11	1.13	1	1
54	2	132.9	168	47.0876	36.89	152	137	112	16	96	6.7	121	15.1	14.9	1.01342	3.9	139	3.6	8.2	123	0.7	0	1	0	0	0	1	1	0	0	1	3	37	30	2	0	0	0	0	1	0	8.34	1.41	0	0
71	1	73.7	170	25.5017	36.56	71	146	76	14	100	22.7	79	12.9	15.7	0.821656	2.4	128	4	7.4	189	4.1	1	0	0	0	1	1	1	0	0	0	17	114	43	7	0	0	0	0	0	1	1	1.05	1	1
43	2	73	168	25.8645	36.78	125	100	78	16	97	13.6	508	11.5	13.2	0.871212	3.5	142	4.5	9.2	114	0.9	0	0	0	0	0	0	0	0	0	0	1	25	20	0	0	0	0	0	1	0	4.13	2.19	0	0
50	1	80.60000000000001	152	34.8857	37.17	92	130	79	19	100	36.7	388	7.7	15.1	0.509934	3.1	121	3.8	10.3	1267	8.6	0	0	0	0	1	0	0	0	0	1	9	78	44	5	0	0	0	1	1	1	25.48	16.75	1	1
80	2	122	168	43.2256	36.83	52	93	43	21	98	17.9	180	12.2	14.3	0.853147	2.8	138	4.2	8.4	111	0.9	0	0	0	0	0	1	0	0	0	0	1	41	15	5	0	0	0	0	0	0	2.04	1.58	0	0
38	1	95.5	170	33.045	36.44	93	123	84	22	100	15.9	127	11.9	13.7	0.868613	2.8	141	4.1	7.4	141	1.1	0	0	0	0	1	0	0	0	0	1	6	44	37	0	0	0	1	0	0	1	10.4	10.37	1	1
69	2	85.3	168	30.2225	37.67	102	121	61	18	96	50.1	208	7	17.8	0.393258	3.2	141	5	8.5	109	2.8	0	0	1	0	0	1	0	0	0	0	4	54	32	4	0	0	1	0	1	0	5.82	1.54	0	0
73	1	74	157	30.0215	36.33	70	112	63	22	100	9.7	147	6.7	15.5	0.432258	2.8	132	3.6	7.8	138	0.5	0	1	0	0	0	1	1	0	0	1	5	26	21	6	0	0	1	0	1	0	6.75	1.5	0	0
64	2	93.2	175	30.4327	37.39	93	128	79	9	98	9.4	204	14.3	14.2	1.00704	2.8	138	4.2	7.8	117	1.1	0	0	1	0	0	1	0	0	0	1	2	22	24	3	0	1	0	0	1	0	2.03	1.26	0	0
66	1	89.4	168	31.6752	36.78	93	125	54	21	99	11.2	210	8.2	14.8	0.554054	2.2	138	4.6	7.7	130	0.5	0	0	0	0	0	1	1	0	0	1	1	33	26	3	0	0	0	0	0	0	66.94	1.12	0	0
65	2	160	183	47.7769	37.39	124	146	88	21	86	12.9	251	11.2	13.2	0.848485	2.8	136	4.8	8.8	117	0.8	0	0	0	0	0	0	0	1	0	1	0	27	24	3	0	0	0	0	1	0	6.41	3.68	0	0
62	1	73.8	170	25.5363	36.28	100	100	86	24	94	8.5	322	9.9	13.7	0.722628	2.9	138	3.9	9.6	137	0.9	1	1	0	0	1	0	0	1	0	1	4	47	38	9	0	0	0	0	1	1	8.71	5.61	0	0
79	2	92.5	152	40.0364	37.11	57	113	64	14	100	7.1	118	11.9	13.5	0.881481	2.8	142	3.7	7.9	110	0.8	0	1	1	0	1	1	0	0	0	0	5	18	30	4	0	1	0	0	1	1	5.31	1.03	0	0
67	2	91.1	178	28.7527	37.17	105	137	108	21	96	6.7	240	10.5	13	0.807692	3.2	139	4.1	8.2	133	1.2	1	0	0	0	0	0	0	0	0	1	2	19	19	2	0	0	1	0	1	0	13.98	3.97	0	0
58	2	93.2	168	33.0215	37.11	110	141	89	30	94	18.1	235	12.5	12.4	1.00806	2.8	142	3.6	8.6	128	0.7	0	0	0	0	0	0	0	0	0	1	1	33	23	2	0	1	0	0	1	0	6.13	2.13	0	0
72	2	114.6	168	40.6037	36.28	90	145	87	18	99	13.3	173	11.4	14.7	0.77551	2.8	146	3.5	7.8	104	1.1	0	0	0	0	1	0	0	0	0	1	1	29	29	3	0	1	0	0	1	0	14.42	1.44	0	0
73	1	72.5	160	28.3203	37.39	86	131	65	25	97	11.9	318	10.8	15.8	0.683544	2.8	140	3.4	8.5	114	0.9	0	0	0	0	1	0	1	0	0	1	5	35	36	6	0	1	0	0	1	0	7.63	1.5	0	0
54	2	125.1	168	44.324	36.5	70	131	111	16	98	6.2	255	14.4	14.6	0.986301	2.8	136	4.6	9	132	0.8	0	1	0	0	0	1	1	0	0	1	0	25	25	3	0	0	0	0	0	0	5.44	3.5	0	0
79	2	87.1	168	30.8603	36.78	80	91	58	10	100	9.7	131	10.4	13.2	0.787879	3.3	140	5	8.2	97	0.9	1	1	1	0	1	1	1	0	0	1	2	30	32	4	0	0	0	0	1	1	11.07	3.39	0	0
70	2	52.7	168	18.6721	37.17	131	126	70	35	98	5.9	234	8.4	16.1	0.521739	2.8	135	4.6	8.8	82	0.4	0	0	0	0	0	1	0	0	0	0	2	49	34	3	0	1	0	0	0	0	13.96	2.8	0	1
32	2	116.5	183	34.7875	36.67	79	126	91	24	100	9.5	355	12.7	13.5	0.940741	2.8	145	3.7	7.9	145	1	0	0	1	0	0	0	0	1	0	1	4	29	35	1	0	1	0	0	0	1	10.62	2.94	0	0
78	1	88.7	168	31.4272	36.61	91	145	121	22	79	9.9	367	8.8	18.9	0.465608	2.7	139	4.6	9.8	82	0.8	0	1	0	1	1	0	0	1	0	1	4	47	29	7	0	1	0	0	1	0	8.43	4.03	0	0
24	1	79.4	157	32.2123	37.11	105	137	101	26	99	11	228	12.8	12.3	1.04065	2.9	136	3.3	8.6	102	0.6	0	0	0	0	1	0	0	0	0	1	5	42	44	0	0	0	1	0	1	1	40.78	27.82	0	0
49	2	70.75	168	25.0673	36.78	62	139	79	6	95	16.4	344	10.4	14.6	0.712329	1.9	143	3.9	7.2	100	0.9	0	0	0	0	1	0	0	0	0	1	2	39	30	1	0	0	0	1	0	1	23.49	23.58	1	1
32	1	60	168	21.2585	39.5	128	129	65	28	92	6.3	541	8	14.8	0.540541	2.8	142	4.1	7.8	94	0.6	1	0	0	0	0	0	0	0	0	0	1	23	26	0	0	0	0	0	1	0	21.82	1.17	0	0
74	2	97.4	168	34.5096	36.67	126	98	68	31	98	17.5	290	10.1	15.1	0.668874	2.7	138	4.6	7.9	181	1.4	0	0	0	0	1	0	0	0	0	1	4	46	28	5	0	0	0	0	0	0	12.52	1.29	0	0
75	2	110	178	34.7178	36.44	69	112	77	24	97	6.2	140	9.7	14.8	0.655405	2.8	140	4.6	8.4	124	1.3	0	0	0	0	0	0	0	0	1	1	2	28	25	4	0	0	0	0	1	0	7.85	1.66	0	0
62	2	76.6	168	27.14	35.56	72	144	71	22	91	3.2	39	9.2	23.9	0.384937	2.8	138	4.9	8.7	75	4.7	0	0	0	0	1	0	1	1	0	1	10	47	32	7	0	0	0	0	1	0	13.07	1.93	0	1
66	2	88.15	173	29.453	37	107	146	111	38	100	22.4	219	10.1	14.6	0.691781	2	140	4.3	8.7	179	1.1	0	1	0	0	1	1	0	0	0	1	5	71	43	4	0	0	0	0	1	1	46.38	9.2	0	0
75	2	180	168	63.7755	36.11	96	113	82	30	96	17.4	177	8.4	17.1	0.491228	2.4	141	4.2	8.9	89	3.1	0	1	0	0	1	0	0	1	0	1	7	103	36	7	0	0	0	0	1	0	23.81	13.51	1	1
62	2	104	168	36.8481	37.56	76	125	72	23	93	6.3	151	13.4	13.7	0.978102	2.4	139	3.9	8.4	144	0.8	0	0	0	0	0	1	0	0	0	1	3	21	32	5	0	0	0	0	1	1	11.3	5.69	0	0
57	1	52.1	168	18.4595	37.06	84	75	47	15	97	10.7	406	7.5	13.3	0.56391	2.8	131	4.8	7.5	117	0.5	1	0	1	0	1	0	0	0	0	0	4	29	24	4	0	1	0	0	0	0	3.44	1.25	0	0
80	1	85.3	178	26.9221	36.72	75	149	62	15	91	7.8	130	10.8	13.2	0.818182	2.8	137	3.9	9.1	181	0.8	0	1	0	0	0	0	0	0	0	1	3	35	28	3	0	0	0	0	1	0	6.85	4.88	0	0
72	1	61.5	160	24.0234	36.61	117	115	58	40	94	21.8	265	15.8	13	1.21538	3	142	3.6	10.5	175	1	0	1	0	0	1	0	0	0	0	1	2	57	47	4	0	1	1	0	1	1	29.94	28.25	0	0
57	1	69.8	168	24.7307	36.94	96	95	59	23	100	11.9	494	8.9	16.1	0.552795	2.8	141	5.1	8.3	197	1.1	0	0	0	0	1	0	0	1	1	1	8	44	37	6	0	0	0	0	1	1	14.4	7.72	0	0
63	1	123.8	163	46.5957	37.28	54	103	80	16	97	12.9	212	9.7	20.4	0.47549	2.8	144	4	9.6	162	1	0	0	0	0	1	0	0	1	0	1	1	26	29	4	0	1	1	0	0	1	6.11	6.12	1	1
80	2	80.55000000000001	168	28.5395	35.61	70	148	57	11	100	4.9	167	9.8	13.9	0.705036	2.8	140	3.9	8.6	195	1.1	0	1	0	0	0	0	1	1	0	0	1	38	24	9	0	1	0	0	1	0	9.13	1.04	0	0
61	1	77.2	157	31.3197	36.78	109	140	59	22	86	12.2	383	10	18.5	0.540541	2.7	147	5.1	7.7	130	1	0	0	0	0	1	0	0	1	0	1	4	44	35	6	0	1	1	0	1	0	16.87	2.97	0	1
41	2	72.4	175	23.6408	36.89	92	113	68	17	96	9.9	178	15.4	14	1.1	2.8	135	4.5	7.9	96	0.8	1	0	0	0	0	0	0	0	0	1	3	18	31	3	0	1	0	0	0	0	6.74	6.65	0	0
72	1	65.4	168	23.1718	36.44	87	131	71	20	94	7.1	236	11.6	14	0.828571	2.7	145	4.4	7.7	116	0.6	0	0	1	0	1	0	0	0	0	1	3	42	28	4	0	1	0	0	1	0	2.85	1.05	0	0
51	2	126.83333333333333	180	39.1461	35.83	56	167	97	17	100	12.5	309	12.9	13.3	0.969925	2.8	136	3.8	8.4	111	0.6	1	0	0	0	1	0	0	0	0	1	3	23	34	1	0	0	1	0	1	1	7.63	3.37	0	0
53	1	60.55	168	21.4534	37.17	121	78	50	15	100	5.9	246	8.7	16.8	0.517857	2.9	139	3.8	7.6	164	0.4	0	0	0	0	1	0	0	0	0	0	2	52	34	3	0	1	0	0	1	1	18.41	9.07	0	0
59	2	108	168	38.2653	37.22	139	109	67	20	92	7.2	158	8.8	17.8	0.494382	2.8	137	4.1	8	142	0.9	0	1	0	0	0	0	0	0	0	1	1	44	25	3	0	1	0	0	1	0	7.97	2.16	0	0
63	1	110	152	47.6108	37.44	75	147	124	20	100	16.1	234	15.1	17	0.888235	3.7	135	5.7	10	221	2.6	0	0	0	0	1	1	1	0	0	1	11	110	47	5	0	0	1	0	0	1	22	5.95	0	0
